# Supplementary material
Source: PubMed Central journal article supplement (PMC4681596)
Supplement: NIHMS732925-supplement-1.pdf [file NIHMS732925-supplement-1.pdf]

**Supplementary Table S1. *PIK3CA* mutations in breast cancer from the COSMIC database.**

| Sample Name | Sampple ID | Tumor ID | Mutation CDS          | Mutation AA   | Mutation Description       | GRCh37 Genome Position |
|-------------|------------|----------|-----------------------|---------------|----------------------------|------------------------|
| 42          | 1860499    | 1751440  | c.1624G>A             | p.E542K       | Substitution - Missense    | 3:178936082-178936082  |
| 52          | 1860501    | 1751442  | c.1633G>A             | p.E545K       | Substitution - Missense    | 3:178936091-178936091  |
| 99          | 1860497    | 1751438  | c.1624G>A             | p.E542K       | Substitution - Missense    | 3:178936082-178936082  |
| BC6         | 1280972    | 1192263  | c.?                   | p.H1047R      | Substitution - Missense    |                        |
| BB5T        | 1430379    | 1339793  | c.1633G>A             | p.E545K       | Substitution - Missense    | 3:178936091-178936091  |
| BC32        | 1280998    | 1192289  | c.?                   | p.H1047R      | Substitution - Missense    |                        |
| BC52        | 1281018    | 1192309  | c.?                   | p.H1047R      | Substitution - Missense    |                        |
| BC60        | 1281026    | 1192317  | c.?                   | p.H1047R      | Substitution - Missense    |                        |
| BC78        | 1281044    | 1192335  | c.3140A>T             | p.H1047L      | Substitution - Missense    | 3:178952085-178952085  |
| BT20        | 1018465    | 935623   | c.3140A>G             | p.H1047R      | Substitution - Missense    | 3:178952085-178952085  |
| BT20        | 1018465    | 935623   | c.1616C>G             | p.P539R       | Substitution - Missense    | 3:178936074-178936074  |
| T47D        | 1046942    | 963173   | c.3140A>G             | p.H1047R      | Substitution - Missense    | 3:178952085-178952085  |
| MCF-7       | 1183770    | 1095741  | c.1633G>A             | p.E545K       | Substitution - Missense    | 3:178936091-178936091  |
| SA074       | 1659952    | 1574280  | c.1633G>A             | p.E545K       | Substitution - Missense    | 3:178936091-178936091  |
| SA217       | 1659987    | 1574315  | c.309_317delACCAGTAGG | p.E103_G106>D | Complex - deletion inframe | 3:178916922-178916930  |
| 104104      | 1520445    | 1442820  | c.1034A>T             | p.N345I       | Substitution - Missense    | 3:178921552-178921552  |
| 107077      | 1520523    | 1442898  | c.3140A>G             | p.H1047R      | Substitution - Missense    | 3:178952085-178952085  |
| 107395      | 1520514    | 1442889  | c.3140A>G             | p.H1047R      | Substitution - Missense    | 3:178952085-178952085  |
| 107414      | 1520599    | 1442974  | c.3140A>T             | p.H1047L      | Substitution - Missense    | 3:178952085-178952085  |
| 107535      | 1520450    | 1442825  | c.3140A>G             | p.H1047R      | Substitution - Missense    | 3:178952085-178952085  |
| 107539      | 1520462    | 1442837  | c.3140A>G             | p.H1047R      | Substitution - Missense    | 3:178952085-178952085  |
| 107738      | 1520438    | 1442813  | c.3127A>G             | p.M1043V      | Substitution - Missense    | 3:178952072-178952072  |
| 111664      | 1520561    | 1442936  | c.3140A>G             | p.H1047R      | Substitution - Missense    | 3:178952085-178952085  |
| 901515      | 901515     | 819127   | c.3140A>G             | p.H1047R      | Substitution - Missense    | 3:178952085-178952085  |
| 901517      | 901517     | 819129   | c.3140A>G             | p.H1047R      | Substitution - Missense    | 3:178952085-178952085  |
| 904403      | 904403     | 821948   | c.1035T>A             | p.N345K       | Substitution - Missense    | 3:178921553-178921553  |
| 904405      | 904405     | 821950   | c.1258T>C             | p.C420R       | Substitution - Missense    | 3:178927980-178927980  |
| 904408      | 904408     | 821953   | c.1258T>C             | p.C420R       | Substitution - Missense    | 3:178927980-178927980  |
| 904411      | 904411     | 821956   | c.1616C>G             | p.P539R       | Substitution - Missense    | 3:178936074-178936074  |
| 904414      | 904414     | 821959   | c.1624G>A             | p.E542K       | Substitution - Missense    | 3:178936082-178936082  |
| 904426      | 904426     | 821971   | c.1633G>A             | p.E545K       | Substitution - Missense    | 3:178936091-178936091  |
| 904428      | 904428     | 821973   | c.1633G>A             | p.E545K       | Substitution - Missense    | 3:178936091-178936091  |
| 904433      | 904433     | 821978   | c.1633G>A             | p.E545K       | Substitution - Missense    | 3:178936091-178936091  |
| 904439      | 904439     | 821984   | c.3127A>G             | p.M1043V      | Substitution - Missense    | 3:178952072-178952072  |
| 904445      | 904445     | 821990   | c.3140A>G             | p.H1047R      | Substitution - Missense    | 3:178952085-178952085  |
| 904449      | 904449     | 821994   | c.3140A>G             | p.H1047R      | Substitution - Missense    | 3:178952085-178952085  |
| 904451      | 904451     | 821996   | c.3140A>G             | p.H1047R      | Substitution - Missense    | 3:178952085-178952085  |
| 904453      | 904453     | 821998   | c.3140A>G             | p.H1047R      | Substitution - Missense    | 3:178952085-178952085  |
| 904460      | 904460     | 822005   | c.3140A>G             | p.H1047R      | Substitution - Missense    | 3:178952085-178952085  |
| 904470      | 904470     | 822015   | c.3140A>G             | p.H1047R      | Substitution - Missense    | 3:178952085-178952085  |
| 904471      | 904471     | 822016   | c.3140A>G             | p.H1047R      | Substitution - Missense    | 3:178952085-178952085  |

|         |         |         |           |          |                              |                       |
|---------|---------|---------|-----------|----------|------------------------------|-----------------------|
| 904472  | 904472  | 822017  | c.3140A>T | p.H1047L | Substitution - Missense      | 3:178952085-178952085 |
| 904476  | 904476  | 822021  | c.3145G>C | p.G1049R | Substitution - Missense      | 3:178952090-178952090 |
| BT-483  | 904352  | 821897  | c.1624G>A | p.E542K  | Substitution - Missense      | 3:178936082-178936082 |
| E28511  | 762928  | 684108  | c.3140A>G | p.H1047R | Substitution - Missense      | 3:178952085-178952085 |
| E39838  | 894049  | 811817  | c.3140A>G | p.H1047R | Substitution - Missense      | 3:178952085-178952085 |
| E39852  | 894063  | 811831  | c.3140A>G | p.H1047R | Substitution - Missense      | 3:178952085-178952085 |
| E39867  | 894078  | 811846  | c.328G>A  | p.E110K  | Substitution - Missense      | 3:178916941-178916941 |
| E40045  | 894097  | 811865  | c.1214C>T | p.S405F  | Substitution - Missense      | 3:178927451-178927451 |
| E40047  | 894099  | 811867  | c.1258T>C | p.C420R  | Substitution - Missense      | 3:178927980-178927980 |
| E40053  | 894105  | 811873  | c.1624G>A | p.E542K  | Substitution - Missense      | 3:178936082-178936082 |
| E40058  | 894110  | 811878  | c.1633G>A | p.E545K  | Substitution - Missense      | 3:178936091-178936091 |
| EFM-19  | 2165019 | 2033431 | c.?       | p.H1047L | Substitution - Missense      |                       |
| HCC202  | 2165008 | 2033420 | c.?       | p.E545K  | Substitution - Missense      |                       |
| 1017175 | 1017175 | 934345  | c.1624G>A | p.E542K  | Substitution - Missense      | 3:178936082-178936082 |
| 1017180 | 1017180 | 934350  | c.1633G>A | p.E545K  | Substitution - Missense      | 3:178936091-178936091 |
| 1017182 | 1017182 | 934352  | c.1633G>A | p.E545K  | Substitution - Missense      | 3:178936091-178936091 |
| 1017186 | 1017186 | 934356  | c.1634A>G | p.E545G  | Substitution - Missense      | 3:178936092-178936092 |
| 1017187 | 1017187 | 934357  | c.3140A>G | p.H1047R | Substitution - Missense      | 3:178952085-178952085 |
| 1017842 | 1017842 | 935000  | c.1633G>A | p.E545K  | Substitution - Missense      | 3:178936091-178936091 |
| 1017846 | 1017846 | 935004  | c.1633G>A | p.E545K  | Substitution - Missense      | 3:178936091-178936091 |
| 1017849 | 1017849 | 935007  | c.3140A>G | p.H1047R | Substitution - Missense      | 3:178952085-178952085 |
| 1017852 | 1017852 | 935010  | c.3140A>G | p.H1047R | Substitution - Missense      | 3:178952085-178952085 |
| 1017855 | 1017855 | 935013  | c.3140A>G | p.H1047R | Substitution - Missense      | 3:178952085-178952085 |
| 1017856 | 1017856 | 935014  | c.3140A>G | p.H1047R | Substitution - Missense      | 3:178952085-178952085 |
| 1017894 | 1017894 | 935052  | c.3140A>G | p.H1047R | Substitution - Missense      | 3:178952085-178952085 |
| 1018387 | 1018387 | 935545  | c.3140A>G | p.H1047R | Substitution - Missense      | 3:178952085-178952085 |
| 1018391 | 1018391 | 935549  | c.3140A>G | p.H1047R | Substitution - Missense      | 3:178952085-178952085 |
| 1018397 | 1018397 | 935555  | c.3140A>G | p.H1047R | Substitution - Missense      | 3:178952085-178952085 |
| 1018402 | 1018402 | 935560  | c.1634A>C | p.E545A  | Substitution - Missense      | 3:178936092-178936092 |
| 1018405 | 1018405 | 935563  | c.1634A>C | p.E545A  | Substitution - Missense      | 3:178936092-178936092 |
| 1018408 | 1018408 | 935566  | c.1634A>C | p.E545A  | Substitution - Missense      | 3:178936092-178936092 |
| 1018410 | 1018410 | 935568  | c.1634A>C | p.E545A  | Substitution - Missense      | 3:178936092-178936092 |
| 1018911 | 1018911 | 935934  | c.3075C>T | p.T1025T | Substitution - coding silent | 3:178952020-178952020 |
| 1018915 | 1018915 | 935938  | c.1624G>A | p.E542K  | Substitution - Missense      | 3:178936082-178936082 |
| 1018920 | 1018920 | 935943  | c.1634A>G | p.E545G  | Substitution - Missense      | 3:178936092-178936092 |
| 1122682 | 1122682 | 1035726 | c.3140A>G | p.H1047R | Substitution - Missense      | 3:178952085-178952085 |
| 1122687 | 1122687 | 1035731 | c.3140A>G | p.H1047R | Substitution - Missense      | 3:178952085-178952085 |
| 1124114 | 1124114 | 1037157 | c.3140A>T | p.H1047L | Substitution - Missense      | 3:178952085-178952085 |
| 1124237 | 1124237 | 1037280 | c.1624G>A | p.E542K  | Substitution - Missense      | 3:178936082-178936082 |
| 1124246 | 1124246 | 1037289 | c.1636C>G | p.Q546E  | Substitution - Missense      | 3:178936094-178936094 |
| 1124256 | 1124256 | 1037299 | c.3140A>G | p.H1047R | Substitution - Missense      | 3:178952085-178952085 |
| 1124263 | 1124263 | 1037306 | c.3140A>G | p.H1047R | Substitution - Missense      | 3:178952085-178952085 |
| 1124383 | 1124383 | 1037426 | c.1624G>A | p.E542K  | Substitution - Missense      | 3:178936082-178936082 |

|         |         |         |           |          |                         |                       |
|---------|---------|---------|-----------|----------|-------------------------|-----------------------|
| 1124387 | 1124387 | 1037430 | c.1624G>A | p.E542K  | Substitution - Missense | 3:178936082-178936082 |
| 1124400 | 1124400 | 1037443 | c.1633G>A | p.E545K  | Substitution - Missense | 3:178936091-178936091 |
| 1124403 | 1124403 | 1037446 | c.1633G>A | p.E545K  | Substitution - Missense | 3:178936091-178936091 |
| 1124404 | 1124404 | 1037447 | c.1633G>A | p.E545K  | Substitution - Missense | 3:178936091-178936091 |
| 1124405 | 1124405 | 1037448 | c.1634A>G | p.E545G  | Substitution - Missense | 3:178936092-178936092 |
| 1124416 | 1124416 | 1037459 | c.3140A>G | p.H1047R | Substitution - Missense | 3:178952085-178952085 |
| 1124421 | 1124421 | 1037464 | c.3140A>G | p.H1047R | Substitution - Missense | 3:178952085-178952085 |
| 1124425 | 1124425 | 1037468 | c.3140A>T | p.H1047L | Substitution - Missense | 3:178952085-178952085 |
| 1124601 | 1124601 | 1037644 | c.3140A>G | p.H1047R | Substitution - Missense | 3:178952085-178952085 |
| 1124604 | 1124604 | 1037647 | c.3140A>G | p.H1047R | Substitution - Missense | 3:178952085-178952085 |
| 1124609 | 1124609 | 1037652 | c.3140A>T | p.H1047L | Substitution - Missense | 3:178952085-178952085 |
| 1124612 | 1124612 | 1037655 | c.1633G>A | p.E545K  | Substitution - Missense | 3:178936091-178936091 |
| 1134424 | 1134424 | 1047084 | c.3140A>G | p.H1047R | Substitution - Missense | 3:178952085-178952085 |
| 1134433 | 1134433 | 1047093 | c.1633G>A | p.E545K  | Substitution - Missense | 3:178936091-178936091 |
| 1134439 | 1134439 | 1047099 | c.1633G>A | p.E545K  | Substitution - Missense | 3:178936091-178936091 |
| 1135797 | 1135797 | 1048361 | c.3140A>G | p.H1047R | Substitution - Missense | 3:178952085-178952085 |
| 1135799 | 1135799 | 1048363 | c.3140A>G | p.H1047R | Substitution - Missense | 3:178952085-178952085 |
| 1135805 | 1135805 | 1048369 | c.3140A>G | p.H1047R | Substitution - Missense | 3:178952085-178952085 |
| 1135812 | 1135812 | 1048376 | c.3140A>G | p.H1047R | Substitution - Missense | 3:178952085-178952085 |
| 1135814 | 1135814 | 1048378 | c.3140A>G | p.H1047R | Substitution - Missense | 3:178952085-178952085 |
| 1135818 | 1135818 | 1048382 | c.3140A>G | p.H1047R | Substitution - Missense | 3:178952085-178952085 |
| 1135824 | 1135824 | 1048388 | c.3140A>G | p.H1047R | Substitution - Missense | 3:178952085-178952085 |
| 1135826 | 1135826 | 1048390 | c.3140A>G | p.H1047R | Substitution - Missense | 3:178952085-178952085 |
| 1135830 | 1135830 | 1048394 | c.3140A>G | p.H1047R | Substitution - Missense | 3:178952085-178952085 |
| 1135849 | 1135849 | 1048413 | c.3140A>G | p.H1047R | Substitution - Missense | 3:178952085-178952085 |
| 1135851 | 1135851 | 1048415 | c.3140A>G | p.H1047R | Substitution - Missense | 3:178952085-178952085 |
| 1135857 | 1135857 | 1048421 | c.3140A>G | p.H1047R | Substitution - Missense | 3:178952085-178952085 |
| 1135862 | 1135862 | 1048426 | c.3140A>T | p.H1047L | Substitution - Missense | 3:178952085-178952085 |
| 1135868 | 1135868 | 1048432 | c.1633G>A | p.E545K  | Substitution - Missense | 3:178936091-178936091 |
| 1135876 | 1135876 | 1048440 | c.1633G>A | p.E545K  | Substitution - Missense | 3:178936091-178936091 |
| 1135886 | 1135886 | 1048450 | c.1633G>A | p.E545K  | Substitution - Missense | 3:178936091-178936091 |
| 1135887 | 1135887 | 1048451 | c.1633G>A | p.E545K  | Substitution - Missense | 3:178936091-178936091 |
| 1135892 | 1135892 | 1048456 | c.1633G>A | p.E545K  | Substitution - Missense | 3:178936091-178936091 |
| 1135895 | 1135895 | 1048459 | c.1633G>A | p.E545K  | Substitution - Missense | 3:178936091-178936091 |
| 1135904 | 1135904 | 1048468 | c.1035T>A | p.N345K  | Substitution - Missense | 3:178921553-178921553 |
| 1176653 | 1176653 | 1088650 | c.3140A>G | p.H1047R | Substitution - Missense | 3:178952085-178952085 |
| 1176654 | 1176654 | 1088651 | c.3140A>G | p.H1047R | Substitution - Missense | 3:178952085-178952085 |
| 1176657 | 1176657 | 1088654 | c.3140A>G | p.H1047R | Substitution - Missense | 3:178952085-178952085 |
| 1176680 | 1176680 | 1088677 | c.1633G>A | p.E545K  | Substitution - Missense | 3:178936091-178936091 |
| 1193503 | 1193503 | 1105399 | c.?       | p.H1047R | Substitution - Missense |                       |
| 1193513 | 1193513 | 1105409 | c.?       | p.H1047R | Substitution - Missense |                       |
| 1193514 | 1193514 | 1105410 | c.?       | p.H1047R | Substitution - Missense |                       |
| 1193520 | 1193520 | 1105416 | c.?       | p.H1047R | Substitution - Missense |                       |

|         |         |         |           |          |                         |                       |
|---------|---------|---------|-----------|----------|-------------------------|-----------------------|
| 1193521 | 1193521 | 1105417 | c.?       | p.H1047R | Substitution - Missense |                       |
| 1193524 | 1193524 | 1105420 | c.?       | p.H1047R | Substitution - Missense |                       |
| 1193529 | 1193529 | 1105425 | c.?       | p.H1047R | Substitution - Missense |                       |
| 1193541 | 1193541 | 1105437 | c.?       | p.H1047R | Substitution - Missense |                       |
| 1193542 | 1193542 | 1105438 | c.?       | p.H1047R | Substitution - Missense |                       |
| 1193543 | 1193543 | 1105439 | c.?       | p.H1047R | Substitution - Missense |                       |
| 1193549 | 1193549 | 1105445 | c.?       | p.G1049R | Substitution - Missense |                       |
| 1193553 | 1193553 | 1105449 | c.?       | p.E545K  | Substitution - Missense |                       |
| 1193555 | 1193555 | 1105451 | c.?       | p.E545K  | Substitution - Missense |                       |
| 1193564 | 1193564 | 1105460 | c.?       | p.E545K  | Substitution - Missense |                       |
| 1193568 | 1193568 | 1105464 | c.?       | p.E545K  | Substitution - Missense |                       |
| 1193571 | 1193571 | 1105467 | c.?       | p.E542K  | Substitution - Missense |                       |
| 1212751 | 1212751 | 1124618 | c.3140A>G | p.H1047R | Substitution - Missense | 3:178952085-178952085 |
| 1212752 | 1212752 | 1124619 | c.3140A>G | p.H1047R | Substitution - Missense | 3:178952085-178952085 |
| 1212753 | 1212753 | 1124620 | c.3140A>G | p.H1047R | Substitution - Missense | 3:178952085-178952085 |
| 1212765 | 1212765 | 1124632 | c.3140A>G | p.H1047R | Substitution - Missense | 3:178952085-178952085 |
| 1244777 | 1244777 | 1156483 | c.1258T>C | p.C420R  | Substitution - Missense | 3:178927980-178927980 |
| 1244781 | 1244781 | 1156487 | c.1258T>C | p.C420R  | Substitution - Missense | 3:178927980-178927980 |
| 1244783 | 1244783 | 1156489 | c.1624G>A | p.E542K  | Substitution - Missense | 3:178936082-178936082 |
| 1244788 | 1244788 | 1156494 | c.1624G>A | p.E542K  | Substitution - Missense | 3:178936082-178936082 |
| 1244791 | 1244791 | 1156497 | c.1624G>A | p.E542K  | Substitution - Missense | 3:178936082-178936082 |
| 1244795 | 1244795 | 1156501 | c.1624G>A | p.E542K  | Substitution - Missense | 3:178936082-178936082 |
| 1244804 | 1244804 | 1156510 | c.1624G>A | p.E542K  | Substitution - Missense | 3:178936082-178936082 |
| 1244810 | 1244810 | 1156516 | c.1633G>A | p.E545K  | Substitution - Missense | 3:178936091-178936091 |
| 1244815 | 1244815 | 1156521 | c.1633G>A | p.E545K  | Substitution - Missense | 3:178936091-178936091 |
| 1244819 | 1244819 | 1156525 | c.1633G>A | p.E545K  | Substitution - Missense | 3:178936091-178936091 |
| 1244830 | 1244830 | 1156536 | c.1633G>A | p.E545K  | Substitution - Missense | 3:178936091-178936091 |
| 1244831 | 1244831 | 1156537 | c.1633G>A | p.E545K  | Substitution - Missense | 3:178936091-178936091 |
| 1244836 | 1244836 | 1156542 | c.1633G>A | p.E545K  | Substitution - Missense | 3:178936091-178936091 |
| 1244843 | 1244843 | 1156549 | c.1634A>C | p.E545A  | Substitution - Missense | 3:178936092-178936092 |
| 1244847 | 1244847 | 1156553 | c.1634A>G | p.E545G  | Substitution - Missense | 3:178936092-178936092 |
| 1244860 | 1244860 | 1156566 | c.3140A>T | p.H1047L | Substitution - Missense | 3:178952085-178952085 |
| 1244865 | 1244865 | 1156571 | c.3140A>T | p.H1047L | Substitution - Missense | 3:178952085-178952085 |
| 1244868 | 1244868 | 1156574 | c.3140A>G | p.H1047R | Substitution - Missense | 3:178952085-178952085 |
| 1244869 | 1244869 | 1156575 | c.3140A>G | p.H1047R | Substitution - Missense | 3:178952085-178952085 |
| 1244870 | 1244870 | 1156576 | c.3140A>G | p.H1047R | Substitution - Missense | 3:178952085-178952085 |
| 1244872 | 1244872 | 1156578 | c.3140A>G | p.H1047R | Substitution - Missense | 3:178952085-178952085 |
| 1244878 | 1244878 | 1156584 | c.3140A>G | p.H1047R | Substitution - Missense | 3:178952085-178952085 |
| 1244888 | 1244888 | 1156594 | c.3140A>G | p.H1047R | Substitution - Missense | 3:178952085-178952085 |
| 1244889 | 1244889 | 1156595 | c.3140A>G | p.H1047R | Substitution - Missense | 3:178952085-178952085 |
| 1244892 | 1244892 | 1156598 | c.3140A>G | p.H1047R | Substitution - Missense | 3:178952085-178952085 |
| 1244895 | 1244895 | 1156601 | c.3140A>G | p.H1047R | Substitution - Missense | 3:178952085-178952085 |
| 1244915 | 1244915 | 1156621 | c.3140A>G | p.H1047R | Substitution - Missense | 3:178952085-178952085 |

|         |         |         |           |          |                         |                       |
|---------|---------|---------|-----------|----------|-------------------------|-----------------------|
| 1244923 | 1244923 | 1156629 | c.3140A>G | p.H1047R | Substitution - Missense | 3:178952085-178952085 |
| 1244936 | 1244936 | 1156642 | c.3140A>G | p.H1047R | Substitution - Missense | 3:178952085-178952085 |
| 1244943 | 1244943 | 1156649 | c.3140A>G | p.H1047R | Substitution - Missense | 3:178952085-178952085 |
| 1278872 | 1278872 | 1190168 | c.?       | p.E545K  | Substitution - Missense |                       |
| 1278875 | 1278875 | 1190171 | c.?       | p.H1047R | Substitution - Missense |                       |
| 1278879 | 1278879 | 1190175 | c.?       | p.H1047R | Substitution - Missense |                       |
| 1297167 | 1297167 | 1208221 | c.?       | p.E542K  | Substitution - Missense |                       |
| 1301924 | 1301924 | 1212975 | c.1624G>A | p.E542K  | Substitution - Missense | 3:178936082-178936082 |
| 1301927 | 1301927 | 1212978 | c.1624G>A | p.E542K  | Substitution - Missense | 3:178936082-178936082 |
| 1301937 | 1301937 | 1212988 | c.1633G>A | p.E545K  | Substitution - Missense | 3:178936091-178936091 |
| 1301959 | 1301959 | 1213010 | c.3140A>G | p.H1047R | Substitution - Missense | 3:178952085-178952085 |
| 1301960 | 1301960 | 1213011 | c.3140A>G | p.H1047R | Substitution - Missense | 3:178952085-178952085 |
| 1301961 | 1301961 | 1213012 | c.3140A>G | p.H1047R | Substitution - Missense | 3:178952085-178952085 |
| 1301964 | 1301964 | 1213015 | c.3140A>G | p.H1047R | Substitution - Missense | 3:178952085-178952085 |
| 1301968 | 1301968 | 1213019 | c.3140A>G | p.H1047R | Substitution - Missense | 3:178952085-178952085 |
| 1301974 | 1301974 | 1213025 | c.3140A>G | p.H1047R | Substitution - Missense | 3:178952085-178952085 |
| 1301982 | 1301982 | 1213033 | c.3143A>G | p.H1048R | Substitution - Missense | 3:178952088-178952088 |
| 1301982 | 1301982 | 1213033 | c.3140A>G | p.H1047R | Substitution - Missense | 3:178952085-178952085 |
| 1302097 | 1302097 | 1213148 | c.3140A>G | p.H1047R | Substitution - Missense | 3:178952085-178952085 |
| 1312215 | 1312215 | 1223124 | c.?       | p.H1047R | Substitution - Missense |                       |
| 1312221 | 1312221 | 1223130 | c.?       | p.H1047R | Substitution - Missense |                       |
| 1312225 | 1312225 | 1223134 | c.?       | p.E545K  | Substitution - Missense |                       |
| 1312246 | 1312246 | 1223155 | c.?       | p.H1047L | Substitution - Missense |                       |
| 1312247 | 1312247 | 1223156 | c.?       | p.E545K  | Substitution - Missense |                       |
| 1321112 | 1321112 | 1231999 | c.1624G>A | p.E542K  | Substitution - Missense | 3:178936082-178936082 |
| 1321116 | 1321116 | 1232003 | c.1624G>A | p.E542K  | Substitution - Missense | 3:178936082-178936082 |
| 1321130 | 1321130 | 1232017 | c.3140A>G | p.H1047R | Substitution - Missense | 3:178952085-178952085 |
| 1321135 | 1321135 | 1232022 | c.3140A>G | p.H1047R | Substitution - Missense | 3:178952085-178952085 |
| 1329566 | 1329566 | 1240051 | c.1624G>A | p.E542K  | Substitution - Missense | 3:178936082-178936082 |
| 1329574 | 1329574 | 1240059 | c.1633G>A | p.E545K  | Substitution - Missense | 3:178936091-178936091 |
| 1329587 | 1329587 | 1240072 | c.3140A>G | p.H1047R | Substitution - Missense | 3:178952085-178952085 |
| 1329589 | 1329589 | 1240074 | c.3140A>G | p.H1047R | Substitution - Missense | 3:178952085-178952085 |
| 1329590 | 1329590 | 1240075 | c.3140A>G | p.H1047R | Substitution - Missense | 3:178952085-178952085 |
| 1329591 | 1329591 | 1240076 | c.3140A>G | p.H1047R | Substitution - Missense | 3:178952085-178952085 |
| 1329592 | 1329592 | 1240077 | c.3140A>G | p.H1047R | Substitution - Missense | 3:178952085-178952085 |
| 1329593 | 1329593 | 1240078 | c.3140A>G | p.H1047R | Substitution - Missense | 3:178952085-178952085 |
| 1329604 | 1329604 | 1240089 | c.3140A>G | p.H1047R | Substitution - Missense | 3:178952085-178952085 |
| 1329607 | 1329607 | 1240092 | c.3140A>G | p.H1047R | Substitution - Missense | 3:178952085-178952085 |
| 1329720 | 1329720 | 1240205 | c.1633G>A | p.E545K  | Substitution - Missense | 3:178936091-178936091 |
| 1329721 | 1329721 | 1240206 | c.1633G>A | p.E545K  | Substitution - Missense | 3:178936091-178936091 |
| 1329722 | 1329722 | 1240207 | c.1633G>A | p.E545K  | Substitution - Missense | 3:178936091-178936091 |
| 1329725 | 1329725 | 1240210 | c.1624G>A | p.E542K  | Substitution - Missense | 3:178936082-178936082 |
| 1329727 | 1329727 | 1240212 | c.1636C>A | p.Q546K  | Substitution - Missense | 3:178936094-178936094 |

|         |         |         |           |          |                         |                       |
|---------|---------|---------|-----------|----------|-------------------------|-----------------------|
| 1329732 | 1329732 | 1240217 | c.3140A>G | p.H1047R | Substitution - Missense | 3:178952085-178952085 |
| 1329735 | 1329735 | 1240220 | c.3140A>G | p.H1047R | Substitution - Missense | 3:178952085-178952085 |
| 1329737 | 1329737 | 1240222 | c.3140A>G | p.H1047R | Substitution - Missense | 3:178952085-178952085 |
| 1329744 | 1329744 | 1240229 | c.3140A>G | p.H1047R | Substitution - Missense | 3:178952085-178952085 |
| 1329752 | 1329752 | 1240237 | c.3139C>T | p.H1047Y | Substitution - Missense | 3:178952084-178952084 |
| 1329813 | 1329813 | 1240298 | c.1624G>A | p.E542K  | Substitution - Missense | 3:178936082-178936082 |
| 1329817 | 1329817 | 1240302 | c.1633G>A | p.E545K  | Substitution - Missense | 3:178936091-178936091 |
| 1329818 | 1329818 | 1240303 | c.1633G>A | p.E545K  | Substitution - Missense | 3:178936091-178936091 |
| 1329826 | 1329826 | 1240311 | c.3140A>G | p.H1047R | Substitution - Missense | 3:178952085-178952085 |
| 1329904 | 1329904 | 1240389 | c.3140A>G | p.H1047R | Substitution - Missense | 3:178952085-178952085 |
| 1329907 | 1329907 | 1240392 | c.3140A>G | p.H1047R | Substitution - Missense | 3:178952085-178952085 |
| 1419228 | 1419228 | 1329269 | c.3140A>G | p.H1047R | Substitution - Missense | 3:178952085-178952085 |
| 1419232 | 1419232 | 1329273 | c.3140A>G | p.H1047R | Substitution - Missense | 3:178952085-178952085 |
| 1419233 | 1419233 | 1329274 | c.3140A>G | p.H1047R | Substitution - Missense | 3:178952085-178952085 |
| 1419237 | 1419237 | 1329278 | c.3140A>G | p.H1047R | Substitution - Missense | 3:178952085-178952085 |
| 1419238 | 1419238 | 1329279 | c.3140A>G | p.H1047R | Substitution - Missense | 3:178952085-178952085 |
| 1419240 | 1419240 | 1329281 | c.3140A>G | p.H1047R | Substitution - Missense | 3:178952085-178952085 |
| 1419255 | 1419255 | 1329296 | c.3140A>T | p.H1047L | Substitution - Missense | 3:178952085-178952085 |
| 1419256 | 1419256 | 1329297 | c.3140A>T | p.H1047L | Substitution - Missense | 3:178952085-178952085 |
| 1419257 | 1419257 | 1329298 | c.3140A>T | p.H1047L | Substitution - Missense | 3:178952085-178952085 |
| 1419269 | 1419269 | 1329310 | c.1624G>A | p.E542K  | Substitution - Missense | 3:178936082-178936082 |
| 1419270 | 1419270 | 1329311 | c.1624G>A | p.E542K  | Substitution - Missense | 3:178936082-178936082 |
| 1425136 | 1425136 | 1335164 | c.?       | p.E545K  | Substitution - Missense |                       |
| 1425160 | 1425160 | 1335188 | c.?       | p.H1047R | Substitution - Missense |                       |
| 1425161 | 1425161 | 1335189 | c.?       | p.H1047R | Substitution - Missense |                       |
| 1425172 | 1425172 | 1335200 | c.?       | p.R38H   | Substitution - Missense |                       |
| 1435082 | 1435082 | 1344440 | c.?       | p.H1047R | Substitution - Missense |                       |
| 1435084 | 1435084 | 1344442 | c.?       | p.E545K  | Substitution - Missense |                       |
| 1443608 | 1443608 | 1367853 | c.?       | p.H1047R | Substitution - Missense |                       |
| 1443610 | 1443610 | 1367855 | c.?       | p.H1047R | Substitution - Missense |                       |
| 1443623 | 1443623 | 1367868 | c.?       | p.H1047R | Substitution - Missense |                       |
| 1443636 | 1443636 | 1367881 | c.?       | p.H1047R | Substitution - Missense |                       |
| 1443697 | 1443697 | 1367942 | c.?       | p.E542K  | Substitution - Missense |                       |
| 1443702 | 1443702 | 1367947 | c.?       | p.H1047L | Substitution - Missense |                       |
| 1443706 | 1443706 | 1367951 | c.?       | p.H1047R | Substitution - Missense |                       |
| 1443718 | 1443718 | 1367963 | c.?       | p.H1047R | Substitution - Missense |                       |
| 1443719 | 1443719 | 1367964 | c.?       | p.H1047R | Substitution - Missense |                       |
| 1443720 | 1443720 | 1367965 | c.?       | p.H1047R | Substitution - Missense |                       |
| 1443723 | 1443723 | 1367968 | c.?       | p.H1047R | Substitution - Missense |                       |
| 1443727 | 1443727 | 1367972 | c.?       | p.H1047R | Substitution - Missense |                       |
| 1443729 | 1443729 | 1367974 | c.?       | p.H1047R | Substitution - Missense |                       |
| 1443747 | 1443747 | 1367992 | c.?       | p.H1047R | Substitution - Missense |                       |
| 1443751 | 1443751 | 1367996 | c.?       | p.H1047R | Substitution - Missense |                       |

|         |         |         |           |          |                         |                       |
|---------|---------|---------|-----------|----------|-------------------------|-----------------------|
| 1443752 | 1443752 | 1367997 | c.?       | p.H1047R | Substitution - Missense |                       |
| 1443910 | 1443910 | 1368155 | c.?       | p.H1047R | Substitution - Missense |                       |
| 1443911 | 1443911 | 1368156 | c.?       | p.H1047R | Substitution - Missense |                       |
| 1530111 | 1530111 | 1452483 | c.1633G>A | p.E545K  | Substitution - Missense | 3:178936091-178936091 |
| 1530127 | 1530127 | 1452499 | c.1633G>A | p.E545K  | Substitution - Missense | 3:178936091-178936091 |
| 1657027 | 1657027 | 1571682 | c.3140A>G | p.H1047R | Substitution - Missense | 3:178952085-178952085 |
| 1657028 | 1657028 | 1571683 | c.3140A>G | p.H1047R | Substitution - Missense | 3:178952085-178952085 |
| 1657030 | 1657030 | 1571685 | c.3140A>G | p.H1047R | Substitution - Missense | 3:178952085-178952085 |
| 1657032 | 1657032 | 1571687 | c.3140A>G | p.H1047R | Substitution - Missense | 3:178952085-178952085 |
| 1657035 | 1657035 | 1571690 | c.3140A>G | p.H1047R | Substitution - Missense | 3:178952085-178952085 |
| 1657039 | 1657039 | 1571694 | c.3140A>G | p.H1047R | Substitution - Missense | 3:178952085-178952085 |
| 1657041 | 1657041 | 1571696 | c.3140A>G | p.H1047R | Substitution - Missense | 3:178952085-178952085 |
| 1657042 | 1657042 | 1571697 | c.3140A>G | p.H1047R | Substitution - Missense | 3:178952085-178952085 |
| 1657043 | 1657043 | 1571698 | c.3140A>G | p.H1047R | Substitution - Missense | 3:178952085-178952085 |
| 1657046 | 1657046 | 1571701 | c.3140A>G | p.H1047R | Substitution - Missense | 3:178952085-178952085 |
| 1657047 | 1657047 | 1571702 | c.3140A>G | p.H1047R | Substitution - Missense | 3:178952085-178952085 |
| 1659239 | 1659239 | 1573569 | c.3140A>G | p.H1047R | Substitution - Missense | 3:178952085-178952085 |
| 1659240 | 1659240 | 1573570 | c.3145G>C | p.G1049R | Substitution - Missense | 3:178952090-178952090 |
| 1665032 | 1665032 | 1578482 | c.3154A>G | p.T1052A | Substitution - Missense | 3:178952099-178952099 |
| 1670194 | 1670194 | 1583480 | c.1633G>A | p.E545K  | Substitution - Missense | 3:178936091-178936091 |
| 1670195 | 1670195 | 1583481 | c.1633G>A | p.E545K  | Substitution - Missense | 3:178936091-178936091 |
| 1670197 | 1670197 | 1583483 | c.1624G>A | p.E542K  | Substitution - Missense | 3:178936082-178936082 |
| 1670201 | 1670201 | 1583487 | c.1634A>C | p.E545A  | Substitution - Missense | 3:178936092-178936092 |
| 1670206 | 1670206 | 1583492 | c.3140A>G | p.H1047R | Substitution - Missense | 3:178952085-178952085 |
| 1670210 | 1670210 | 1583496 | c.3140A>G | p.H1047R | Substitution - Missense | 3:178952085-178952085 |
| 1670218 | 1670218 | 1583504 | c.3140A>G | p.H1047R | Substitution - Missense | 3:178952085-178952085 |
| 1670219 | 1670219 | 1583505 | c.3140A>G | p.H1047R | Substitution - Missense | 3:178952085-178952085 |
| 1670300 | 1670300 | 1583586 | c.1633G>A | p.E545K  | Substitution - Missense | 3:178936091-178936091 |
| 1670303 | 1670303 | 1583589 | c.1624G>A | p.E542K  | Substitution - Missense | 3:178936082-178936082 |
| 1670304 | 1670304 | 1583590 | c.3136G>A | p.A1046T | Substitution - Missense | 3:178952081-178952081 |
| 1670304 | 1670304 | 1583590 | c.1636C>G | p.Q546E  | Substitution - Missense | 3:178936094-178936094 |
| 1670320 | 1670320 | 1583606 | c.3140A>G | p.H1047R | Substitution - Missense | 3:178952085-178952085 |
| 1670322 | 1670322 | 1583608 | c.3140A>G | p.H1047R | Substitution - Missense | 3:178952085-178952085 |
| 1675739 | 1675739 | 1588616 | c.3140A>G | p.H1047R | Substitution - Missense | 3:178952085-178952085 |
| 1675750 | 1675750 | 1588621 | c.3140A>G | p.H1047R | Substitution - Missense | 3:178952085-178952085 |
| 1675754 | 1675754 | 1588623 | c.3140A>G | p.H1047R | Substitution - Missense | 3:178952085-178952085 |
| 1676176 | 1676176 | 1588948 | c.?       | p.H1047R | Substitution - Missense |                       |
| 1676260 | 1676260 | 1589032 | c.?       | p.H1047R | Substitution - Missense |                       |
| 1676261 | 1676261 | 1589033 | c.?       | p.H1047R | Substitution - Missense |                       |
| 1676276 | 1676276 | 1589048 | c.?       | p.E545K  | Substitution - Missense |                       |
| 1676276 | 1676276 | 1589048 | c.?       | p.H1047R | Substitution - Missense |                       |
| 1691697 | 1691697 | 1599963 | c.?       | p.E545K  | Substitution - Missense |                       |
| 1691700 | 1691700 | 1599966 | c.?       | p.E545K  | Substitution - Missense |                       |

|         |         |         |           |          |                         |                       |
|---------|---------|---------|-----------|----------|-------------------------|-----------------------|
| 1691701 | 1691701 | 1599967 | c.?       | p.E545K  | Substitution - Missense |                       |
| 1691702 | 1691702 | 1599968 | c.?       | p.E545K  | Substitution - Missense |                       |
| 1691708 | 1691708 | 1599974 | c.?       | p.H1047R | Substitution - Missense |                       |
| 1691712 | 1691712 | 1599978 | c.?       | p.H1047R | Substitution - Missense |                       |
| 1691735 | 1691735 | 1600001 | c.?       | p.H1047R | Substitution - Missense |                       |
| 1691737 | 1691737 | 1600003 | c.?       | p.H1047R | Substitution - Missense |                       |
| 1691739 | 1691739 | 1600005 | c.?       | p.H1047R | Substitution - Missense |                       |
| 1691742 | 1691742 | 1600008 | c.?       | p.H1047R | Substitution - Missense |                       |
| 1691744 | 1691744 | 1600010 | c.?       | p.H1047R | Substitution - Missense |                       |
| 1692039 | 1692039 | 1600304 | c.3140A>G | p.H1047R | Substitution - Missense | 3:178952085-178952085 |
| 1692051 | 1692051 | 1600316 | c.1624G>A | p.E542K  | Substitution - Missense | 3:178936082-178936082 |
| 1698509 | 1698509 | 1606627 | c.1634A>C | p.E545A  | Substitution - Missense | 3:178936092-178936092 |
| 1698513 | 1698513 | 1606631 | c.3140A>G | p.H1047R | Substitution - Missense | 3:178952085-178952085 |
| 1698522 | 1698522 | 1606640 | c.1624G>A | p.E542K  | Substitution - Missense | 3:178936082-178936082 |
| 1698530 | 1698530 | 1606648 | c.3139C>T | p.H1047Y | Substitution - Missense | 3:178952084-178952084 |
| 1698534 | 1698534 | 1606652 | c.1634A>C | p.E545A  | Substitution - Missense | 3:178936092-178936092 |
| 1698537 | 1698537 | 1606655 | c.1624G>A | p.E542K  | Substitution - Missense | 3:178936082-178936082 |
| 1698836 | 1698836 | 1606954 | c.?       | p.E542K  | Substitution - Missense |                       |
| 1698841 | 1698841 | 1606959 | c.?       | p.E542K  | Substitution - Missense |                       |
| 1698846 | 1698846 | 1606964 | c.?       | p.E545K  | Substitution - Missense |                       |
| 1698848 | 1698848 | 1606966 | c.?       | p.E545K  | Substitution - Missense |                       |
| 1698855 | 1698855 | 1606973 | c.3140A>G | p.H1047R | Substitution - Missense | 3:178952085-178952085 |
| 1698858 | 1698858 | 1606976 | c.3140A>G | p.H1047R | Substitution - Missense | 3:178952085-178952085 |
| 1698863 | 1698863 | 1606981 | c.3140A>G | p.H1047R | Substitution - Missense | 3:178952085-178952085 |
| 1698864 | 1698864 | 1606982 | c.3140A>G | p.H1047R | Substitution - Missense | 3:178952085-178952085 |
| 1698865 | 1698865 | 1606983 | c.3140A>G | p.H1047R | Substitution - Missense | 3:178952085-178952085 |
| 1698874 | 1698874 | 1606992 | c.3140A>G | p.H1047R | Substitution - Missense | 3:178952085-178952085 |
| 1698890 | 1698890 | 1607008 | c.?       | p.H1047L | Substitution - Missense |                       |
| 1703719 | 1703719 | 1611828 | c.1634A>C | p.E545A  | Substitution - Missense | 3:178936092-178936092 |
| 1703727 | 1703727 | 1611836 | c.1624G>A | p.E542K  | Substitution - Missense | 3:178936082-178936082 |
| 1703730 | 1703730 | 1611839 | c.1624G>A | p.E542K  | Substitution - Missense | 3:178936082-178936082 |
| 1703737 | 1703737 | 1611846 | c.1624G>A | p.E542K  | Substitution - Missense | 3:178936082-178936082 |
| 1703754 | 1703754 | 1611863 | c.1633G>A | p.E545K  | Substitution - Missense | 3:178936091-178936091 |
| 1703770 | 1703770 | 1611879 | c.1633G>A | p.E545K  | Substitution - Missense | 3:178936091-178936091 |
| 1703776 | 1703776 | 1611885 | c.1633G>C | p.E545Q  | Substitution - Missense | 3:178936091-178936091 |
| 1703777 | 1703777 | 1611886 | c.1490A>G | p.N497S  | Substitution - Missense | 3:178928304-178928304 |
| 1703778 | 1703778 | 1611887 | c.1636C>A | p.Q546K  | Substitution - Missense | 3:178936094-178936094 |
| 1703796 | 1703796 | 1611905 | c.3140A>G | p.H1047R | Substitution - Missense | 3:178952085-178952085 |
| 1703804 | 1703804 | 1611913 | c.3140A>G | p.H1047R | Substitution - Missense | 3:178952085-178952085 |
| 1703811 | 1703811 | 1611920 | c.3140A>G | p.H1047R | Substitution - Missense | 3:178952085-178952085 |
| 1703816 | 1703816 | 1611925 | c.3140A>G | p.H1047R | Substitution - Missense | 3:178952085-178952085 |
| 1703824 | 1703824 | 1611933 | c.3140A>G | p.H1047R | Substitution - Missense | 3:178952085-178952085 |
| 1703825 | 1703825 | 1611934 | c.3140A>G | p.H1047R | Substitution - Missense | 3:178952085-178952085 |



|         |         |         |           |          |                         |                       |
|---------|---------|---------|-----------|----------|-------------------------|-----------------------|
| 1703827 | 1703827 | 1611936 | c.3140A>G | p.H1047R | Substitution - Missense | 3:178952085-178952085 |
| 1703837 | 1703837 | 1611946 | c.3140A>G | p.H1047R | Substitution - Missense | 3:178952085-178952085 |
| 1703840 | 1703840 | 1611949 | c.3140A>G | p.H1047R | Substitution - Missense | 3:178952085-178952085 |
| 1703851 | 1703851 | 1611960 | c.3140A>G | p.H1047R | Substitution - Missense | 3:178952085-178952085 |
| 1703855 | 1703855 | 1611964 | c.3140A>G | p.H1047R | Substitution - Missense | 3:178952085-178952085 |
| 1703856 | 1703856 | 1611965 | c.3140A>G | p.H1047R | Substitution - Missense | 3:178952085-178952085 |
| 1709207 | 1709207 | 1617113 | c.?       | p.E545K  | Substitution - Missense |                       |
| 1709225 | 1709225 | 1617131 | c.?       | p.E545K  | Substitution - Missense |                       |
| 1720266 | 1720266 | 1627546 | c.?       | p.Q546K  | Substitution - Missense |                       |
| 1720329 | 1720329 | 1627609 | c.?       | p.H1047L | Substitution - Missense |                       |
| 1720331 | 1720331 | 1627611 | c.?       | p.H1047R | Substitution - Missense |                       |
| 1720335 | 1720335 | 1627615 | c.?       | p.H1047R | Substitution - Missense |                       |
| 1720340 | 1720340 | 1627620 | c.?       | p.E545K  | Substitution - Missense |                       |
| 1738895 | 1738895 | 1644726 | c.1624G>A | p.E542K  | Substitution - Missense | 3:178936082-178936082 |
| 1738900 | 1738900 | 1644731 | c.1633G>A | p.E545K  | Substitution - Missense | 3:178936091-178936091 |
| 1738903 | 1738903 | 1644734 | c.1634A>C | p.E545A  | Substitution - Missense | 3:178936092-178936092 |
| 1738909 | 1738909 | 1644740 | c.3140A>G | p.H1047R | Substitution - Missense | 3:178952085-178952085 |
| 1738911 | 1738911 | 1644742 | c.3140A>G | p.H1047R | Substitution - Missense | 3:178952085-178952085 |
| 1738918 | 1738918 | 1644749 | c.3140A>G | p.H1047R | Substitution - Missense | 3:178952085-178952085 |
| 1738925 | 1738925 | 1644756 | c.3073A>K | p.T1025? | Substitution - Missense | 3:178952018-178952018 |
| 1738927 | 1738927 | 1644758 | c.3073A>K | p.T1025? | Substitution - Missense | 3:178952018-178952018 |
| 1739271 | 1739271 | 1644993 | c.?       | p.H1047R | Substitution - Missense |                       |
| 1773308 | 1773308 | 1677548 | c.3140A>G | p.H1047R | Substitution - Missense | 3:178952085-178952085 |
| 1773309 | 1773309 | 1677549 | c.3140A>G | p.H1047R | Substitution - Missense | 3:178952085-178952085 |
| 1835026 | 1835026 | 1730058 | c.?       | p.H1047R | Substitution - Missense |                       |
| 1835037 | 1835037 | 1730069 | c.?       | p.H1047R | Substitution - Missense |                       |
| 1864108 | 1864108 | 1754962 | c.?       | p.E545A  | Substitution - Missense |                       |
| 1864129 | 1864129 | 1754980 | c.?       | p.H1047R | Substitution - Missense |                       |
| 1864130 | 1864130 | 1754981 | c.?       | p.E453K  | Substitution - Missense |                       |
| 1864130 | 1864130 | 1754981 | c.?       | p.H1047R | Substitution - Missense |                       |
| 1864131 | 1864131 | 1754982 | c.?       | p.H1047R | Substitution - Missense |                       |
| 1864131 | 1864131 | 1754982 | c.?       | p.E453K  | Substitution - Missense |                       |
| 1876815 | 1876815 | 1767377 | c.?       | p.Q546P  | Substitution - Missense |                       |
| 1876816 | 1876816 | 1767378 | c.?       | p.Q546P  | Substitution - Missense |                       |
| 1882656 | 1882656 | 1772776 | c.3140A>G | p.H1047R | Substitution - Missense | 3:178952085-178952085 |
| 1882726 | 1882726 | 1772846 | c.1633G>A | p.E545K  | Substitution - Missense | 3:178936091-178936091 |
| 1882729 | 1882729 | 1772849 | c.1624G>A | p.E542K  | Substitution - Missense | 3:178936082-178936082 |
| 1882748 | 1882748 | 1772868 | c.3140A>G | p.H1047R | Substitution - Missense | 3:178952085-178952085 |
| 1882752 | 1882752 | 1772872 | c.1624G>A | p.E542K  | Substitution - Missense | 3:178936082-178936082 |
| 1882755 | 1882755 | 1772875 | c.1624G>A | p.E542K  | Substitution - Missense | 3:178936082-178936082 |
| 1972144 | 1972144 | 1858393 | c.?       | p.E542K  | Substitution - Missense |                       |
| 1972155 | 1972155 | 1858404 | c.?       | p.E542K  | Substitution - Missense |                       |
| 1972157 | 1972157 | 1858406 | c.?       | p.E542K  | Substitution - Missense |                       |

|         |         |         |     |          |                         |
|---------|---------|---------|-----|----------|-------------------------|
| 1972165 | 1972165 | 1858414 | c.? | p.E542K  | Substitution - Missense |
| 1972166 | 1972166 | 1858415 | c.? | p.E542K  | Substitution - Missense |
| 1972174 | 1972174 | 1858423 | c.? | p.E542K  | Substitution - Missense |
| 1972175 | 1972175 | 1858424 | c.? | p.E542K  | Substitution - Missense |
| 1972177 | 1972177 | 1858426 | c.? | p.E542K  | Substitution - Missense |
| 1972178 | 1972178 | 1858427 | c.? | p.E542K  | Substitution - Missense |
| 1972182 | 1972182 | 1858431 | c.? | p.E542K  | Substitution - Missense |
| 1972186 | 1972186 | 1858435 | c.? | p.E542K  | Substitution - Missense |
| 1972188 | 1972188 | 1858437 | c.? | p.E542K  | Substitution - Missense |
| 1972191 | 1972191 | 1858440 | c.? | p.E542K  | Substitution - Missense |
| 1972192 | 1972192 | 1858441 | c.? | p.E542K  | Substitution - Missense |
| 1972196 | 1972196 | 1858445 | c.? | p.E545A  | Substitution - Missense |
| 1972197 | 1972197 | 1858446 | c.? | p.E545A  | Substitution - Missense |
| 1972199 | 1972199 | 1858448 | c.? | p.E545G  | Substitution - Missense |
| 1972200 | 1972200 | 1858449 | c.? | p.E545G  | Substitution - Missense |
| 1972201 | 1972201 | 1858450 | c.? | p.E545G  | Substitution - Missense |
| 1972208 | 1972208 | 1858457 | c.? | p.E545K  | Substitution - Missense |
| 1972210 | 1972210 | 1858459 | c.? | p.E545K  | Substitution - Missense |
| 1972214 | 1972214 | 1858463 | c.? | p.E545K  | Substitution - Missense |
| 1972226 | 1972226 | 1858475 | c.? | p.E545K  | Substitution - Missense |
| 1972232 | 1972232 | 1858481 | c.? | p.E545K  | Substitution - Missense |
| 1972235 | 1972235 | 1858484 | c.? | p.E545K  | Substitution - Missense |
| 1972242 | 1972242 | 1858491 | c.? | p.E545K  | Substitution - Missense |
| 1972251 | 1972251 | 1858500 | c.? | p.E545K  | Substitution - Missense |
| 1972254 | 1972254 | 1858503 | c.? | p.E545K  | Substitution - Missense |
| 1972269 | 1972269 | 1858518 | c.? | p.E545K  | Substitution - Missense |
| 1972273 | 1972273 | 1858522 | c.? | p.E545K  | Substitution - Missense |
| 1972285 | 1972285 | 1858534 | c.? | p.E545K  | Substitution - Missense |
| 1972287 | 1972287 | 1858536 | c.? | p.E545K  | Substitution - Missense |
| 1972298 | 1972298 | 1858547 | c.? | p.E545K  | Substitution - Missense |
| 1972306 | 1972306 | 1858555 | c.? | p.E545K  | Substitution - Missense |
| 1972309 | 1972309 | 1858558 | c.? | p.E545Q  | Substitution - Missense |
| 1972310 | 1972310 | 1858559 | c.? | p.H1047L | Substitution - Missense |
| 1972313 | 1972313 | 1858562 | c.? | p.H1047L | Substitution - Missense |
| 1972314 | 1972314 | 1858563 | c.? | p.H1047L | Substitution - Missense |
| 1972320 | 1972320 | 1858569 | c.? | p.H1047L | Substitution - Missense |
| 1972327 | 1972327 | 1858576 | c.? | p.H1047L | Substitution - Missense |
| 1972328 | 1972328 | 1858577 | c.? | p.H1047L | Substitution - Missense |
| 1972337 | 1972337 | 1858586 | c.? | p.H1047L | Substitution - Missense |
| 1972339 | 1972339 | 1858588 | c.? | p.H1047L | Substitution - Missense |
| 1972340 | 1972340 | 1858589 | c.? | p.H1047L | Substitution - Missense |
| 1972343 | 1972343 | 1858592 | c.? | p.H1047L | Substitution - Missense |
| 1972348 | 1972348 | 1858597 | c.? | p.H1047R | Substitution - Missense |

|         |         |         |           |          |                         |                       |
|---------|---------|---------|-----------|----------|-------------------------|-----------------------|
| 1972349 | 1972349 | 1858598 | c.?       | p.H1047R | Substitution - Missense |                       |
| 1972352 | 1972352 | 1858601 | c.?       | p.H1047R | Substitution - Missense |                       |
| 1972355 | 1972355 | 1858604 | c.?       | p.H1047R | Substitution - Missense |                       |
| 1972357 | 1972357 | 1858606 | c.?       | p.H1047R | Substitution - Missense |                       |
| 1972359 | 1972359 | 1858608 | c.?       | p.H1047R | Substitution - Missense |                       |
| 1972364 | 1972364 | 1858613 | c.?       | p.H1047R | Substitution - Missense |                       |
| 1972368 | 1972368 | 1858617 | c.?       | p.H1047R | Substitution - Missense |                       |
| 1972371 | 1972371 | 1858620 | c.?       | p.H1047R | Substitution - Missense |                       |
| 1972373 | 1972373 | 1858622 | c.?       | p.H1047R | Substitution - Missense |                       |
| 1972385 | 1972385 | 1858634 | c.?       | p.H1047R | Substitution - Missense |                       |
| 1972386 | 1972386 | 1858635 | c.?       | p.H1047R | Substitution - Missense |                       |
| 1972400 | 1972400 | 1858649 | c.?       | p.H1047R | Substitution - Missense |                       |
| 1972408 | 1972408 | 1858657 | c.?       | p.H1047R | Substitution - Missense |                       |
| 1972412 | 1972412 | 1858661 | c.?       | p.H1047R | Substitution - Missense |                       |
| 1972415 | 1972415 | 1858664 | c.?       | p.H1047R | Substitution - Missense |                       |
| 1972424 | 1972424 | 1858673 | c.?       | p.H1047R | Substitution - Missense |                       |
| 1972426 | 1972426 | 1858675 | c.?       | p.H1047R | Substitution - Missense |                       |
| 1972430 | 1972430 | 1858679 | c.?       | p.H1047R | Substitution - Missense |                       |
| 1972431 | 1972431 | 1858680 | c.?       | p.H1047R | Substitution - Missense |                       |
| 1972433 | 1972433 | 1858682 | c.?       | p.H1047R | Substitution - Missense |                       |
| 1972442 | 1972442 | 1858691 | c.?       | p.H1047R | Substitution - Missense |                       |
| 1972445 | 1972445 | 1858694 | c.?       | p.H1047R | Substitution - Missense |                       |
| 1972458 | 1972458 | 1858707 | c.?       | p.H1047R | Substitution - Missense |                       |
| 1972460 | 1972460 | 1858709 | c.?       | p.H1047R | Substitution - Missense |                       |
| 1972464 | 1972464 | 1858713 | c.?       | p.H1047R | Substitution - Missense |                       |
| 1972473 | 1972473 | 1858722 | c.?       | p.H1047R | Substitution - Missense |                       |
| 1972484 | 1972484 | 1858733 | c.?       | p.H1047R | Substitution - Missense |                       |
| 1972486 | 1972486 | 1858735 | c.?       | p.H1047R | Substitution - Missense |                       |
| 1972494 | 1972494 | 1858743 | c.?       | p.H1047R | Substitution - Missense |                       |
| 1972495 | 1972495 | 1858744 | c.?       | p.H1047R | Substitution - Missense |                       |
| 1972499 | 1972499 | 1858748 | c.?       | p.H1047R | Substitution - Missense |                       |
| 1972506 | 1972506 | 1858755 | c.?       | p.H1047R | Substitution - Missense |                       |
| 1972536 | 1972536 | 1858785 | c.?       | p.H1047R | Substitution - Missense |                       |
| 1972537 | 1972537 | 1858786 | c.?       | p.H1047R | Substitution - Missense |                       |
| 1972540 | 1972540 | 1858789 | c.?       | p.H1047R | Substitution - Missense |                       |
| 1972545 | 1972545 | 1858794 | c.?       | p.H1047R | Substitution - Missense |                       |
| 1972546 | 1972546 | 1858795 | c.?       | p.H1047R | Substitution - Missense |                       |
| 1972552 | 1972552 | 1858801 | c.?       | p.H1047R | Substitution - Missense |                       |
| 1972560 | 1972560 | 1858809 | c.?       | p.H1047R | Substitution - Missense |                       |
| 2042629 | 2042629 | 1923747 | c.1633G>A | p.E545K  | Substitution - Missense | 3:178936091-178936091 |
| 2042634 | 2042634 | 1923752 | c.3140A>G | p.H1047R | Substitution - Missense | 3:178952085-178952085 |
| 2042643 | 2042643 | 1923761 | c.3140A>G | p.H1047R | Substitution - Missense | 3:178952085-178952085 |
| 2042646 | 2042646 | 1923764 | c.3104C>T | p.A1035V | Substitution - Missense | 3:178952049-178952049 |

|               |         |         |           |          |                              |                       |
|---------------|---------|---------|-----------|----------|------------------------------|-----------------------|
| 2042649       | 2042649 | 1923767 | c.3132T>G | p.N1044K | Substitution - Missense      | 3:178952077-178952077 |
| 2042680       | 2042680 | 1923798 | c.3140A>G | p.H1047R | Substitution - Missense      | 3:178952085-178952085 |
| 2042879       | 2042879 | 1923988 | c.1612G>T | p.D538Y  | Substitution - Missense      | 3:178936070-178936070 |
| 2067942       | 2067942 | 1947735 | c.?       | p.H1047R | Substitution - Missense      |                       |
| 2107718       | 2107718 | 1985579 | c.3140A>G | p.H1047R | Substitution - Missense      | 3:178952085-178952085 |
| 2107722       | 2107722 | 1985583 | c.1633G>A | p.E545K  | Substitution - Missense      | 3:178936091-178936091 |
| 2107723       | 2107723 | 1985584 | c.1624G>A | p.E542K  | Substitution - Missense      | 3:178936082-178936082 |
| 2131988       | 2131988 | 2006051 | c.?       | p.E545K  | Substitution - Missense      |                       |
| 2131989       | 2131989 | 2006052 | c.?       | p.E545K  | Substitution - Missense      |                       |
| 2131991       | 2131991 | 2006054 | c.?       | p.H1047R | Substitution - Missense      |                       |
| HCC1500       | 1018471 | 935629  | c.3075C>T | p.T1025T | Substitution - coding silent | 3:178952020-178952020 |
| HCC1954       | 2165007 | 2033419 | c.?       | p.H1047R | Substitution - Missense      |                       |
| PD3983a       | 1280802 | 1192095 | c.3140A>G | p.H1047R | Substitution - Missense      | 3:178952085-178952085 |
| PD3994a       | 1280826 | 1192117 | c.1035T>A | p.N345K  | Substitution - Missense      | 3:178921553-178921553 |
| PD4076a       | 1304487 | 1215535 | c.3140A>G | p.H1047R | Substitution - Missense      | 3:178952085-178952085 |
| PD4124a       | 1331075 | 1241549 | c.3140A>T | p.H1047L | Substitution - Missense      | 3:178952085-178952085 |
| PD4126a       | 1331079 | 1241553 | c.3127A>G | p.M1043V | Substitution - Missense      | 3:178952072-178952072 |
| PD4137a       | 1331107 | 1241581 | c.1624G>A | p.E542K  | Substitution - Missense      | 3:178936082-178936082 |
| SK-BR-5       | 1289406 | 1200681 | c.3140A>G | p.H1047R | Substitution - Missense      | 3:178952085-178952085 |
| SUM-159       | 904389  | 821934  | c.3140A>T | p.H1047L | Substitution - Missense      | 3:178952085-178952085 |
| UACC893       | 1017162 | 934332  | c.3140A>G | p.H1047R | Substitution - Missense      | 3:178952085-178952085 |
| UACC893       | 1018469 | 935627  | c.3140A>G | p.H1047R | Substitution - Missense      | 3:178952085-178952085 |
| EFM-192A      | 2165004 | 2033416 | c.?       | p.C420R  | Substitution - Missense      |                       |
| HF-11386      | 1507764 | 1430630 | c.3140A>G | p.H1047R | Substitution - Missense      | 3:178952085-178952085 |
| SUM185PE      | 1046940 | 963171  | c.3140A>G | p.H1047R | Substitution - Missense      | 3:178952085-178952085 |
| SUM185PE      | 1289413 | 1200688 | c.3140A>G | p.H1047R | Substitution - Missense      | 3:178952085-178952085 |
| UACC-812      | 1136361 | 1048925 | c.1035T>A | p.N345K  | Substitution - Missense      | 3:178921553-178921553 |
| UACC-893      | 1046943 | 963174  | c.3140A>G | p.H1047R | Substitution - Missense      | 3:178952085-178952085 |
| Sample_II     | 2053349 | 1933595 | c.?       | p.H1047R | Substitution - Missense      |                       |
| HF-17392-(1)  | 1507759 | 1430625 | c.3140A>T | p.H1047L | Substitution - Missense      | 3:178952085-178952085 |
| CGA-A2-A04P-0 | 1899600 | 1788284 | c.263G>A  | p.R88Q   | Substitution - Missense      | 3:178916876-178916876 |
| CGA-A2-A0CP-0 | 1899608 | 1788292 | c.3140A>G | p.H1047R | Substitution - Missense      | 3:178952085-178952085 |
| CGA-A2-A0CP-0 | 1899608 | 1788292 | c.2176G>A | p.E726K  | Substitution - Missense      | 3:178938934-178938934 |
| CGA-A2-A0EX-0 | 1899625 | 1788309 | c.1633G>A | p.E545K  | Substitution - Missense      | 3:178936091-178936091 |
| CGA-A2-A0YI-0 | 1899636 | 1788320 | c.1035T>A | p.N345K  | Substitution - Missense      | 3:178921553-178921553 |
| CGA-A2-A0YL-0 | 1779320 | 1683319 | c.3140A>G | p.H1047R | Substitution - Missense      | 3:178952085-178952085 |
| CGA-A7-A0CH-0 | 1899655 | 1788339 | c.1633G>A | p.E545K  | Substitution - Missense      | 3:178936091-178936091 |
| CGA-A7-A3J1-0 | 2187866 | 2056144 | c.1035T>A | p.N345K  | Substitution - Missense      | 3:178921553-178921553 |
| CGA-A7-A425-0 | 2187864 | 2056142 | c.3140A>G | p.H1047R | Substitution - Missense      | 3:178952085-178952085 |
| CGA-A8-A06U-0 | 1779338 | 1683337 | c.3140A>G | p.H1047R | Substitution - Missense      | 3:178952085-178952085 |
| CGA-A8-A08L-0 | 1899704 | 1788388 | c.3140A>G | p.H1047R | Substitution - Missense      | 3:178952085-178952085 |
| CGA-A8-A09D-0 | 1899721 | 1788405 | c.3140A>G | p.H1047R | Substitution - Missense      | 3:178952085-178952085 |
| CGA-A8-A0A9-0 | 1899737 | 1788421 | c.3140A>G | p.H1047R | Substitution - Missense      | 3:178952085-178952085 |

|               |         |         |                 |                    |                              |                       |
|---------------|---------|---------|-----------------|--------------------|------------------------------|-----------------------|
| CGA-AC-A23E-0 | 1899741 | 1788425 | c.3140A>G       | p.H1047R           | Substitution - Missense      | 3:178952085-178952085 |
| CGA-AC-A2QI-0 | 2187837 | 2056115 | c.3127A>G       | p.M1043V           | Substitution - Missense      | 3:178952072-178952072 |
| CGA-AC-A3OD-C | 2187833 | 2056111 | c.1633G>A       | p.E545K            | Substitution - Missense      | 3:178936091-178936091 |
| CGA-AC-A3W6-C | 2187829 | 2056107 | c.353G>A        | p.G118D            | Substitution - Missense      | 3:178917478-178917478 |
| CGA-AC-A3YJ-0 | 2187827 | 2056105 | c.3140A>G       | p.H1047R           | Substitution - Missense      | 3:178952085-178952085 |
| CGA-AN-A04C-0 | 1899746 | 1788430 | c.1886C>G       | p.S629C            | Substitution - Missense      | 3:178937498-178937498 |
| CGA-AN-A0AK-0 | 2187823 | 2056101 | c.1633G>A       | p.E545K            | Substitution - Missense      | 3:178936091-178936091 |
| CGA-AN-A0FF-0 | 1899754 | 1788438 | c.3140A>G       | p.H1047R           | Substitution - Missense      | 3:178952085-178952085 |
| CGA-AN-A0XL-0 | 1899764 | 1788448 | c.3140A>G       | p.H1047R           | Substitution - Missense      | 3:178952085-178952085 |
| CGA-AQ-A54O-C | 2187817 | 2056095 | c.1633G>A       | p.E545K            | Substitution - Missense      | 3:178936091-178936091 |
| CGA-AR-A1AV-0 | 1899828 | 1788512 | c.3140A>G       | p.H1047R           | Substitution - Missense      | 3:178952085-178952085 |
| CGA-AR-A5QP-C | 2187804 | 2056082 | c.1633G>A       | p.E545K            | Substitution - Missense      | 3:178936091-178936091 |
| CGA-B6-A0IP-0 | 1899858 | 1788542 | c.3140A>G       | p.H1047R           | Substitution - Missense      | 3:178952085-178952085 |
| CGA-B6-A0IP-0 | 1899858 | 1788542 | c.263G>A        | p.R88Q             | Substitution - Missense      | 3:178916876-178916876 |
| CGA-BH-A0B5-0 | 1899887 | 1788571 | c.331_333delAAG | p.K111delK         | Deletion - In frame          | 3:178916944-178916946 |
| CGA-BH-A0BA-0 | 1899891 | 1788575 | c.3140A>G       | p.H1047R           | Substitution - Missense      | 3:178952085-178952085 |
| CGA-BH-A0BJ-0 | 1899894 | 1788578 | c.1035T>A       | p.N345K            | Substitution - Missense      | 3:178921553-178921553 |
| CGA-BH-A0DO-C | 1899915 | 1788599 | c.3129G>A       | p.M1043I           | Substitution - Missense      | 3:178952074-178952074 |
| CGA-BH-A0DX-C | 1899920 | 1788604 | c.1633G>A       | p.E545K            | Substitution - Missense      | 3:178936091-178936091 |
| CGA-BH-A0GY-C | 1899931 | 1788615 | c.3140A>G       | p.H1047R           | Substitution - Missense      | 3:178952085-178952085 |
| CGA-BH-A0W7-C | 1899947 | 1788631 | c.2176G>A       | p.E726K            | Substitution - Missense      | 3:178938934-178938934 |
| CGA-BH-A0W7-C | 1899947 | 1788631 | c.3140A>G       | p.H1047R           | Substitution - Missense      | 3:178952085-178952085 |
| CGA-BH-A18M-C | 1899954 | 1788638 | c.3140A>G       | p.H1047R           | Substitution - Missense      | 3:178952085-178952085 |
| CGA-BH-A1ET-0 | 1899966 | 1788650 | c.1624G>A       | p.E542K            | Substitution - Missense      | 3:178936082-178936082 |
| CGA-C8-A12N-0 | 1899999 | 1788683 | c.1633G>A       | p.E545K            | Substitution - Missense      | 3:178936091-178936091 |
| CGA-C8-A12U-0 | 1900004 | 1788688 | c.3140A>G       | p.H1047R           | Substitution - Missense      | 3:178952085-178952085 |
| CGA-C8-A12Y-0 | 1900008 | 1788692 | c.3140A>G       | p.H1047R           | Substitution - Missense      | 3:178952085-178952085 |
| CGA-C8-A1HE-0 | 1900018 | 1788702 | c.3140A>G       | p.H1047R           | Substitution - Missense      | 3:178952085-178952085 |
| CGA-D8-A143-0 | 1900043 | 1788727 | c.3140A>G       | p.H1047R           | Substitution - Missense      | 3:178952085-178952085 |
| CGA-D8-A146-0 | 1900045 | 1788729 | c.1633G>A       | p.E545K            | Substitution - Missense      | 3:178936091-178936091 |
| CGA-D8-A1J8-0 | 2187786 | 2056064 | c.1633G>A       | p.E545K            | Substitution - Missense      | 3:178936091-178936091 |
| CGA-D8-A1JE-0 | 1900051 | 1788735 | c.3140A>G       | p.H1047R           | Substitution - Missense      | 3:178952085-178952085 |
| CGA-D8-A1XB-0 | 1900071 | 1788755 | c.313_324del12  | p.V105_R108delVGNR | Deletion - In frame          | 3:178916926-178916937 |
| CGA-D8-A1XL-0 | 1900076 | 1788760 | c.1258T>C       | p.C420R            | Substitution - Missense      | 3:178927980-178927980 |
| CGA-D8-A1XS-0 | 1900080 | 1788764 | c.1633G>A       | p.E545K            | Substitution - Missense      | 3:178936091-178936091 |
| CGA-D8-A1Y2-0 | 1900089 | 1788773 | c.1633G>A       | p.E545K            | Substitution - Missense      | 3:178936091-178936091 |
| CGA-D8-A27P-0 | 1900099 | 1788783 | c.3140A>G       | p.H1047R           | Substitution - Missense      | 3:178952085-178952085 |
| CGA-D8-A27T-0 | 1900101 | 1788785 | c.1633G>A       | p.E545K            | Substitution - Missense      | 3:178936091-178936091 |
| CGA-D8-A3Z6-0 | 2187778 | 2056056 | c.3140A>G       | p.H1047R           | Substitution - Missense      | 3:178952085-178952085 |
| CGA-E2-A10B-0 | 1900108 | 1788792 | c.3140A>G       | p.H1047R           | Substitution - Missense      | 3:178952085-178952085 |
| CGA-E2-A10F-0 | 1900111 | 1788795 | c.3140A>G       | p.H1047R           | Substitution - Missense      | 3:178952085-178952085 |
| CGA-E2-A10F-0 | 1900111 | 1788795 | c.2176G>A       | p.E726K            | Substitution - Missense      | 3:178938934-178938934 |
| CGA-E2-A152-0 | 1900125 | 1788809 | c.2292C>T       | p.L764L            | Substitution - coding silent | 3:178941973-178941973 |

|               |         |         |           |          |                         |                       |
|---------------|---------|---------|-----------|----------|-------------------------|-----------------------|
| CGA-E2-A15G-0 | 1900139 | 1788823 | c.3140A>G | p.H1047R | Substitution - Missense | 3:178952085-178952085 |
| CGA-E2-A15K-0 | 1900144 | 1788828 | c.3140A>G | p.H1047R | Substitution - Missense | 3:178952085-178952085 |
| CGA-E2-A15L-0 | 1900145 | 1788829 | c.3140A>G | p.H1047R | Substitution - Missense | 3:178952085-178952085 |
| CGA-E2-A1BC-0 | 1900158 | 1788842 | c.3140A>G | p.H1047R | Substitution - Missense | 3:178952085-178952085 |
| CGA-E2-A11F-0 | 1900161 | 1788845 | c.3140A>G | p.H1047R | Substitution - Missense | 3:178952085-178952085 |
| CGA-E2-A2P5-0 | 2187772 | 2056050 | c.2740G>C | p.G914R  | Substitution - Missense | 3:178947865-178947865 |
| CGA-E2-A2P5-0 | 2187772 | 2056050 | c.1035T>A | p.N345K  | Substitution - Missense | 3:178921553-178921553 |
| CGA-E9-A1NI-0 | 1900195 | 1788879 | c.1624G>A | p.E542K  | Substitution - Missense | 3:178936082-178936082 |
| CGA-E9-A1RI-0 | 1900212 | 1788896 | c.3140A>T | p.H1047L | Substitution - Missense | 3:178952085-178952085 |
| CGA-LL-A50Y-0 | 2187711 | 2055989 | c.3140A>G | p.H1047R | Substitution - Missense | 3:178952085-178952085 |
| CGA-LQ-A4E4-0 | 2187708 | 2055986 | c.3140A>G | p.H1047R | Substitution - Missense | 3:178952085-178952085 |
| CGA-LQ-A4E4-0 | 2187708 | 2055986 | c.1625A>G | p.E542G  | Substitution - Missense | 3:178936083-178936083 |
| CGA-MS-A51U-0 | 2187707 | 2055985 | c.1035T>A | p.N345K  | Substitution - Missense | 3:178921553-178921553 |
| CGA-OK-A5Q2-0 | 2187706 | 2055984 | c.3140A>G | p.H1047R | Substitution - Missense | 3:178952085-178952085 |
| CGA-OL-A5S0-0 | 2187695 | 2055973 | c.1624G>A | p.E542K  | Substitution - Missense | 3:178936082-178936082 |
| CGA-A1-A0SI-0 | 1899594 | 1788278 | c.3140A>G | p.H1047R | Substitution - Missense | 3:178952085-178952085 |
| CGA-A1-A0SI-0 | 1899594 | 1788278 | c.2176G>A | p.E726K  | Substitution - Missense | 3:178938934-178938934 |
| CGA-E9-A1RA-0 | 1900204 | 1788888 | c.1624G>A | p.E542K  | Substitution - Missense | 3:178936082-178936082 |
| CGA-A7-A4SF-0 | 2187857 | 2056135 | c.1624G>A | p.E542K  | Substitution - Missense | 3:178936082-178936082 |
| CGA-D8-A27G-0 | 2187781 | 2056059 | c.3140A>G | p.H1047R | Substitution - Missense | 3:178952085-178952085 |
| 1670310       | 1670310 | 1583596 | c.3140A>G | p.H1047R | Substitution - Missense | 3:178952085-178952085 |
| 1972501       | 1972501 | 1858750 | c.?       | p.H1047R | Substitution - Missense |                       |
| 1193512       | 1193512 | 1105408 | c.?       | p.H1047R | Substitution - Missense |                       |
| MCF-7         | 1436031 | 1345310 | c.?       | p.E545K  | Substitution - Missense |                       |
| 1972395       | 1972395 | 1858644 | c.?       | p.H1047R | Substitution - Missense |                       |
| 1301928       | 1301928 | 1212979 | c.1624G>A | p.E542K  | Substitution - Missense | 3:178936082-178936082 |
| MCF7          | 947352  | 863756  | c.1633G>A | p.E545K  | Substitution - Missense | 3:178936091-178936091 |
| 1972351       | 1972351 | 1858600 | c.?       | p.H1047R | Substitution - Missense |                       |
| 1244798       | 1244798 | 1156504 | c.1624G>A | p.E542K  | Substitution - Missense | 3:178936082-178936082 |
| 1321134       | 1321134 | 1232021 | c.3140A>G | p.H1047R | Substitution - Missense | 3:178952085-178952085 |
| 1703762       | 1703762 | 1611871 | c.1633G>A | p.E545K  | Substitution - Missense | 3:178936091-178936091 |
| 1530110       | 1530110 | 1452482 | c.1633G>A | p.E545K  | Substitution - Missense | 3:178936091-178936091 |
| 1692227       | 1692227 | 1600492 | c.?       | p.E542K  | Substitution - Missense |                       |
| 904417        | 904417  | 821962  | c.1624G>A | p.E542K  | Substitution - Missense | 3:178936082-178936082 |
| 1212760       | 1212760 | 1124627 | c.3140A>T | p.H1047L | Substitution - Missense | 3:178952085-178952085 |
| 1670311       | 1670311 | 1583597 | c.3140A>G | p.H1047R | Substitution - Missense | 3:178952085-178952085 |
| HCC202        | 904358  | 821903  | c.1633G>A | p.E545K  | Substitution - Missense | 3:178936091-178936091 |
| 1657037       | 1657037 | 1571692 | c.3140A>G | p.H1047R | Substitution - Missense | 3:178952085-178952085 |
| 1709212       | 1709212 | 1617118 | c.?       | p.H1047R | Substitution - Missense |                       |
| 2067909       | 2067909 | 1947702 | c.?       | p.E545K  | Substitution - Missense |                       |
| 1972293       | 1972293 | 1858542 | c.?       | p.E545K  | Substitution - Missense |                       |
| 1329569       | 1329569 | 1240054 | c.1624G>A | p.E542K  | Substitution - Missense | 3:178936082-178936082 |
| 1135808       | 1135808 | 1048372 | c.3140A>G | p.H1047R | Substitution - Missense | 3:178952085-178952085 |

|               |         |         |           |          |                         |                       |
|---------------|---------|---------|-----------|----------|-------------------------|-----------------------|
| 1972370       | 1972370 | 1858619 | c.?       | p.H1047R | Substitution - Missense |                       |
| 1443749       | 1443749 | 1367994 | c.?       | p.H1047R | Substitution - Missense |                       |
| 1135894       | 1135894 | 1048458 | c.1633G>A | p.E545K  | Substitution - Missense | 3:178936091-178936091 |
| 1193535       | 1193535 | 1105431 | c.?       | p.H1047R | Substitution - Missense |                       |
| 1972162       | 1972162 | 1858411 | c.?       | p.E542K  | Substitution - Missense |                       |
| 1244789       | 1244789 | 1156495 | c.1624G>A | p.E542K  | Substitution - Missense | 3:178936082-178936082 |
| 1244909       | 1244909 | 1156615 | c.3140A>G | p.H1047R | Substitution - Missense | 3:178952085-178952085 |
| 1972316       | 1972316 | 1858565 | c.?       | p.H1047L | Substitution - Missense |                       |
| 1329610       | 1329610 | 1240095 | c.3140A>G | p.H1047R | Substitution - Missense | 3:178952085-178952085 |
| 1972234       | 1972234 | 1858483 | c.?       | p.E545K  | Substitution - Missense |                       |
| 1698859       | 1698859 | 1606977 | c.3140A>G | p.H1047R | Substitution - Missense | 3:178952085-178952085 |
| 1134431       | 1134431 | 1047091 | c.1633G>A | p.E545K  | Substitution - Missense | 3:178936091-178936091 |
| 1134428       | 1134428 | 1047088 | c.1633G>A | p.E545K  | Substitution - Missense | 3:178936091-178936091 |
| 1193552       | 1193552 | 1105448 | c.?       | p.E545K  | Substitution - Missense |                       |
| 1972468       | 1972468 | 1858717 | c.?       | p.H1047R | Substitution - Missense |                       |
| CGA-A8-A096-0 | 1779385 | 1683384 | c.3140A>G | p.H1047R | Substitution - Missense | 3:178952085-178952085 |
| 1676198       | 1676198 | 1588970 | c.?       | p.H1047R | Substitution - Missense |                       |
| 1329745       | 1329745 | 1240230 | c.3140A>G | p.H1047R | Substitution - Missense | 3:178952085-178952085 |
| CGA-AO-A03L-0 | 1899769 | 1788453 | c.1035T>A | p.N345K  | Substitution - Missense | 3:178921553-178921553 |
| 1972507       | 1972507 | 1858756 | c.?       | p.H1047R | Substitution - Missense |                       |
| 1675748       | 1675748 | 1588620 | c.3140A>G | p.H1047R | Substitution - Missense | 3:178952085-178952085 |
| 1675736       | 1675736 | 1588614 | c.1633G>A | p.E545K  | Substitution - Missense | 3:178936091-178936091 |
| CGA-BH-A0DV-0 | 1899919 | 1788603 | c.1633G>A | p.E545K  | Substitution - Missense | 3:178936091-178936091 |
| 904425        | 904425  | 821970  | c.1633G>A | p.E545K  | Substitution - Missense | 3:178936091-178936091 |
| 1321155       | 1321155 | 1232042 | c.3140A>T | p.H1047L | Substitution - Missense | 3:178952085-178952085 |
| 107049        | 1520439 | 1442814 | c.3140A>G | p.H1047R | Substitution - Missense | 3:178952085-178952085 |
| 1738921       | 1738921 | 1644752 | c.3073A>K | p.T1025? | Substitution - Missense | 3:178952018-178952018 |
| 1329585       | 1329585 | 1240070 | c.3140A>G | p.H1047R | Substitution - Missense | 3:178952085-178952085 |
| 1017178       | 1017178 | 934348  | c.1633G>A | p.E545K  | Substitution - Missense | 3:178936091-178936091 |
| CAL-148       | 2164985 | 2033397 | c.?       | p.H1047R | Substitution - Missense |                       |
| 1720337       | 1720337 | 1627617 | c.?       | p.Q546K  | Substitution - Missense |                       |
| E40060        | 894112  | 811880  | c.1633G>A | p.E545K  | Substitution - Missense | 3:178936091-178936091 |
| 901510        | 901510  | 819122  | c.3140A>G | p.H1047R | Substitution - Missense | 3:178952085-178952085 |
| 1419229       | 1419229 | 1329270 | c.3140A>G | p.H1047R | Substitution - Missense | 3:178952085-178952085 |
| 1972243       | 1972243 | 1858492 | c.?       | p.E545K  | Substitution - Missense |                       |
| 1244863       | 1244863 | 1156569 | c.3140A>T | p.H1047L | Substitution - Missense | 3:178952085-178952085 |
| 1244917       | 1244917 | 1156623 | c.3140A>G | p.H1047R | Substitution - Missense | 3:178952085-178952085 |
| 1670203       | 1670203 | 1583489 | c.3140A>G | p.H1047R | Substitution - Missense | 3:178952085-178952085 |
| 1329910       | 1329910 | 1240395 | c.1624G>A | p.E542K  | Substitution - Missense | 3:178936082-178936082 |
| 1244774       | 1244774 | 1156480 | c.1035T>A | p.N345K  | Substitution - Missense | 3:178921553-178921553 |
| 1738898       | 1738898 | 1644729 | c.1633G>A | p.E545K  | Substitution - Missense | 3:178936091-178936091 |
| 1297151       | 1297151 | 1208205 | c.?       | p.H1047R | Substitution - Missense |                       |
| CGA-E9-A1R0-0 | 1900197 | 1788881 | c.1633G>A | p.E545K  | Substitution - Missense | 3:178936091-178936091 |

|                |         |         |                  |                       |                         |                       |
|----------------|---------|---------|------------------|-----------------------|-------------------------|-----------------------|
| TCGA-E9-A295-0 | 1900230 | 1788914 | c.3140A>T        | p.H1047L              | Substitution - Missense | 3:178952085-178952085 |
|                | 1244765 | 1156471 | c.1035T>A        | p.N345K               | Substitution - Missense | 3:178921553-178921553 |
|                | 1676226 | 1588998 | c.?              | p.H1047R              | Substitution - Missense |                       |
|                | 1703850 | 1611959 | c.3140A>G        | p.H1047R              | Substitution - Missense | 3:178952085-178952085 |
|                | 1244886 | 1156592 | c.3140A>G        | p.H1047R              | Substitution - Missense | 3:178952085-178952085 |
|                | 1018918 | 935941  | c.1633G>A        | p.E545K               | Substitution - Missense | 3:178936091-178936091 |
|                | 1443901 | 1368146 | c.?              | p.H1047R              | Substitution - Missense |                       |
|                | 1972553 | 1858802 | c.?              | p.H1047R              | Substitution - Missense |                       |
|                | 1972168 | 1858417 | c.?              | p.E542K               | Substitution - Missense |                       |
|                | 1675755 | 1588624 | c.3140A>G        | p.H1047R              | Substitution - Missense | 3:178952085-178952085 |
|                | 1972190 | 1858439 | c.?              | p.E542K               | Substitution - Missense |                       |
|                | 1244842 | 1156548 | c.1634A>C        | p.E545A               | Substitution - Missense | 3:178936092-178936092 |
|                | 1738904 | 1644735 | c.1634A>C        | p.E545A               | Substitution - Missense | 3:178936092-178936092 |
| TCGA-A8-A09B-0 | 1899719 | 1788403 | c.1338_1364del27 | p447_L455delIPVPHGLEI | Deletion - In frame     | 3:178928060-178928086 |
|                | 1864115 | 1754968 | c.?              | p.H1047R              | Substitution - Missense |                       |
|                | 901507  | 819119  | c.3140A>G        | p.H1047R              | Substitution - Missense | 3:178952085-178952085 |
|                | 901509  | 819121  | c.3140A>G        | p.H1047R              | Substitution - Missense | 3:178952085-178952085 |
|                | 1244927 | 1156633 | c.3140A>G        | p.H1047R              | Substitution - Missense | 3:178952085-178952085 |
| TCGA-E9-A1R5-0 | 1900201 | 1788885 | c.1258T>C        | p.C420R               | Substitution - Missense | 3:178927980-178927980 |
|                | 1691782 | 1600048 | c.?              | p.E545K               | Substitution - Missense |                       |
|                | 1297105 | 1208159 | c.?              | p.H1047R              | Substitution - Missense |                       |
|                | 1122688 | 1035732 | c.3140A>G        | p.H1047R              | Substitution - Missense | 3:178952085-178952085 |
|                | 1193567 | 1105463 | c.?              | p.E545K               | Substitution - Missense |                       |
|                | 1876814 | 1767376 | c.?              | p.H1047R              | Substitution - Missense |                       |
|                | 1329898 | 1240383 | c.3140A>G        | p.H1047R              | Substitution - Missense | 3:178952085-178952085 |
|                | 1698884 | 1607002 | c.3140A>G        | p.H1047R              | Substitution - Missense | 3:178952085-178952085 |
|                | 1321115 | 1232002 | c.1624G>A        | p.E542K               | Substitution - Missense | 3:178936082-178936082 |
|                | 1709210 | 1617116 | c.?              | p.H1047R              | Substitution - Missense |                       |
|                | 904415  | 821960  | c.1624G>A        | p.E542K               | Substitution - Missense | 3:178936082-178936082 |
|                | 1972520 | 1858769 | c.?              | p.H1047R              | Substitution - Missense |                       |
|                | 1698851 | 1606969 | c.?              | p.E545K               | Substitution - Missense |                       |
|                | 1972264 | 1858513 | c.?              | p.E545K               | Substitution - Missense |                       |
|                | 901519  | 819131  | c.3140A>G        | p.H1047R              | Substitution - Missense | 3:178952085-178952085 |
|                | 1698518 | 1606636 | c.1634A>C        | p.E545A               | Substitution - Missense | 3:178936092-178936092 |
|                | 901523  | 819135  | c.3140A>G        | p.H1047R              | Substitution - Missense | 3:178952085-178952085 |
|                | 1018398 | 935556  | c.3140A>G        | p.H1047R              | Substitution - Missense | 3:178952085-178952085 |
| HF-11356       | 1507775 | 1430641 | c.3140A>G        | p.H1047R              | Substitution - Missense | 3:178952085-178952085 |
|                | 1691788 | 1600054 | c.?              | p.H1047R              | Substitution - Missense |                       |
|                | 2107716 | 1985577 | c.3140A>G        | p.H1047R              | Substitution - Missense | 3:178952085-178952085 |
|                | 1297125 | 1208179 | c.?              | p.H1047R              | Substitution - Missense |                       |
|                | 1244924 | 1156630 | c.3140A>G        | p.H1047R              | Substitution - Missense | 3:178952085-178952085 |
|                | 1193391 | 1105287 | c.3171G>A        | p.W1057*              | Substitution - Nonsense | 3:178952116-178952116 |
|                | 1193502 | 1105398 | c.?              | p.H1047R              | Substitution - Missense |                       |



|                |         |         |           |          |                         |                       |
|----------------|---------|---------|-----------|----------|-------------------------|-----------------------|
| 1972529        | 1972529 | 1858778 | c.?       | p.H1047R | Substitution - Missense |                       |
| 1329568        | 1329568 | 1240053 | c.1624G>A | p.E542K  | Substitution - Missense | 3:178936082-178936082 |
| 1698835        | 1698835 | 1606953 | c.?       | p.E542K  | Substitution - Missense |                       |
| 1972248        | 1972248 | 1858497 | c.?       | p.E545K  | Substitution - Missense |                       |
| 2148914        | 2148914 | 2018044 | c.?       | p.K111E  | Substitution - Missense |                       |
| 1972181        | 1972181 | 1858430 | c.?       | p.E542K  | Substitution - Missense |                       |
| 1703787        | 1703787 | 1611896 | c.3140A>T | p.H1047L | Substitution - Missense | 3:178952085-178952085 |
| 1972160        | 1972160 | 1858409 | c.?       | p.E542K  | Substitution - Missense |                       |
| 1124171        | 1124171 | 1037214 | c.3140A>T | p.H1047L | Substitution - Missense | 3:178952085-178952085 |
| 1297126        | 1297126 | 1208180 | c.?       | p.H1047R | Substitution - Missense |                       |
| 1972401        | 1972401 | 1858650 | c.?       | p.H1047R | Substitution - Missense |                       |
| 1972372        | 1972372 | 1858621 | c.?       | p.H1047R | Substitution - Missense |                       |
| 1972344        | 1972344 | 1858593 | c.?       | p.H1047L | Substitution - Missense |                       |
| 1703759        | 1703759 | 1611868 | c.1633G>A | p.E545K  | Substitution - Missense | 3:178936091-178936091 |
| 1972538        | 1972538 | 1858787 | c.?       | p.H1047R | Substitution - Missense |                       |
| SUM-102        | 904388  | 821933  | c.3140A>G | p.H1047R | Substitution - Missense | 3:178952085-178952085 |
| 1329825        | 1329825 | 1240310 | c.3140A>G | p.H1047R | Substitution - Missense | 3:178952085-178952085 |
| TCGA-E2-A153-0 | 1900126 | 1788810 | c.1633G>A | p.E545K  | Substitution - Missense | 3:178936091-178936091 |
| 1321118        | 1321118 | 1232005 | c.1633G>A | p.E545K  | Substitution - Missense | 3:178936091-178936091 |
| 1244848        | 1244848 | 1156554 | c.1637A>G | p.Q546R  | Substitution - Missense | 3:178936095-178936095 |
| 2053341        | 2053341 | 1933589 | c.3140A>G | p.H1047R | Substitution - Missense | 3:178952085-178952085 |
| 1670324        | 1670324 | 1583610 | c.3140A>G | p.H1047R | Substitution - Missense | 3:178952085-178952085 |
| TCGA-A2-A04N-0 | 1899599 | 1788283 | c.1624G>A | p.E542K  | Substitution - Missense | 3:178936082-178936082 |
| BB12T          | 1430363 | 1339777 | c.1624G>A | p.E542K  | Substitution - Missense | 3:178936082-178936082 |
| 1134438        | 1134438 | 1047098 | c.3140A>G | p.H1047R | Substitution - Missense | 3:178952085-178952085 |
| 1698889        | 1698889 | 1607007 | c.?       | p.H1047L | Substitution - Missense |                       |
| CGA-EW-A11W-0  | 1900231 | 1788915 | c.1637A>G | p.Q546R  | Substitution - Missense | 3:178936095-178936095 |
| 1972367        | 1972367 | 1858616 | c.?       | p.H1047R | Substitution - Missense |                       |
| 1193570        | 1193570 | 1105466 | c.?       | p.E542K  | Substitution - Missense |                       |
| 1882699        | 1882699 | 1772819 | c.3140A>T | p.H1047L | Substitution - Missense | 3:178952085-178952085 |
| 1443609        | 1443609 | 1367854 | c.?       | p.H1047R | Substitution - Missense |                       |
| 1698528        | 1698528 | 1606646 | c.3140A>G | p.H1047R | Substitution - Missense | 3:178952085-178952085 |
| 1698528        | 1698528 | 1606646 | c.1634A>C | p.E545A  | Substitution - Missense | 3:178936092-178936092 |
| 1193559        | 1193559 | 1105455 | c.?       | p.E545K  | Substitution - Missense |                       |
| 1972450        | 1972450 | 1858699 | c.?       | p.H1047R | Substitution - Missense |                       |
| 1122683        | 1122683 | 1035727 | c.3140A>G | p.H1047R | Substitution - Missense | 3:178952085-178952085 |
| 1321137        | 1321137 | 1232024 | c.3140A>G | p.H1047R | Substitution - Missense | 3:178952085-178952085 |
| HF-11322       | 1507790 | 1430656 | c.3140A>G | p.H1047R | Substitution - Missense | 3:178952085-178952085 |
| HF-11322       | 1507790 | 1430656 | c.1357G>A | p.E453K  | Substitution - Missense | 3:178928079-178928079 |
| 1703732        | 1703732 | 1611841 | c.1624G>A | p.E542K  | Substitution - Missense | 3:178936082-178936082 |
| TCGA-E2-A14U-0 | 2187775 | 2056053 | c.1624G>A | p.E542K  | Substitution - Missense | 3:178936082-178936082 |
| TCGA-A2-A04T-0 | 2187251 | 2055529 | c.3139C>T | p.H1047Y | Substitution - Missense | 3:178952084-178952084 |
| 1720310        | 1720310 | 1627590 | c.?       | p.H1047R | Substitution - Missense |                       |

|               |         |         |           |          |                         |                       |
|---------------|---------|---------|-----------|----------|-------------------------|-----------------------|
| 1703854       | 1703854 | 1611963 | c.3140A>G | p.H1047R | Substitution - Missense | 3:178952085-178952085 |
| 1244920       | 1244920 | 1156626 | c.3140A>G | p.H1047R | Substitution - Missense | 3:178952085-178952085 |
| 1017891       | 1017891 | 935049  | c.1633G>A | p.E545K  | Substitution - Missense | 3:178936091-178936091 |
| 1443742       | 1443742 | 1367987 | c.?       | p.H1047R | Substitution - Missense |                       |
| 1329739       | 1329739 | 1240224 | c.3140A>G | p.H1047R | Substitution - Missense | 3:178952085-178952085 |
| 1244939       | 1244939 | 1156645 | c.3140A>G | p.H1047R | Substitution - Missense | 3:178952085-178952085 |
| 1124257       | 1124257 | 1037300 | c.3140A>G | p.H1047R | Substitution - Missense | 3:178952085-178952085 |
| 1530098       | 1530098 | 1452470 | c.1633G>A | p.E545K  | Substitution - Missense | 3:178936091-178936091 |
| 1443750       | 1443750 | 1367995 | c.?       | p.H1047R | Substitution - Missense |                       |
| 1443946       | 1443946 | 1368191 | c.?       | p.E542K  | Substitution - Missense |                       |
| 1972335       | 1972335 | 1858584 | c.?       | p.H1047L | Substitution - Missense |                       |
| 1124178       | 1124178 | 1037221 | c.3140A>G | p.H1047R | Substitution - Missense | 3:178952085-178952085 |
| 1244796       | 1244796 | 1156502 | c.1624G>A | p.E542K  | Substitution - Missense | 3:178936082-178936082 |
| 1329900       | 1329900 | 1240385 | c.3140A>G | p.H1047R | Substitution - Missense | 3:178952085-178952085 |
| 1972329       | 1972329 | 1858578 | c.?       | p.H1047L | Substitution - Missense |                       |
| CGA-A7-A13G-0 | 1899662 | 1788346 | c.3140A>G | p.H1047R | Substitution - Missense | 3:178952085-178952085 |
| 1244894       | 1244894 | 1156600 | c.3140A>G | p.H1047R | Substitution - Missense | 3:178952085-178952085 |
| 1124610       | 1124610 | 1037653 | c.1633G>A | p.E545K  | Substitution - Missense | 3:178936091-178936091 |
| 1018917       | 1018917 | 935940  | c.1633G>A | p.E545K  | Substitution - Missense | 3:178936091-178936091 |
| 1244769       | 1244769 | 1156475 | c.1035T>A | p.N345K  | Substitution - Missense | 3:178921553-178921553 |
| 1972138       | 1972138 | 1858387 | c.?       | p.E542K  | Substitution - Missense |                       |
| 1739298       | 1739298 | 1645018 | c.?       | p.H1047Y | Substitution - Missense |                       |
| 1698849       | 1698849 | 1606967 | c.?       | p.E545K  | Substitution - Missense |                       |
| CGA-B6-A0RQ-0 | 1899865 | 1788549 | c.1625A>G | p.E542G  | Substitution - Missense | 3:178936083-178936083 |
| 1135854       | 1135854 | 1048418 | c.3140A>G | p.H1047R | Substitution - Missense | 3:178952085-178952085 |
| 2107738       | 2107738 | 1985599 | c.1035T>A | p.N345K  | Substitution - Missense | 3:178921553-178921553 |
| 1972307       | 1972307 | 1858556 | c.?       | p.E545Q  | Substitution - Missense |                       |
| 1017962       | 1017962 | 935120  | c.1633G>A | p.E545K  | Substitution - Missense | 3:178936091-178936091 |
| JIMT-1        | 2165010 | 2033422 | c.?       | p.C420R  | Substitution - Missense |                       |
| 1301957       | 1301957 | 1213008 | c.3140A>G | p.H1047R | Substitution - Missense | 3:178952085-178952085 |
| 1703780       | 1703780 | 1611889 | c.1637A>C | p.Q546P  | Substitution - Missense | 3:178936095-178936095 |
| CAL-51        | 2164986 | 2033398 | c.?       | p.E542K  | Substitution - Missense |                       |
| 1244805       | 1244805 | 1156511 | c.1624G>A | p.E542K  | Substitution - Missense | 3:178936082-178936082 |
| 1703755       | 1703755 | 1611864 | c.1633G>A | p.E545K  | Substitution - Missense | 3:178936091-178936091 |
| 2067912       | 2067912 | 1947705 | c.?       | p.H1047R | Substitution - Missense |                       |
| 1676171       | 1676171 | 1588943 | c.?       | p.H1047R | Substitution - Missense |                       |
| 2             | 1971251 | 1857500 | c.3140A>G | p.H1047R | Substitution - Missense | 3:178952085-178952085 |
| 1703773       | 1703773 | 1611882 | c.1633G>A | p.E545K  | Substitution - Missense | 3:178936091-178936091 |
| 1329575       | 1329575 | 1240060 | c.1633G>A | p.E545K  | Substitution - Missense | 3:178936091-178936091 |
| 1244857       | 1244857 | 1156563 | c.3140A>T | p.H1047L | Substitution - Missense | 3:178952085-178952085 |
| 1835035       | 1835035 | 1730067 | c.?       | p.H1047R | Substitution - Missense |                       |
| 1703758       | 1703758 | 1611867 | c.1633G>A | p.E545K  | Substitution - Missense | 3:178936091-178936091 |
| 1972472       | 1972472 | 1858721 | c.?       | p.H1047R | Substitution - Missense |                       |

|                |         |         |           |          |                         |                       |
|----------------|---------|---------|-----------|----------|-------------------------|-----------------------|
| 904416         | 904416  | 821961  | c.1624G>A | p.E542K  | Substitution - Missense | 3:178936082-178936082 |
| 1017857        | 1017857 | 935015  | c.3140A>G | p.H1047R | Substitution - Missense | 3:178952085-178952085 |
| 1017847        | 1017847 | 935005  | c.1633G>A | p.E545K  | Substitution - Missense | 3:178936091-178936091 |
| 1443754        | 1443754 | 1367999 | c.?       | p.H1047R | Substitution - Missense |                       |
| 1018400        | 1018400 | 935558  | c.3140A>G | p.H1047R | Substitution - Missense | 3:178952085-178952085 |
| 1882698        | 1882698 | 1772818 | c.3140A>G | p.H1047R | Substitution - Missense | 3:178952085-178952085 |
| 1018390        | 1018390 | 935548  | c.3140A>G | p.H1047R | Substitution - Missense | 3:178952085-178952085 |
| 1329571        | 1329571 | 1240056 | c.1633G>A | p.E545K  | Substitution - Missense | 3:178936091-178936091 |
| 1972279        | 1972279 | 1858528 | c.?       | p.E545K  | Substitution - Missense |                       |
| 1443959        | 1443959 | 1368204 | c.?       | p.H1047R | Substitution - Missense |                       |
| 2107719        | 2107719 | 1985580 | c.1633G>A | p.E545K  | Substitution - Missense | 3:178936091-178936091 |
| 1698843        | 1698843 | 1606961 | c.?       | p.E545K  | Substitution - Missense |                       |
| 1691787        | 1691787 | 1600053 | c.?       | p.H1047R | Substitution - Missense |                       |
| 1691790        | 1691790 | 1600056 | c.?       | p.H1047L | Substitution - Missense |                       |
| 1703818        | 1703818 | 1611927 | c.3140A>G | p.H1047R | Substitution - Missense | 3:178952085-178952085 |
| 1135893        | 1135893 | 1048457 | c.1633G>A | p.E545K  | Substitution - Missense | 3:178936091-178936091 |
| 1124128        | 1124128 | 1037171 | c.1633G>A | p.E545K  | Substitution - Missense | 3:178936091-178936091 |
| 1738893        | 1738893 | 1644724 | c.1624G>A | p.E542K  | Substitution - Missense | 3:178936082-178936082 |
| 1017898        | 1017898 | 935056  | c.3140A>G | p.H1047R | Substitution - Missense | 3:178952085-178952085 |
| 1193526        | 1193526 | 1105422 | c.?       | p.H1047R | Substitution - Missense |                       |
| 1972333        | 1972333 | 1858582 | c.?       | p.H1047L | Substitution - Missense |                       |
| HF-11316       | 1507795 | 1430661 | c.3140A>G | p.H1047R | Substitution - Missense | 3:178952085-178952085 |
| 1703860        | 1703860 | 1611969 | c.3140A>G | p.H1047R | Substitution - Missense | 3:178952085-178952085 |
| 901522         | 901522  | 819134  | c.3140A>G | p.H1047R | Substitution - Missense | 3:178952085-178952085 |
| TCGA-B6-A0IK-0 | 1899857 | 1788541 | c.3140A>G | p.H1047R | Substitution - Missense | 3:178952085-178952085 |
| 1135795        | 1135795 | 1048359 | c.3140A>G | p.H1047R | Substitution - Missense | 3:178952085-178952085 |
| 1193566        | 1193566 | 1105462 | c.?       | p.E545K  | Substitution - Missense |                       |
| 901501         | 901501  | 819113  | c.1624G>A | p.E542K  | Substitution - Missense | 3:178936082-178936082 |
| 1530100        | 1530100 | 1452472 | c.1624G>A | p.E542K  | Substitution - Missense | 3:178936082-178936082 |
| 1703725        | 1703725 | 1611834 | c.1624G>A | p.E542K  | Substitution - Missense | 3:178936082-178936082 |
| 1691785        | 1691785 | 1600051 | c.?       | p.H1047R | Substitution - Missense |                       |
| 1443957        | 1443957 | 1368202 | c.?       | p.H1047R | Substitution - Missense |                       |
| 1698887        | 1698887 | 1607005 | c.?       | p.H1047L | Substitution - Missense |                       |
| 1698875        | 1698875 | 1606993 | c.3140A>G | p.H1047R | Substitution - Missense | 3:178952085-178952085 |
| 1703789        | 1703789 | 1611898 | c.3140A>T | p.H1047L | Substitution - Missense | 3:178952085-178952085 |
| TCGA-OL-A5D6-0 | 2187705 | 2055983 | c.1035T>A | p.N345K  | Substitution - Missense | 3:178921553-178921553 |
| 1972527        | 1972527 | 1858776 | c.?       | p.H1047R | Substitution - Missense |                       |
| 1301940        | 1301940 | 1212991 | c.1633G>A | p.E545K  | Substitution - Missense | 3:178936091-178936091 |
| 1676275        | 1676275 | 1589047 | c.?       | p.H1047R | Substitution - Missense |                       |
| 1698856        | 1698856 | 1606974 | c.3140A>G | p.H1047R | Substitution - Missense | 3:178952085-178952085 |
| 1670217        | 1670217 | 1583503 | c.3140A>G | p.H1047R | Substitution - Missense | 3:178952085-178952085 |
| 1321154        | 1321154 | 1232041 | c.3140A>G | p.H1047R | Substitution - Missense | 3:178952085-178952085 |
| 1212746        | 1212746 | 1124613 | c.1633G>A | p.E545K  | Substitution - Missense | 3:178936091-178936091 |

|               |         |         |           |          |                         |                       |
|---------------|---------|---------|-----------|----------|-------------------------|-----------------------|
| 1124268       | 1124268 | 1037311 | c.3145G>C | p.G1049R | Substitution - Missense | 3:178952090-178952090 |
| 1018395       | 1018395 | 935553  | c.3140A>G | p.H1047R | Substitution - Missense | 3:178952085-178952085 |
| 1135880       | 1135880 | 1048444 | c.1633G>A | p.E545K  | Substitution - Missense | 3:178936091-178936091 |
| 1972465       | 1972465 | 1858714 | c.?       | p.H1047R | Substitution - Missense |                       |
| 1972183       | 1972183 | 1858432 | c.?       | p.E542K  | Substitution - Missense |                       |
| 1244820       | 1244820 | 1156526 | c.1633G>A | p.E545K  | Substitution - Missense | 3:178936091-178936091 |
| E40057        | 894109  | 811877  | c.1633G>A | p.E545K  | Substitution - Missense | 3:178936091-178936091 |
| 1301923       | 1301923 | 1212974 | c.1624G>A | p.E542K  | Substitution - Missense | 3:178936082-178936082 |
| 1135907       | 1135907 | 1048471 | c.1035T>A | p.N345K  | Substitution - Missense | 3:178921553-178921553 |
| 1312219       | 1312219 | 1223128 | c.?       | p.H1047R | Substitution - Missense |                       |
| 1321147       | 1321147 | 1232034 | c.3140A>G | p.H1047R | Substitution - Missense | 3:178952085-178952085 |
| 1135846       | 1135846 | 1048410 | c.3140A>G | p.H1047R | Substitution - Missense | 3:178952085-178952085 |
| 1972274       | 1972274 | 1858523 | c.?       | p.E545K  | Substitution - Missense |                       |
| 1720341       | 1720341 | 1627621 | c.?       | p.E545K  | Substitution - Missense |                       |
| CGA-E9-A1R4-0 | 1900200 | 1788884 | c.1633G>A | p.E545K  | Substitution - Missense | 3:178936091-178936091 |
| 1972252       | 1972252 | 1858501 | c.?       | p.E545K  | Substitution - Missense |                       |
| 1297102       | 1297102 | 1208156 | c.?       | p.E542K  | Substitution - Missense |                       |
| 1522790       | 1522790 | 1445162 | c.3059C>T | p.A1020V | Substitution - Missense | 3:178952004-178952004 |
| 1193534       | 1193534 | 1105430 | c.?       | p.H1047R | Substitution - Missense |                       |
| 107086        | 1520557 | 1442932 | c.3140A>G | p.H1047R | Substitution - Missense | 3:178952085-178952085 |
| 1244932       | 1244932 | 1156638 | c.3140A>G | p.H1047R | Substitution - Missense | 3:178952085-178952085 |
| 1301962       | 1301962 | 1213013 | c.3140A>G | p.H1047R | Substitution - Missense | 3:178952085-178952085 |
| 904475        | 904475  | 822020  | c.3139C>T | p.H1047Y | Substitution - Missense | 3:178952084-178952084 |
| 1244938       | 1244938 | 1156644 | c.3140A>G | p.H1047R | Substitution - Missense | 3:178952085-178952085 |
| CGA-E2-A1BD-0 | 1900159 | 1788843 | c.3140A>G | p.H1047R | Substitution - Missense | 3:178952085-178952085 |
| 1698512       | 1698512 | 1606630 | c.1634A>C | p.E545A  | Substitution - Missense | 3:178936092-178936092 |
| 1676241       | 1676241 | 1589013 | c.?       | p.E545K  | Substitution - Missense |                       |
| 1972521       | 1972521 | 1858770 | c.?       | p.H1047R | Substitution - Missense |                       |
| 1670220       | 1670220 | 1583506 | c.3140A>G | p.H1047R | Substitution - Missense | 3:178952085-178952085 |
| 1443953       | 1443953 | 1368198 | c.?       | p.H1047R | Substitution - Missense |                       |
| 1972167       | 1972167 | 1858416 | c.?       | p.E542K  | Substitution - Missense |                       |
| 1122689       | 1122689 | 1035733 | c.3140A>G | p.H1047R | Substitution - Missense | 3:178952085-178952085 |
| 1972551       | 1972551 | 1858800 | c.?       | p.H1047R | Substitution - Missense |                       |
| 1244837       | 1244837 | 1156543 | c.1634A>C | p.E545A  | Substitution - Missense | 3:178936092-178936092 |
| 904463        | 904463  | 822008  | c.3140A>G | p.H1047R | Substitution - Missense | 3:178952085-178952085 |
| 1278874       | 1278874 | 1190170 | c.?       | p.H1047R | Substitution - Missense |                       |
| 1244904       | 1244904 | 1156610 | c.3140A>G | p.H1047R | Substitution - Missense | 3:178952085-178952085 |
| 1972281       | 1972281 | 1858530 | c.?       | p.E545K  | Substitution - Missense |                       |
| MDA-MB-361    | 2165011 | 2033423 | c.?       | p.E545K  | Substitution - Missense |                       |
| 1882737       | 1882737 | 1772857 | c.1624G>A | p.E542K  | Substitution - Missense | 3:178936082-178936082 |
| 1972143       | 1972143 | 1858392 | c.?       | p.E542K  | Substitution - Missense |                       |
| 1135850       | 1135850 | 1048414 | c.3140A>G | p.H1047R | Substitution - Missense | 3:178952085-178952085 |
| 1530126       | 1530126 | 1452498 | c.1624G>A | p.E542K  | Substitution - Missense | 3:178936082-178936082 |

|               |         |         |           |          |                         |                       |
|---------------|---------|---------|-----------|----------|-------------------------|-----------------------|
| 1017836       | 1017836 | 934994  | c.1624G>A | p.E542K  | Substitution - Missense | 3:178936082-178936082 |
| 1703761       | 1703761 | 1611870 | c.1633G>A | p.E545K  | Substitution - Missense | 3:178936091-178936091 |
| 1703808       | 1703808 | 1611917 | c.3140A>G | p.H1047R | Substitution - Missense | 3:178952085-178952085 |
| 1698536       | 1698536 | 1606654 | c.3140A>G | p.H1047R | Substitution - Missense | 3:178952085-178952085 |
| 1443713       | 1443713 | 1367958 | c.?       | p.H1047R | Substitution - Missense |                       |
| T47D          | 1136342 | 1048906 | c.3140A>G | p.H1047R | Substitution - Missense | 3:178952085-178952085 |
| 1972360       | 1972360 | 1858609 | c.?       | p.H1047R | Substitution - Missense |                       |
| 1193387       | 1193387 | 1105283 | c.3140A>G | p.H1047R | Substitution - Missense | 3:178952085-178952085 |
| 1301969       | 1301969 | 1213020 | c.3140A>G | p.H1047R | Substitution - Missense | 3:178952085-178952085 |
| 1244775       | 1244775 | 1156481 | c.1035T>A | p.N345K  | Substitution - Missense | 3:178921553-178921553 |
| 1703753       | 1703753 | 1611862 | c.1633G>A | p.E545K  | Substitution - Missense | 3:178936091-178936091 |
| 1419230       | 1419230 | 1329271 | c.3140A>G | p.H1047R | Substitution - Missense | 3:178952085-178952085 |
| 1193518       | 1193518 | 1105414 | c.?       | p.H1047R | Substitution - Missense |                       |
| 1124130       | 1124130 | 1037173 | c.3140A>G | p.H1047R | Substitution - Missense | 3:178952085-178952085 |
| 1244766       | 1244766 | 1156472 | c.1035T>A | p.N345K  | Substitution - Missense | 3:178921553-178921553 |
| 1244841       | 1244841 | 1156547 | c.1634A>C | p.E545A  | Substitution - Missense | 3:178936092-178936092 |
| 1134444       | 1134444 | 1047104 | c.3140A>G | p.H1047R | Substitution - Missense | 3:178952085-178952085 |
| 57            | 1860502 | 1751443 | c.1633G>A | p.E545K  | Substitution - Missense | 3:178936091-178936091 |
| 1193497       | 1193497 | 1105393 | c.?       | p.H1047R | Substitution - Missense |                       |
| 1017845       | 1017845 | 935003  | c.1633G>A | p.E545K  | Substitution - Missense | 3:178936091-178936091 |
| 1443898       | 1443898 | 1368143 | c.?       | p.E542K  | Substitution - Missense |                       |
| 1329827       | 1329827 | 1240312 | c.3140A>G | p.H1047R | Substitution - Missense | 3:178952085-178952085 |
| BC31          | 1280997 | 1192288 | c.?       | p.E545K  | Substitution - Missense |                       |
| 1124414       | 1124414 | 1037457 | c.3140A>G | p.H1047R | Substitution - Missense | 3:178952085-178952085 |
| 1703828       | 1703828 | 1611937 | c.3140A>G | p.H1047R | Substitution - Missense | 3:178952085-178952085 |
| 1122686       | 1122686 | 1035730 | c.3140A>G | p.H1047R | Substitution - Missense | 3:178952085-178952085 |
| 1972282       | 1972282 | 1858531 | c.?       | p.E545K  | Substitution - Missense |                       |
| CGA-EW-A11Z-0 | 1900234 | 1788918 | c.2017T>A | p.S673T  | Substitution - Missense | 3:178938775-178938775 |
| HF-11317      | 1507794 | 1430660 | c.3140A>G | p.H1047R | Substitution - Missense | 3:178952085-178952085 |
| CGA-C8-A12T-0 | 1900003 | 1788687 | c.1624G>A | p.E542K  | Substitution - Missense | 3:178936082-178936082 |
| PD4119a       | 1331065 | 1241539 | c.1635G>C | p.E545D  | Substitution - Missense | 3:178936093-178936093 |
| 1124240       | 1124240 | 1037283 | c.1634A>G | p.E545G  | Substitution - Missense | 3:178936092-178936092 |
| 904440        | 904440  | 821985  | c.3132T>A | p.N1044K | Substitution - Missense | 3:178952077-178952077 |
| 1972461       | 1972461 | 1858710 | c.?       | p.H1047R | Substitution - Missense |                       |
| 1244871       | 1244871 | 1156577 | c.3140A>G | p.H1047R | Substitution - Missense | 3:178952085-178952085 |
| 1698520       | 1698520 | 1606638 | c.1634A>C | p.E545A  | Substitution - Missense | 3:178936092-178936092 |
| 1321150       | 1321150 | 1232037 | c.3140A>G | p.H1047R | Substitution - Missense | 3:178952085-178952085 |
| E39848        | 894059  | 811827  | c.3140A>G | p.H1047R | Substitution - Missense | 3:178952085-178952085 |
| 1017834       | 1017834 | 934992  | c.1624G>A | p.E542K  | Substitution - Missense | 3:178936082-178936082 |
| 1676180       | 1676180 | 1588952 | c.?       | p.H1047R | Substitution - Missense |                       |
| 1972463       | 1972463 | 1858712 | c.?       | p.H1047R | Substitution - Missense |                       |
| 1703857       | 1703857 | 1611966 | c.3140A>G | p.H1047R | Substitution - Missense | 3:178952085-178952085 |
| 1972260       | 1972260 | 1858509 | c.?       | p.E545K  | Substitution - Missense |                       |

|               |         |         |                  |                |                         |                       |
|---------------|---------|---------|------------------|----------------|-------------------------|-----------------------|
| 1972438       | 1972438 | 1858687 | c.?              | p.H1047R       | Substitution - Missense |                       |
| 1665033       | 1665033 | 1578483 | c.1624G>A        | p.E542K        | Substitution - Missense | 3:178936082-178936082 |
| 1670193       | 1670193 | 1583479 | c.1633G>A        | p.E545K        | Substitution - Missense | 3:178936091-178936091 |
| 1244825       | 1244825 | 1156531 | c.1633G>A        | p.E545K        | Substitution - Missense | 3:178936091-178936091 |
| 1691789       | 1691789 | 1600055 | c.?              | p.H1047R       | Substitution - Missense |                       |
| 1703806       | 1703806 | 1611915 | c.3140A>G        | p.H1047R       | Substitution - Missense | 3:178952085-178952085 |
| 1135838       | 1135838 | 1048402 | c.3140A>G        | p.H1047R       | Substitution - Missense | 3:178952085-178952085 |
| 1419252       | 1419252 | 1329293 | c.3140A>G        | p.H1047R       | Substitution - Missense | 3:178952085-178952085 |
| 1193546       | 1193546 | 1105442 | c.3140A>T        | p.H1047L       | Substitution - Missense | 3:178952085-178952085 |
| 1691736       | 1691736 | 1600002 | c.?              | p.H1047R       | Substitution - Missense |                       |
| 1443712       | 1443712 | 1367957 | c.?              | p.H1047R       | Substitution - Missense |                       |
| 1703749       | 1703749 | 1611858 | c.1633G>A        | p.E545K        | Substitution - Missense | 3:178936091-178936091 |
| 1691746       | 1691746 | 1600012 | c.?              | p.E545K        | Substitution - Missense |                       |
| 1244770       | 1244770 | 1156476 | c.1035T>A        | p.N345K        | Substitution - Missense | 3:178921553-178921553 |
| 1244839       | 1244839 | 1156545 | c.1634A>C        | p.E545A        | Substitution - Missense | 3:178936092-178936092 |
| E40056        | 894108  | 811876  | c.1633G>A        | p.E545K        | Substitution - Missense | 3:178936091-178936091 |
| 1720344       | 1720344 | 1627624 | c.?              | p.E545K        | Substitution - Missense |                       |
| 1193554       | 1193554 | 1105450 | c.?              | p.E545K        | Substitution - Missense |                       |
| 1739303       | 1739303 | 1645023 | c.?              | p.H1047L       | Substitution - Missense |                       |
| 1703728       | 1703728 | 1611837 | c.1624G>A        | p.E542K        | Substitution - Missense | 3:178936082-178936082 |
| 1122691       | 1122691 | 1035735 | c.(1624_1633)G>A | p.(542_545)E>K | Substitution - Missense |                       |
| 1297131       | 1297131 | 1208185 | c.?              | p.H1047R       | Substitution - Missense |                       |
| CGA-A7-A0DB-0 | 1899659 | 1788343 | c.3140A>G        | p.H1047R       | Substitution - Missense | 3:178952085-178952085 |
| SUM190PT      | 1289414 | 1200689 | c.3140A>G        | p.H1047R       | Substitution - Missense | 3:178952085-178952085 |
| 1419226       | 1419226 | 1329267 | c.3140A>G        | p.H1047R       | Substitution - Missense | 3:178952085-178952085 |
| 1419226       | 1419226 | 1329267 | c.1634A>G        | p.E545G        | Substitution - Missense | 3:178936092-178936092 |
| 1698533       | 1698533 | 1606651 | c.1634A>C        | p.E545A        | Substitution - Missense | 3:178936092-178936092 |
| 2042674       | 2042674 | 1923792 | c.1658G>A        | p.S553N        | Substitution - Missense | 3:178936116-178936116 |
| 1329582       | 1329582 | 1240067 | c.3140A>G        | p.H1047R       | Substitution - Missense | 3:178952085-178952085 |
| 2107714       | 2107714 | 1985575 | c.3140A>G        | p.H1047R       | Substitution - Missense | 3:178952085-178952085 |
| 1703768       | 1703768 | 1611877 | c.1633G>A        | p.E545K        | Substitution - Missense | 3:178936091-178936091 |
| 1703746       | 1703746 | 1611855 | c.1633G>A        | p.E545K        | Substitution - Missense | 3:178936091-178936091 |
| 2042674       | 2042674 | 1923792 | c.1633G>A        | p.E545K        | Substitution - Missense | 3:178936091-178936091 |
| 2042674       | 2042674 | 1923792 | c.1543A>G        | p.N515D        | Substitution - Missense | 3:178936001-178936001 |
| 1972303       | 1972303 | 1858552 | c.?              | p.E545K        | Substitution - Missense |                       |
| 1703785       | 1703785 | 1611894 | c.3140A>T        | p.H1047L       | Substitution - Missense | 3:178952085-178952085 |
| 1703775       | 1703775 | 1611884 | c.1633G>A        | p.E545K        | Substitution - Missense | 3:178936091-178936091 |
| 1017179       | 1017179 | 934349  | c.1633G>A        | p.E545K        | Substitution - Missense | 3:178936091-178936091 |
| 1244855       | 1244855 | 1156561 | c.3140A>T        | p.H1047L       | Substitution - Missense | 3:178952085-178952085 |
| 1124385       | 1124385 | 1037428 | c.1624G>A        | p.E542K        | Substitution - Missense | 3:178936082-178936082 |
| 1122680       | 1122680 | 1035724 | c.3140A>G        | p.H1047R       | Substitution - Missense | 3:178952085-178952085 |
| 1703841       | 1703841 | 1611950 | c.3140A>G        | p.H1047R       | Substitution - Missense | 3:178952085-178952085 |
| CGA-C8-A26W-0 | 1900029 | 1788713 | c.3140A>G        | p.H1047R       | Substitution - Missense | 3:178952085-178952085 |

|               |         |         |                  |                |                              |                       |
|---------------|---------|---------|------------------|----------------|------------------------------|-----------------------|
| 1698861       | 1698861 | 1606979 | c.3140A>G        | p.H1047R       | Substitution - Missense      | 3:178952085-178952085 |
| 1321114       | 1321114 | 1232001 | c.1624G>A        | p.E542K        | Substitution - Missense      | 3:178936082-178936082 |
| 1135834       | 1135834 | 1048398 | c.3140A>G        | p.H1047R       | Substitution - Missense      | 3:178952085-178952085 |
| 1703744       | 1703744 | 1611853 | c.1633G>A        | p.E545K        | Substitution - Missense      | 3:178936091-178936091 |
| 904402        | 904402  | 821947  | c.178C>A         | p.Q60K         | Substitution - Missense      | 3:178916791-178916791 |
| 1972291       | 1972291 | 1858540 | c.?              | p.E545K        | Substitution - Missense      |                       |
| 1244858       | 1244858 | 1156564 | c.3140A>T        | p.H1047L       | Substitution - Missense      | 3:178952085-178952085 |
| 1124231       | 1124231 | 1037274 | c.1035T>A        | p.N345K        | Substitution - Missense      | 3:178921553-178921553 |
| CGA-A8-A08R-0 | 1899707 | 1788391 | c.1840T>A        | p.F614I        | Substitution - Missense      | 3:178937452-178937452 |
| CGA-AC-A23H-0 | 2187848 | 2056126 | c.1368G>A        | p.L456L        | Substitution - coding silent | 3:178928090-178928090 |
| CGA-AC-A23H-0 | 2187848 | 2056126 | c.2965C>G        | p.L989V        | Substitution - Missense      | 3:178951910-178951910 |
| CGA-AC-A23H-0 | 2187848 | 2056126 | c.1807G>C        | p.D603H        | Substitution - Missense      | 3:178937419-178937419 |
| CGA-AR-A255-0 | 1899852 | 1788536 | c.1035T>A        | p.N345K        | Substitution - Missense      | 3:178921553-178921553 |
| CGA-AR-A0TZ-0 | 1779497 | 1683496 | c.3140A>G        | p.H1047R       | Substitution - Missense      | 3:178952085-178952085 |
| CGA-B6-A0IE-0 | 1779528 | 1683527 | c.3140A>G        | p.H1047R       | Substitution - Missense      | 3:178952085-178952085 |
| 1124396       | 1124396 | 1037439 | c.1633G>A        | p.E545K        | Substitution - Missense      | 3:178936091-178936091 |
| 1692034       | 1692034 | 1600299 | c.1624G>A        | p.E542K        | Substitution - Missense      | 3:178936082-178936082 |
| 1972378       | 1972378 | 1858627 | c.?              | p.H1047R       | Substitution - Missense      |                       |
| 1244930       | 1244930 | 1156636 | c.3140A>G        | p.H1047R       | Substitution - Missense      | 3:178952085-178952085 |
| 1017840       | 1017840 | 934998  | c.1624G>A        | p.E542K        | Substitution - Missense      | 3:178936082-178936082 |
| 1443741       | 1443741 | 1367986 | c.?              | p.H1047R       | Substitution - Missense      |                       |
| 1670327       | 1670327 | 1583613 | c.3140A>G        | p.H1047R       | Substitution - Missense      | 3:178952085-178952085 |
| 1698508       | 1698508 | 1606626 | c.1624G>A        | p.E542K        | Substitution - Missense      | 3:178936082-178936082 |
| 1676240       | 1676240 | 1589012 | c.?              | p.E545K        | Substitution - Missense      |                       |
| 1676240       | 1676240 | 1589012 | c.3140A>G        | p.H1047R       | Substitution - Missense      | 3:178952085-178952085 |
| 1443730       | 1443730 | 1367975 | c.?              | p.H1047R       | Substitution - Missense      |                       |
| 1329830       | 1329830 | 1240315 | c.3140A>G        | p.H1047R       | Substitution - Missense      | 3:178952085-178952085 |
| 1443958       | 1443958 | 1368203 | c.?              | p.H1047R       | Substitution - Missense      |                       |
| 1135823       | 1135823 | 1048387 | c.3140A>G        | p.H1047R       | Substitution - Missense      | 3:178952085-178952085 |
| 1419244       | 1419244 | 1329285 | c.3140A>G        | p.H1047R       | Substitution - Missense      | 3:178952085-178952085 |
| 1972277       | 1972277 | 1858526 | c.?              | p.E545K        | Substitution - Missense      |                       |
| 1244771       | 1244771 | 1156477 | c.1035T>A        | p.N345K        | Substitution - Missense      | 3:178921553-178921553 |
| 901516        | 901516  | 819128  | c.3140A>G        | p.H1047R       | Substitution - Missense      | 3:178952085-178952085 |
| 1703735       | 1703735 | 1611844 | c.1624G>A        | p.E542K        | Substitution - Missense      | 3:178936082-178936082 |
| 1017850       | 1017850 | 935008  | c.3140A>G        | p.H1047R       | Substitution - Missense      | 3:178952085-178952085 |
| 1444021       | 1444021 | 1368266 | c.?              | p.E542K        | Substitution - Missense      |                       |
| 1444021       | 1444021 | 1368266 | c.?              | p.H1047R       | Substitution - Missense      |                       |
| 1972153       | 1972153 | 1858402 | c.?              | p.E542K        | Substitution - Missense      |                       |
| 1972414       | 1972414 | 1858663 | c.?              | p.H1047R       | Substitution - Missense      |                       |
| BT-20         | 1136370 | 1048934 | c.3140A>G        | p.H1047R       | Substitution - Missense      | 3:178952085-178952085 |
| BT-20         | 1136370 | 1048934 | c.1616C>G        | p.P539R        | Substitution - Missense      | 3:178936074-178936074 |
| 1972354       | 1972354 | 1858603 | c.?              | p.H1047R       | Substitution - Missense      |                       |
| 1122693       | 1122693 | 1035737 | c.(1624_1633)G>A | p.(542_545)E>K | Substitution - Missense      |                       |

|               |         |         |         |           |          |                         |                       |
|---------------|---------|---------|---------|-----------|----------|-------------------------|-----------------------|
|               | 1739277 | 1739277 | 1644999 | c.?       | p.H1047R | Substitution - Missense |                       |
|               | 1530103 | 1530103 | 1452475 | c.1637A>T | p.Q546L  | Substitution - Missense | 3:178936095-178936095 |
|               | 1675752 | 1675752 | 1588622 | c.3140A>G | p.H1047R | Substitution - Missense | 3:178952085-178952085 |
|               | 1972398 | 1972398 | 1858647 | c.?       | p.H1047R | Substitution - Missense |                       |
|               | 1972455 | 1972455 | 1858704 | c.?       | p.H1047R | Substitution - Missense |                       |
|               | 1698892 | 1698892 | 1607010 | c.?       | p.H1047L | Substitution - Missense |                       |
| CGA-BH-A203-0 | 1899991 | 1788675 | 1788675 | c.3140A>G | p.H1047R | Substitution - Missense | 3:178952085-178952085 |
|               | 1972459 | 1972459 | 1858708 | c.?       | p.H1047R | Substitution - Missense |                       |
|               | 1443695 | 1443695 | 1367940 | c.?       | p.H1047R | Substitution - Missense |                       |
|               | 1443695 | 1443695 | 1367940 | c.?       | p.E542K  | Substitution - Missense |                       |
|               | 1017851 | 1017851 | 935009  | c.3140A>G | p.H1047R | Substitution - Missense | 3:178952085-178952085 |
|               | 1124235 | 1124235 | 1037278 | c.1624G>A | p.E542K  | Substitution - Missense | 3:178936082-178936082 |
|               | 1703741 | 1703741 | 1611850 | c.1624G>A | p.E542K  | Substitution - Missense | 3:178936082-178936082 |
|               | 1720283 | 1720283 | 1627563 | c.?       | p.H1047R | Substitution - Missense |                       |
| CGA-BH-A208-0 | 1899993 | 1788677 | 1788677 | c.3140A>G | p.H1047R | Substitution - Missense | 3:178952085-178952085 |
| CGA-A8-A0A6-0 | 2187850 | 2056128 | 2056128 | c.353G>A  | p.G118D  | Substitution - Missense | 3:178917478-178917478 |
|               | 1321132 | 1321132 | 1232019 | c.3140A>G | p.H1047R | Substitution - Missense | 3:178952085-178952085 |
|               | 1675747 | 1675747 | 1588620 | c.3140A>G | p.H1047R | Substitution - Missense | 3:178952085-178952085 |
| CGA-AR-A5QM-C | 2187806 | 2056084 | 2056084 | c.3140A>G | p.H1047R | Substitution - Missense | 3:178952085-178952085 |
|               | 1972541 | 1972541 | 1858790 | c.?       | p.H1047R | Substitution - Missense |                       |
|               | 1691704 | 1691704 | 1599970 | c.?       | p.H1047R | Substitution - Missense |                       |
|               | 103452  | 1520493 | 1442868 | c.2908G>A | p.E970K  | Substitution - Missense | 3:178948136-178948136 |
|               | 1135825 | 1135825 | 1048389 | c.3140A>G | p.H1047R | Substitution - Missense | 3:178952085-178952085 |
|               | 1864124 | 1864124 | 1754976 | c.?       | p.C420R  | Substitution - Missense |                       |
| BT-483        | 1289384 | 1200659 | 1200659 | c.1624G>A | p.E542K  | Substitution - Missense | 3:178936082-178936082 |
|               | 1329564 | 1329564 | 1240049 | c.1624G>A | p.E542K  | Substitution - Missense | 3:178936082-178936082 |
|               | 1443909 | 1443909 | 1368154 | c.?       | p.H1047R | Substitution - Missense |                       |
|               | 1193495 | 1193495 | 1105391 | c.?       | p.H1047R | Substitution - Missense |                       |
| OCUB-F        | 1046937 | 963168  | 963168  | c.3140A>G | p.H1047R | Substitution - Missense | 3:178952085-178952085 |
|               | 1703797 | 1703797 | 1611906 | c.3140A>G | p.H1047R | Substitution - Missense | 3:178952085-178952085 |
|               | 1738931 | 1738931 | 1644762 | c.3073A>K | p.T1025? | Substitution - Missense | 3:178952018-178952018 |
|               | 1698535 | 1698535 | 1606653 | c.1634A>C | p.E545A  | Substitution - Missense | 3:178936092-178936092 |
|               | 1972212 | 1972212 | 1858461 | c.?       | p.E545K  | Substitution - Missense |                       |
|               | 1193389 | 1193389 | 1105285 | c.1639G>A | p.E547K  | Substitution - Missense | 3:178936097-178936097 |
|               | 1443903 | 1443903 | 1368148 | c.?       | p.H1047R | Substitution - Missense |                       |
|               | 1134426 | 1134426 | 1047086 | c.1633G>A | p.E545K  | Substitution - Missense | 3:178936091-178936091 |
| SUM159PT      | 1289412 | 1200687 | 1200687 | c.3140A>T | p.H1047L | Substitution - Missense | 3:178952085-178952085 |
|               | 1703823 | 1703823 | 1611932 | c.3140A>G | p.H1047R | Substitution - Missense | 3:178952085-178952085 |
| CGA-AR-A1AS-0 | 1899825 | 1788509 | 1788509 | c.1634A>C | p.E545A  | Substitution - Missense | 3:178936092-178936092 |
|               | 1864114 | 1864114 | 1754967 | c.?       | p.E542K  | Substitution - Missense |                       |
| CGA-AR-A24M-C | 1899835 | 1788519 | 1788519 | c.1624G>A | p.E542K  | Substitution - Missense | 3:178936082-178936082 |
|               | 1329822 | 1329822 | 1240307 | c.3140A>G | p.H1047R | Substitution - Missense | 3:178952085-178952085 |
|               | 1301977 | 1301977 | 1213028 | c.3140A>G | p.H1047R | Substitution - Missense | 3:178952085-178952085 |



|               |         |         |           |          |                         |                       |
|---------------|---------|---------|-----------|----------|-------------------------|-----------------------|
| 1244849       | 1244849 | 1156555 | c.1637A>G | p.Q546R  | Substitution - Missense | 3:178936095-178936095 |
| 1691791       | 1691791 | 1600057 | c.?       | p.H1047L | Substitution - Missense |                       |
| 1244901       | 1244901 | 1156607 | c.3140A>G | p.H1047R | Substitution - Missense | 3:178952085-178952085 |
| 1135865       | 1135865 | 1048429 | c.3139C>T | p.H1047Y | Substitution - Missense | 3:178952084-178952084 |
| 1435080       | 1435080 | 1344438 | c.?       | p.H1047R | Substitution - Missense |                       |
| 1972347       | 1972347 | 1858596 | c.?       | p.H1047R | Substitution - Missense |                       |
| UACC-893      | 904397  | 821942  | c.3140A>G | p.H1047R | Substitution - Missense | 3:178952085-178952085 |
| 1698532       | 1698532 | 1606650 | c.3140A>G | p.H1047R | Substitution - Missense | 3:178952085-178952085 |
| CGA-B6-A0X5-0 | 1779562 | 1683561 | c.3140A>G | p.H1047R | Substitution - Missense | 3:178952085-178952085 |
| 1419266       | 1419266 | 1329307 | c.1624G>A | p.E542K  | Substitution - Missense | 3:178936082-178936082 |
| 1124594       | 1124594 | 1037637 | c.3140A>G | p.H1047R | Substitution - Missense | 3:178952085-178952085 |
| 901513        | 901513  | 819125  | c.3140A>G | p.H1047R | Substitution - Missense | 3:178952085-178952085 |
| 1972518       | 1972518 | 1858767 | c.?       | p.H1047R | Substitution - Missense |                       |
| 1972322       | 1972322 | 1858571 | c.?       | p.H1047L | Substitution - Missense |                       |
| 1018388       | 1018388 | 935546  | c.3140A>G | p.H1047R | Substitution - Missense | 3:178952085-178952085 |
| CGA-A8-A09C-0 | 1899720 | 1788404 | c.3140A>G | p.H1047R | Substitution - Missense | 3:178952085-178952085 |
| 1691783       | 1691783 | 1600049 | c.?       | p.E545K  | Substitution - Missense |                       |
| 1244854       | 1244854 | 1156560 | c.3140A>T | p.H1047L | Substitution - Missense | 3:178952085-178952085 |
| 1443634       | 1443634 | 1367879 | c.?       | p.E542K  | Substitution - Missense |                       |
| 904441        | 904441  | 821986  | c.3140A>G | p.H1047R | Substitution - Missense | 3:178952085-178952085 |
| 1135833       | 1135833 | 1048397 | c.3140A>G | p.H1047R | Substitution - Missense | 3:178952085-178952085 |
| T47D          | 947353  | 863757  | c.3140A>G | p.H1047R | Substitution - Missense | 3:178952085-178952085 |
| CGA-A8-A0A7-0 | 1899736 | 1788420 | c.2176G>A | p.E726K  | Substitution - Missense | 3:178938934-178938934 |
| CGA-AO-A125-0 | 1899787 | 1788471 | c.1633G>A | p.E545K  | Substitution - Missense | 3:178936091-178936091 |
| CGA-A7-A4SB-0 | 2187861 | 2056139 | c.2908G>A | p.E970K  | Substitution - Missense | 3:178948136-178948136 |
| CGA-C8-A131-0 | 1900011 | 1788695 | c.323G>A  | p.R108H  | Substitution - Missense | 3:178916936-178916936 |
| CGA-C8-A131-0 | 1900011 | 1788695 | c.3140A>G | p.H1047R | Substitution - Missense | 3:178952085-178952085 |
| PD3857a       | 1301772 | 1212825 | c.3140A>G | p.H1047R | Substitution - Missense | 3:178952085-178952085 |
| 1212767       | 1212767 | 1124634 | c.3140A>G | p.H1047R | Substitution - Missense | 3:178952085-178952085 |
| 1443625       | 1443625 | 1367870 | c.?       | p.H1047R | Substitution - Missense |                       |
| 1124397       | 1124397 | 1037440 | c.1633G>A | p.E545K  | Substitution - Missense | 3:178936091-178936091 |
| 1703830       | 1703830 | 1611939 | c.3140A>G | p.H1047R | Substitution - Missense | 3:178952085-178952085 |
| 1017833       | 1017833 | 934991  | c.1624G>A | p.E542K  | Substitution - Missense | 3:178936082-178936082 |
| 1244838       | 1244838 | 1156544 | c.1634A>C | p.E545A  | Substitution - Missense | 3:178936092-178936092 |
| 1124255       | 1124255 | 1037298 | c.3140A>G | p.H1047R | Substitution - Missense | 3:178952085-178952085 |
| 107052        | 1520435 | 1442810 | c.3129G>C | p.M1043I | Substitution - Missense | 3:178952074-178952074 |
| 1124230       | 1124230 | 1037273 | c.?       | p.N345I  | Substitution - Missense |                       |
| 904400        | 904400  | 821945  | c.3140A>T | p.H1047L | Substitution - Missense | 3:178952085-178952085 |
| 904400        | 904400  | 821945  | c.1252G>A | p.E418K  | Substitution - Missense | 3:178927974-178927974 |
| BC125         | 1281091 | 1192382 | c.?       | p.H1047R | Substitution - Missense |                       |
| 1720339       | 1720339 | 1627619 | c.?       | p.E545K  | Substitution - Missense |                       |
| 1773305       | 1773305 | 1677545 | c.1633G>A | p.E545K  | Substitution - Missense | 3:178936091-178936091 |
| 1124423       | 1124423 | 1037466 | c.3140A>G | p.H1047R | Substitution - Missense | 3:178952085-178952085 |

|               |         |         |           |          |                         |                       |
|---------------|---------|---------|-----------|----------|-------------------------|-----------------------|
| 901508        | 901508  | 819120  | c.3140A>G | p.H1047R | Substitution - Missense | 3:178952085-178952085 |
| 1297153       | 1297153 | 1208207 | c.3140A>G | p.H1047R | Substitution - Missense | 3:178952085-178952085 |
| 1709244       | 1709244 | 1617150 | c.?       | p.H1047R | Substitution - Missense |                       |
| 1124242       | 1124242 | 1037285 | c.1633G>A | p.E545K  | Substitution - Missense | 3:178936091-178936091 |
| 1082373       | 1082373 | 997591  | c.93A>G   | p.I31M   | Substitution - Missense | 3:178916706-178916706 |
| MCF7          | 1998454 | 1883526 | c.1633G>A | p.E545K  | Substitution - Missense | 3:178936091-178936091 |
| 1329892       | 1329892 | 1240377 | c.1624G>A | p.E542K  | Substitution - Missense | 3:178936082-178936082 |
| 1692044       | 1692044 | 1600309 | c.1633G>A | p.E545K  | Substitution - Missense | 3:178936091-178936091 |
| 1443707       | 1443707 | 1367952 | c.?       | p.H1047R | Substitution - Missense |                       |
| 1698852       | 1698852 | 1606970 | c.?       | p.Q546K  | Substitution - Missense |                       |
| 1297123       | 1297123 | 1208177 | c.?       | p.H1047R | Substitution - Missense |                       |
| 1691698       | 1691698 | 1599964 | c.?       | p.E545K  | Substitution - Missense |                       |
| 1530128       | 1530128 | 1452500 | c.3140A>T | p.H1047L | Substitution - Missense | 3:178952085-178952085 |
| 1124386       | 1124386 | 1037429 | c.1624G>A | p.E542K  | Substitution - Missense | 3:178936082-178936082 |
| 1972505       | 1972505 | 1858754 | c.?       | p.H1047R | Substitution - Missense |                       |
| 1972206       | 1972206 | 1858455 | c.?       | p.E545K  | Substitution - Missense |                       |
| MCF-7         | 1289391 | 1200666 | c.1633G>A | p.E545K  | Substitution - Missense | 3:178936091-178936091 |
| 1972156       | 1972156 | 1858405 | c.?       | p.E542K  | Substitution - Missense |                       |
| 1443904       | 1443904 | 1368149 | c.?       | p.H1047R | Substitution - Missense |                       |
| 1657038       | 1657038 | 1571693 | c.3140A>G | p.H1047R | Substitution - Missense | 3:178952085-178952085 |
| 1720336       | 1720336 | 1627616 | c.?       | p.H1047R | Substitution - Missense |                       |
| CGA-BH-A0W5-C | 1779647 | 1683646 | c.3140A>G | p.H1047R | Substitution - Missense | 3:178952085-178952085 |
| 1312227       | 1312227 | 1223136 | c.?       | p.E542K  | Substitution - Missense |                       |
| 1703756       | 1703756 | 1611865 | c.1633G>A | p.E545K  | Substitution - Missense | 3:178936091-178936091 |
| 1530104       | 1530104 | 1452476 | c.3140A>T | p.H1047L | Substitution - Missense | 3:178952085-178952085 |
| 1720343       | 1720343 | 1627623 | c.?       | p.E545K  | Substitution - Missense |                       |
| 1972488       | 1972488 | 1858737 | c.?       | p.H1047R | Substitution - Missense |                       |
| 1703817       | 1703817 | 1611926 | c.3140A>G | p.H1047R | Substitution - Missense | 3:178952085-178952085 |
| 1135883       | 1135883 | 1048447 | c.1633G>A | p.E545K  | Substitution - Missense | 3:178936091-178936091 |
| 1972259       | 1972259 | 1858508 | c.?       | p.E545K  | Substitution - Missense |                       |
| 1882723       | 1882723 | 1772843 | c.1624G>A | p.E542K  | Substitution - Missense | 3:178936082-178936082 |
| 1297107       | 1297107 | 1208161 | c.?       | p.H1047R | Substitution - Missense |                       |
| 1691692       | 1691692 | 1599958 | c.?       | p.P539R  | Substitution - Missense |                       |
| 2131995       | 2131995 | 2006058 | c.?       | p.H1047R | Substitution - Missense |                       |
| 1972489       | 1972489 | 1858738 | c.?       | p.H1047R | Substitution - Missense |                       |
| 1443732       | 1443732 | 1367977 | c.?       | p.H1047R | Substitution - Missense |                       |
| 1443745       | 1443745 | 1367990 | c.?       | p.H1047R | Substitution - Missense |                       |
| 1443965       | 1443965 | 1368210 | c.?       | p.H1047R | Substitution - Missense |                       |
| 1435085       | 1435085 | 1344443 | c.?       | p.E545K  | Substitution - Missense |                       |
| 1135901       | 1135901 | 1048465 | c.1624G>A | p.E542K  | Substitution - Missense | 3:178936082-178936082 |
| 47            | 1860500 | 1751441 | c.1624G>A | p.E542K  | Substitution - Missense | 3:178936082-178936082 |
| 1972391       | 1972391 | 1858640 | c.?       | p.H1047R | Substitution - Missense |                       |
| 901521        | 901521  | 819133  | c.3140A>G | p.H1047R | Substitution - Missense | 3:178952085-178952085 |

|               |         |         |           |          |                         |                       |
|---------------|---------|---------|-----------|----------|-------------------------|-----------------------|
| 1972283       | 1972283 | 1858532 | c.?       | p.E545K  | Substitution - Missense |                       |
| 1703794       | 1703794 | 1611903 | c.3140A>G | p.H1047R | Substitution - Missense | 3:178952085-178952085 |
| 1670318       | 1670318 | 1583604 | c.3140A>G | p.H1047R | Substitution - Missense | 3:178952085-178952085 |
| 1703763       | 1703763 | 1611872 | c.1633G>A | p.E545K  | Substitution - Missense | 3:178936091-178936091 |
| 904452        | 904452  | 821997  | c.3140A>G | p.H1047R | Substitution - Missense | 3:178952085-178952085 |
| 1670313       | 1670313 | 1583599 | c.3140A>G | p.H1047R | Substitution - Missense | 3:178952085-178952085 |
| 1135881       | 1135881 | 1048445 | c.1633G>A | p.E545K  | Substitution - Missense | 3:178936091-178936091 |
| 1425135       | 1425135 | 1335163 | c.?       | p.E545K  | Substitution - Missense |                       |
| 10            | 1971259 | 1857508 | c.3140A>T | p.H1047L | Substitution - Missense | 3:178952085-178952085 |
| 1301926       | 1301926 | 1212977 | c.1624G>A | p.E542K  | Substitution - Missense | 3:178936082-178936082 |
| E39850        | 894061  | 811829  | c.1624G>A | p.E542K  | Substitution - Missense | 3:178936082-178936082 |
| 1135815       | 1135815 | 1048379 | c.3140A>G | p.H1047R | Substitution - Missense | 3:178952085-178952085 |
| 103941        | 1520498 | 1442873 | c.3140A>T | p.H1047L | Substitution - Missense | 3:178952085-178952085 |
| 1244764       | 1244764 | 1156470 | c.1035T>A | p.N345K  | Substitution - Missense | 3:178921553-178921553 |
| 1703814       | 1703814 | 1611923 | c.3140A>G | p.H1047R | Substitution - Missense | 3:178952085-178952085 |
| HCC2185       | 1136368 | 1048932 | c.1633G>A | p.E545K  | Substitution - Missense | 3:178936091-178936091 |
| 1244793       | 1244793 | 1156499 | c.1624G>A | p.E542K  | Substitution - Missense | 3:178936082-178936082 |
| 1193511       | 1193511 | 1105407 | c.?       | p.H1047R | Substitution - Missense |                       |
| 1443613       | 1443613 | 1367858 | c.?       | p.H1047R | Substitution - Missense |                       |
| 1773311       | 1773311 | 1677551 | c.3140A>G | p.H1047R | Substitution - Missense | 3:178952085-178952085 |
| 1703813       | 1703813 | 1611922 | c.3140A>G | p.H1047R | Substitution - Missense | 3:178952085-178952085 |
| 1738923       | 1738923 | 1644754 | c.3073A>K | p.T1025? | Substitution - Missense | 3:178952018-178952018 |
| CGA-D8-A1JD-0 | 1900050 | 1788734 | c.3012G>A | p.M1004I | Substitution - Missense | 3:178951957-178951957 |
| CGA-D8-A1JD-0 | 1900050 | 1788734 | c.2176G>A | p.E726K  | Substitution - Missense | 3:178938934-178938934 |
| 1329741       | 1329741 | 1240226 | c.3140A>G | p.H1047R | Substitution - Missense | 3:178952085-178952085 |
| CGA-D8-A1JD-0 | 1900050 | 1788734 | c.1633G>A | p.E545K  | Substitution - Missense | 3:178936091-178936091 |
| 1321122       | 1321122 | 1232009 | c.1633G>A | p.E545K  | Substitution - Missense | 3:178936091-178936091 |
| 1864145       | 1864145 | 1754993 | c.?       | p.H1047R | Substitution - Missense |                       |
| 1244952       | 1244952 | 1156658 | c.3140A>G | p.H1047R | Substitution - Missense | 3:178952085-178952085 |
| 1124389       | 1124389 | 1037432 | c.1624G>A | p.E542K  | Substitution - Missense | 3:178936082-178936082 |
| 1972440       | 1972440 | 1858689 | c.?       | p.H1047R | Substitution - Missense |                       |
| LY-2          | 1136350 | 1048914 | c.1633G>A | p.E545K  | Substitution - Missense | 3:178936091-178936091 |
| 1703863       | 1703863 | 1611972 | c.3132T>A | p.N1044K | Substitution - Missense | 3:178952077-178952077 |
| 1972542       | 1972542 | 1858791 | c.?       | p.H1047R | Substitution - Missense |                       |
| 1972425       | 1972425 | 1858674 | c.?       | p.H1047R | Substitution - Missense |                       |
| 1972169       | 1972169 | 1858418 | c.?       | p.E542K  | Substitution - Missense |                       |
| 1703826       | 1703826 | 1611935 | c.3140A>G | p.H1047R | Substitution - Missense | 3:178952085-178952085 |
| 1703766       | 1703766 | 1611875 | c.1633G>A | p.E545K  | Substitution - Missense | 3:178936091-178936091 |
| CGA-BH-A18H-0 | 1899949 | 1788633 | c.3109G>A | p.E1037K | Substitution - Missense | 3:178952054-178952054 |
| CGA-A7-A0CG-0 | 1899654 | 1788338 | c.3140A>G | p.H1047R | Substitution - Missense | 3:178952085-178952085 |
| CGA-BH-A202-0 | 1899990 | 1788674 | c.3140A>G | p.H1047R | Substitution - Missense | 3:178952085-178952085 |
| CGA-BH-A202-0 | 1899990 | 1788674 | c.1094A>T | p.E365V  | Substitution - Missense | 3:178922325-178922325 |
| CGA-B6-A0RH-0 | 1899861 | 1788545 | c.1633G>A | p.E545K  | Substitution - Missense | 3:178936091-178936091 |

|          |         |         |           |          |                         |                       |
|----------|---------|---------|-----------|----------|-------------------------|-----------------------|
| PD4070a  | 1304442 | 1215490 | c.1035T>A | p.N345K  | Substitution - Missense | 3:178921553-178921553 |
| 1017900  | 1017900 | 935058  | c.3140A>G | p.H1047R | Substitution - Missense | 3:178952085-178952085 |
| 1124135  | 1124135 | 1037178 | c.1633G>A | p.E545K  | Substitution - Missense | 3:178936091-178936091 |
| 1244922  | 1244922 | 1156628 | c.3140A>G | p.H1047R | Substitution - Missense | 3:178952085-178952085 |
| 1703846  | 1703846 | 1611955 | c.3140A>G | p.H1047R | Substitution - Missense | 3:178952085-178952085 |
| Sample_I | 2053322 | 1933575 | c.1633G>A | p.E545K  | Substitution - Missense | 3:178936091-178936091 |
| 1972223  | 1972223 | 1858472 | c.?       | p.E545K  | Substitution - Missense |                       |
| 1443615  | 1443615 | 1367860 | c.?       | p.H1047R | Substitution - Missense |                       |
| 1244786  | 1244786 | 1156492 | c.1624G>A | p.E542K  | Substitution - Missense | 3:178936082-178936082 |
| 1698870  | 1698870 | 1606988 | c.3140A>G | p.H1047R | Substitution - Missense | 3:178952085-178952085 |
| 904456   | 904456  | 822001  | c.3140A>G | p.H1047R | Substitution - Missense | 3:178952085-178952085 |
| MFM-223  | 2165000 | 2033412 | c.?       | p.H1047R | Substitution - Missense |                       |
| 1124259  | 1124259 | 1037302 | c.3140A>G | p.H1047R | Substitution - Missense | 3:178952085-178952085 |
| 1329833  | 1329833 | 1240318 | c.3140A>T | p.H1047L | Substitution - Missense | 3:178952085-178952085 |
| 1193550  | 1193550 | 1105446 | c.?       | p.E545K  | Substitution - Missense |                       |
| 1972213  | 1972213 | 1858462 | c.?       | p.E545K  | Substitution - Missense |                       |
| 1443726  | 1443726 | 1367971 | c.?       | p.H1047R | Substitution - Missense |                       |
| 1135801  | 1135801 | 1048365 | c.3140A>G | p.H1047R | Substitution - Missense | 3:178952085-178952085 |
| 1972147  | 1972147 | 1858396 | c.?       | p.E542K  | Substitution - Missense |                       |
| 1972241  | 1972241 | 1858490 | c.?       | p.E545K  | Substitution - Missense |                       |
| 1244875  | 1244875 | 1156581 | c.3140A>G | p.H1047R | Substitution - Missense | 3:178952085-178952085 |
| 1443733  | 1443733 | 1367978 | c.?       | p.H1047R | Substitution - Missense |                       |
| 1312251  | 1312251 | 1223160 | c.?       | p.E545K  | Substitution - Missense |                       |
| 1972365  | 1972365 | 1858614 | c.?       | p.H1047R | Substitution - Missense |                       |
| 1739274  | 1739274 | 1644996 | c.?       | p.H1047R | Substitution - Missense |                       |
| 1675740  | 1675740 | 1588616 | c.3140A>G | p.H1047R | Substitution - Missense | 3:178952085-178952085 |
| 1443721  | 1443721 | 1367966 | c.?       | p.H1047R | Substitution - Missense |                       |
| 1972159  | 1972159 | 1858408 | c.?       | p.E542K  | Substitution - Missense |                       |
| 1443731  | 1443731 | 1367976 | c.?       | p.H1047R | Substitution - Missense |                       |
| 2107733  | 2107733 | 1985594 | c.3140A>G | p.H1047R | Substitution - Missense | 3:178952085-178952085 |
| 1676281  | 1676281 | 1589053 | c.?       | p.H1047R | Substitution - Missense |                       |
| 1698526  | 1698526 | 1606644 | c.1633G>A | p.E545K  | Substitution - Missense | 3:178936091-178936091 |
| 1703731  | 1703731 | 1611840 | c.1624G>A | p.E542K  | Substitution - Missense | 3:178936082-178936082 |
| 1972261  | 1972261 | 1858510 | c.?       | p.E545K  | Substitution - Missense |                       |
| 1443704  | 1443704 | 1367949 | c.?       | p.H1047L | Substitution - Missense |                       |
| 1738889  | 1738889 | 1644720 | c.328G>A  | p.E110K  | Substitution - Missense | 3:178916941-178916941 |
| 2042625  | 2042625 | 1923743 | c.1637A>T | p.Q546L  | Substitution - Missense | 3:178936095-178936095 |
| 1703864  | 1703864 | 1611973 | c.3145G>C | p.G1049R | Substitution - Missense | 3:178952090-178952090 |
| 1972342  | 1972342 | 1858591 | c.?       | p.H1047L | Substitution - Missense |                       |
| 1017844  | 1017844 | 935002  | c.1633G>A | p.E545K  | Substitution - Missense | 3:178936091-178936091 |
| E40063   | 894115  | 811883  | c.1636C>G | p.Q546E  | Substitution - Missense | 3:178936094-178936094 |
| 2107735  | 2107735 | 1985596 | c.1624G>A | p.E542K  | Substitution - Missense | 3:178936082-178936082 |
| 1739273  | 1739273 | 1644995 | c.?       | p.H1047R | Substitution - Missense |                       |

|               |         |         |           |          |                         |                       |
|---------------|---------|---------|-----------|----------|-------------------------|-----------------------|
| CGA-E2-A156-0 | 1900129 | 1788813 | c.1624G>A | p.E542K  | Substitution - Missense | 3:178936082-178936082 |
| PD4125a       | 1331077 | 1241551 | c.241G>A  | p.E81K   | Substitution - Missense | 3:178916854-178916854 |
| 1972411       | 1972411 | 1858660 | c.?       | p.H1047R | Substitution - Missense |                       |
| 1135803       | 1135803 | 1048367 | c.3140A>G | p.H1047R | Substitution - Missense | 3:178952085-178952085 |
| PD4125a       | 1331077 | 1241551 | c.238G>A  | p.E80K   | Substitution - Missense | 3:178916851-178916851 |
| CGA-BH-A0BC-0 | 1779578 | 1683577 | c.3140A>T | p.H1047L | Substitution - Missense | 3:178952085-178952085 |
| 1244762       | 1244762 | 1156468 | c.1035T>A | p.N345K  | Substitution - Missense | 3:178921553-178921553 |
| 1124191       | 1124191 | 1037234 | c.3140A>G | p.H1047R | Substitution - Missense | 3:178952085-178952085 |
| 1691699       | 1691699 | 1599965 | c.?       | p.E545K  | Substitution - Missense |                       |
| 1443966       | 1443966 | 1368211 | c.?       | p.H1047R | Substitution - Missense |                       |
| 1972413       | 1972413 | 1858662 | c.?       | p.H1047R | Substitution - Missense |                       |
| 2107725       | 2107725 | 1985586 | c.3140A>G | p.H1047R | Substitution - Missense | 3:178952085-178952085 |
| 1018399       | 1018399 | 935557  | c.3140A>G | p.H1047R | Substitution - Missense | 3:178952085-178952085 |
| 1329903       | 1329903 | 1240388 | c.3140A>G | p.H1047R | Substitution - Missense | 3:178952085-178952085 |
| 1135859       | 1135859 | 1048423 | c.3140A>G | p.H1047R | Substitution - Missense | 3:178952085-178952085 |
| 1017853       | 1017853 | 935011  | c.3140A>G | p.H1047R | Substitution - Missense | 3:178952085-178952085 |
| 1017889       | 1017889 | 935047  | c.1633G>A | p.E545K  | Substitution - Missense | 3:178936091-178936091 |
| MDA-MB453     | 1308995 | 1219940 | c.?       | p.H1047R | Substitution - Missense |                       |
| 1675745       | 1675745 | 1588619 | c.3140A>G | p.H1047R | Substitution - Missense | 3:178952085-178952085 |
| E40065        | 894117  | 811885  | c.3140A>G | p.H1047R | Substitution - Missense | 3:178952085-178952085 |
| 1972559       | 1972559 | 1858808 | c.?       | p.H1047R | Substitution - Missense |                       |
| 1312245       | 1312245 | 1223154 | c.?       | p.H1047R | Substitution - Missense |                       |
| 1124245       | 1124245 | 1037288 | c.1633G>A | p.E545K  | Substitution - Missense | 3:178936091-178936091 |
| 1135822       | 1135822 | 1048386 | c.3140A>G | p.H1047R | Substitution - Missense | 3:178952085-178952085 |
| CGA-A2-A0EQ-0 | 1779290 | 1683289 | c.3140A>G | p.H1047R | Substitution - Missense | 3:178952085-178952085 |
| 904434        | 904434  | 821979  | c.1633G>A | p.E545K  | Substitution - Missense | 3:178936091-178936091 |
| 1972257       | 1972257 | 1858506 | c.?       | p.E545K  | Substitution - Missense |                       |
| 1134440       | 1134440 | 1047100 | c.1624G>A | p.E542K  | Substitution - Missense | 3:178936082-178936082 |
| 1698881       | 1698881 | 1606999 | c.3140A>G | p.H1047R | Substitution - Missense | 3:178952085-178952085 |
| 1703858       | 1703858 | 1611967 | c.3140A>G | p.H1047R | Substitution - Missense | 3:178952085-178952085 |
| E40059        | 894111  | 811879  | c.1633G>A | p.E545K  | Substitution - Missense | 3:178936091-178936091 |
| 1301970       | 1301970 | 1213021 | c.3140A>G | p.H1047R | Substitution - Missense | 3:178952085-178952085 |
| 1972543       | 1972543 | 1858792 | c.?       | p.H1047R | Substitution - Missense |                       |
| 1972399       | 1972399 | 1858648 | c.?       | p.H1047R | Substitution - Missense |                       |
| 1443954       | 1443954 | 1368199 | c.?       | p.H1047R | Substitution - Missense |                       |
| CGA-E2-A15K-0 | 1900143 | 1788827 | c.3140A>G | p.H1047R | Substitution - Missense | 3:178952085-178952085 |
| 1972515       | 1972515 | 1858764 | c.?       | p.H1047R | Substitution - Missense |                       |
| 1972180       | 1972180 | 1858429 | c.?       | p.E542K  | Substitution - Missense |                       |
| BT-483        | 894085  | 811853  | c.1624G>A | p.E542K  | Substitution - Missense | 3:178936082-178936082 |
| 1691784       | 1691784 | 1600050 | c.?       | p.H1047R | Substitution - Missense |                       |
| 1720255       | 1720255 | 1627535 | c.?       | p.H1047R | Substitution - Missense |                       |
| 1297122       | 1297122 | 1208176 | c.?       | p.H1047R | Substitution - Missense |                       |
| CGA-BH-A0DK-0 | 1899913 | 1788597 | c.1258T>C | p.C420R  | Substitution - Missense | 3:178927980-178927980 |

|               |         |         |           |          |                         |                       |
|---------------|---------|---------|-----------|----------|-------------------------|-----------------------|
| 1698888       | 1698888 | 1607006 | c.?       | p.H1047L | Substitution - Missense |                       |
| CGA-E2-A105-0 | 1900103 | 1788787 | c.3140A>G | p.H1047R | Substitution - Missense | 3:178952085-178952085 |
| CGA-A8-A084-0 | 1899693 | 1788377 | c.1624G>A | p.E542K  | Substitution - Missense | 3:178936082-178936082 |
| CGA-D8-A1JP-0 | 1900061 | 1788745 | c.333G>C  | p.K111N  | Substitution - Missense | 3:178916946-178916946 |
| CGA-BH-A0B6-0 | 2187798 | 2056076 | c.1357G>A | p.E453K  | Substitution - Missense | 3:178928079-178928079 |
| CGA-BH-A0B6-0 | 2187798 | 2056076 | c.241G>A  | p.E81K   | Substitution - Missense | 3:178916854-178916854 |
| CGA-AC-A2FO-0 | 2187839 | 2056117 | c.1633G>A | p.E545K  | Substitution - Missense | 3:178936091-178936091 |
| CGA-A8-A093-0 | 1899715 | 1788399 | c.1636C>A | p.Q546K  | Substitution - Missense | 3:178936094-178936094 |
| CGA-GM-A3NW-( | 2187727 | 2056005 | c.1033A>C | p.N345H  | Substitution - Missense | 3:178921551-178921551 |
| 2107709       | 2107709 | 1985570 | c.3140A>G | p.H1047R | Substitution - Missense | 3:178952085-178952085 |
| 1691711       | 1691711 | 1599977 | c.?       | p.H1047R | Substitution - Missense |                       |
| 1312248       | 1312248 | 1223157 | c.?       | p.E545K  | Substitution - Missense |                       |
| 1302098       | 1302098 | 1213149 | c.3140A>G | p.H1047R | Substitution - Missense | 3:178952085-178952085 |
| 1312253       | 1312253 | 1223162 | c.?       | p.E542K  | Substitution - Missense |                       |
| 1703800       | 1703800 | 1611909 | c.3140A>G | p.H1047R | Substitution - Missense | 3:178952085-178952085 |
| 1301980       | 1301980 | 1213031 | c.3140A>T | p.H1047L | Substitution - Missense | 3:178952085-178952085 |
| 1972172       | 1972172 | 1858421 | c.?       | p.E542K  | Substitution - Missense |                       |
| 1972221       | 1972221 | 1858470 | c.?       | p.E545K  | Substitution - Missense |                       |
| 1301948       | 1301948 | 1212999 | c.3132T>A | p.N1044K | Substitution - Missense | 3:178952077-178952077 |
| BT-20         | 1289382 | 1200657 | c.3140A>G | p.H1047R | Substitution - Missense | 3:178952085-178952085 |
| BT-20         | 1289382 | 1200657 | c.1616C>G | p.P539R  | Substitution - Missense | 3:178936074-178936074 |
| 1329751       | 1329751 | 1240236 | c.3127A>G | p.M1043V | Substitution - Missense | 3:178952072-178952072 |
| 1657033       | 1657033 | 1571688 | c.3140A>G | p.H1047R | Substitution - Missense | 3:178952085-178952085 |
| 1972236       | 1972236 | 1858485 | c.?       | p.E545K  | Substitution - Missense |                       |
| BC103         | 1281069 | 1192360 | c.?       | p.G1049R | Substitution - Missense |                       |
| 1244931       | 1244931 | 1156637 | c.3140A>G | p.H1047R | Substitution - Missense | 3:178952085-178952085 |
| 1675757       | 1675757 | 1588625 | c.3140A>G | p.H1047R | Substitution - Missense | 3:178952085-178952085 |
| 1124419       | 1124419 | 1037462 | c.3140A>G | p.H1047R | Substitution - Missense | 3:178952085-178952085 |
| 1972224       | 1972224 | 1858473 | c.?       | p.E545K  | Substitution - Missense |                       |
| 1124258       | 1124258 | 1037301 | c.3140A>G | p.H1047R | Substitution - Missense | 3:178952085-178952085 |
| 1124264       | 1124264 | 1037307 | c.3140A>G | p.H1047R | Substitution - Missense | 3:178952085-178952085 |
| 1738919       | 1738919 | 1644750 | c.3073A>K | p.T1025? | Substitution - Missense | 3:178952018-178952018 |
| T47D          | 1018470 | 935628  | c.3140A>G | p.H1047R | Substitution - Missense | 3:178952085-178952085 |
| 901524        | 901524  | 819136  | c.3140A>T | p.H1047L | Substitution - Missense | 3:178952085-178952085 |
| 1193538       | 1193538 | 1105434 | c.?       | p.H1047R | Substitution - Missense |                       |
| 1703809       | 1703809 | 1611918 | c.3140A>G | p.H1047R | Substitution - Missense | 3:178952085-178952085 |
| 1670191       | 1670191 | 1583477 | c.1633G>A | p.E545K  | Substitution - Missense | 3:178936091-178936091 |
| 1443646       | 1443646 | 1367891 | c.?       | p.H1047R | Substitution - Missense |                       |
| 1443755       | 1443755 | 1368000 | c.?       | p.H1047R | Substitution - Missense |                       |
| 1738907       | 1738907 | 1644738 | c.3140A>G | p.H1047R | Substitution - Missense | 3:178952085-178952085 |
| CGA-B6-A0RN-0 | 1779544 | 1683543 | c.3140A>G | p.H1047R | Substitution - Missense | 3:178952085-178952085 |
| 1244797       | 1244797 | 1156503 | c.1624G>A | p.E542K  | Substitution - Missense | 3:178936082-178936082 |
| 1443907       | 1443907 | 1368152 | c.?       | p.H1047R | Substitution - Missense |                       |

|                |         |         |                 |           |                         |                       |
|----------------|---------|---------|-----------------|-----------|-------------------------|-----------------------|
| 1670192        | 1670192 | 1583478 | c.1633G>A       | p.E545K   | Substitution - Missense | 3:178936091-178936091 |
| 1675759        | 1675759 | 1588626 | c.3140A>T       | p.H1047L  | Substitution - Missense | 3:178952085-178952085 |
| 1738922        | 1738922 | 1644753 | c.3073A>K       | p.T1025?  | Substitution - Missense | 3:178952018-178952018 |
| 1244821        | 1244821 | 1156527 | c.1633G>A       | p.E545K   | Substitution - Missense | 3:178936091-178936091 |
| 1244818        | 1244818 | 1156524 | c.1633G>A       | p.E545K   | Substitution - Missense | 3:178936091-178936091 |
| 1972474        | 1972474 | 1858723 | c.?             | p.H1047R  | Substitution - Missense |                       |
| 1972187        | 1972187 | 1858436 | c.?             | p.E542K   | Substitution - Missense |                       |
| 1301949        | 1301949 | 1213000 | c.3130A>T       | p.N1044Y  | Substitution - Missense | 3:178952075-178952075 |
| 107428         | 1520568 | 1442943 | c.3140A>G       | p.H1047R  | Substitution - Missense | 3:178952085-178952085 |
| 1244900        | 1244900 | 1156606 | c.3140A>G       | p.H1047R  | Substitution - Missense | 3:178952085-178952085 |
| 1018409        | 1018409 | 935567  | c.1634A>C       | p.E545A   | Substitution - Missense | 3:178936092-178936092 |
| TCGA-C8-A133-0 | 1900013 | 1788697 | c.1633G>A       | p.E545K   | Substitution - Missense | 3:178936091-178936091 |
| 1321125        | 1321125 | 1232012 | c.1633G>A       | p.E545K   | Substitution - Missense | 3:178936091-178936091 |
| 1972325        | 1972325 | 1858574 | c.?             | p.H1047L  | Substitution - Missense |                       |
| MDA-MB-453     | 904383  | 821928  | c.3140A>G       | p.H1047R  | Substitution - Missense | 3:178952085-178952085 |
| 904466         | 904466  | 822011  | c.3140A>G       | p.H1047R  | Substitution - Missense | 3:178952085-178952085 |
| TCGA-OL-A5DA-0 | 2187702 | 2055980 | c.1357G>A       | p.E453K   | Substitution - Missense | 3:178928079-178928079 |
| 1972244        | 1972244 | 1858493 | c.?             | p.E545K   | Substitution - Missense |                       |
| 1278878        | 1278878 | 1190174 | c.?             | p.H1047R  | Substitution - Missense |                       |
| 1972500        | 1972500 | 1858749 | c.?             | p.H1047R  | Substitution - Missense |                       |
| CGA-EW-A3E8-0  | 2187745 | 2056023 | c.1633G>A       | p.E545K   | Substitution - Missense | 3:178936091-178936091 |
| 1443736        | 1443736 | 1367981 | c.?             | p.H1047R  | Substitution - Missense |                       |
| 1329570        | 1329570 | 1240055 | c.1624G>A       | p.E542K   | Substitution - Missense | 3:178936082-178936082 |
| 1329596        | 1329596 | 1240081 | c.3140A>G       | p.H1047R  | Substitution - Missense | 3:178952085-178952085 |
| TCGA-BH-A181-0 | 1899950 | 1788634 | c.1624G>A       | p.E542K   | Substitution - Missense | 3:178936082-178936082 |
| 1720334        | 1720334 | 1627614 | c.?             | p.H1047R  | Substitution - Missense |                       |
| BC100          | 1281066 | 1192357 | c.?             | p.H1047R  | Substitution - Missense |                       |
| 1329576        | 1329576 | 1240061 | c.1633G>A       | p.E545K   | Substitution - Missense | 3:178936091-178936091 |
| 1972258        | 1972258 | 1858507 | c.?             | p.E545K   | Substitution - Missense |                       |
| 1882719        | 1882719 | 1772839 | c.3140A>T       | p.H1047L  | Substitution - Missense | 3:178952085-178952085 |
| 1443956        | 1443956 | 1368201 | c.?             | p.H1047R  | Substitution - Missense |                       |
| 1972524        | 1972524 | 1858773 | c.?             | p.H1047R  | Substitution - Missense |                       |
| 1972198        | 1972198 | 1858447 | c.?             | p.E545G   | Substitution - Missense |                       |
| 904404         | 904404  | 821949  | c.1035T>A       | p.N345K   | Substitution - Missense | 3:178921553-178921553 |
| 1212756        | 1212756 | 1124623 | c.3140A>G       | p.H1047R  | Substitution - Missense | 3:178952085-178952085 |
| TCGA-BH-A0HA-0 | 1899939 | 1788623 | c.325_327delGAA | p.E109del | Deletion - In frame     | 3:178916938-178916940 |
| 1124236        | 1124236 | 1037279 | c.1624G>A       | p.E542K   | Substitution - Missense | 3:178936082-178936082 |
| 1972326        | 1972326 | 1858575 | c.?             | p.H1047L  | Substitution - Missense |                       |
| 1297154        | 1297154 | 1208208 | c.3140A>G       | p.H1047R  | Substitution - Missense | 3:178952085-178952085 |
| 1972290        | 1972290 | 1858539 | c.?             | p.E545K   | Substitution - Missense |                       |
| 1703792        | 1703792 | 1611901 | c.3140A>T       | p.H1047L  | Substitution - Missense | 3:178952085-178952085 |
| 1972163        | 1972163 | 1858412 | c.?             | p.E542K   | Substitution - Missense |                       |
| 5              | 1971254 | 1857503 | c.3140A>G       | p.H1047R  | Substitution - Missense | 3:178952085-178952085 |

|               |         |         |           |          |                         |                       |
|---------------|---------|---------|-----------|----------|-------------------------|-----------------------|
| 1212745       | 1212745 | 1124612 | c.1633G>A | p.E545K  | Substitution - Missense | 3:178936091-178936091 |
| PD4135a       | 1331103 | 1241577 | c.1633G>A | p.E545K  | Substitution - Missense | 3:178936091-178936091 |
| PD4108a       | 1317051 | 1227955 | c.3140A>G | p.H1047R | Substitution - Missense | 3:178952085-178952085 |
| PD4110a       | 1317055 | 1227959 | c.3140A>G | p.H1047R | Substitution - Missense | 3:178952085-178952085 |
| CGA-GM-A2DD-( | 2187736 | 2056014 | c.3140A>G | p.H1047R | Substitution - Missense | 3:178952085-178952085 |
| CGA-AR-A24S-0 | 1899841 | 1788525 | c.1624G>A | p.E542K  | Substitution - Missense | 3:178936082-178936082 |
| 1244953       | 1244953 | 1156659 | c.3140A>G | p.H1047R | Substitution - Missense | 3:178952085-178952085 |
| MDA-MB-453    | 1289401 | 1200676 | c.3140A>G | p.H1047R | Substitution - Missense | 3:178952085-178952085 |
| 1329717       | 1329717 | 1240202 | c.1633G>A | p.E545K  | Substitution - Missense | 3:178936091-178936091 |
| MDA-MB361     | 1308994 | 1219939 | c.?       | p.E545K  | Substitution - Missense |                       |
| 1312226       | 1312226 | 1223135 | c.?       | p.E545K  | Substitution - Missense |                       |
| 1124251       | 1124251 | 1037294 | c.3140A>T | p.H1047L | Substitution - Missense | 3:178952085-178952085 |
| 1972228       | 1972228 | 1858477 | c.?       | p.E545K  | Substitution - Missense |                       |
| 1244881       | 1244881 | 1156587 | c.3140A>G | p.H1047R | Substitution - Missense | 3:178952085-178952085 |
| 1972286       | 1972286 | 1858535 | c.?       | p.E545K  | Substitution - Missense |                       |
| 2042675       | 2042675 | 1923793 | c.?       | p.?      | Unknown                 |                       |
| E40068        | 894120  | 811888  | c.3140A>G | p.H1047R | Substitution - Missense | 3:178952085-178952085 |
| 1018380       | 1018380 | 935538  | c.1634A>C | p.E545A  | Substitution - Missense | 3:178936092-178936092 |
| 1018380       | 1018380 | 935538  | c.3140A>G | p.H1047R | Substitution - Missense | 3:178952085-178952085 |
| 904469        | 904469  | 822014  | c.3140A>G | p.H1047R | Substitution - Missense | 3:178952085-178952085 |
| 1882697       | 1882697 | 1772817 | c.1633G>A | p.E545K  | Substitution - Missense | 3:178936091-178936091 |
| HCC1954       | 1935009 | 1821943 | c.?       | p.H1047R | Substitution - Missense |                       |
| 1443950       | 1443950 | 1368195 | c.?       | p.H1047R | Substitution - Missense |                       |
| 1244910       | 1244910 | 1156616 | c.3140A>G | p.H1047R | Substitution - Missense | 3:178952085-178952085 |
| 1193572       | 1193572 | 1105468 | c.?       | p.E542K  | Substitution - Missense |                       |
| 1972238       | 1972238 | 1858487 | c.?       | p.E545K  | Substitution - Missense |                       |
| BC53          | 1281019 | 1192310 | c.?       | p.H1047R | Substitution - Missense |                       |
| 1301981       | 1301981 | 1213032 | c.3140A>T | p.H1047L | Substitution - Missense | 3:178952085-178952085 |
| 1321140       | 1321140 | 1232027 | c.3140A>G | p.H1047R | Substitution - Missense | 3:178952085-178952085 |
| 1972239       | 1972239 | 1858488 | c.?       | p.E545K  | Substitution - Missense |                       |
| 904444        | 904444  | 821989  | c.3140A>G | p.H1047R | Substitution - Missense | 3:178952085-178952085 |
| 1135858       | 1135858 | 1048422 | c.3140A>G | p.H1047R | Substitution - Missense | 3:178952085-178952085 |
| 1244941       | 1244941 | 1156647 | c.3140A>G | p.H1047R | Substitution - Missense | 3:178952085-178952085 |
| 1698521       | 1698521 | 1606639 | c.1634A>C | p.E545A  | Substitution - Missense | 3:178936092-178936092 |
| 1321131       | 1321131 | 1232018 | c.3140A>G | p.H1047R | Substitution - Missense | 3:178952085-178952085 |
| CGA-A8-A081-0 | 1899690 | 1788374 | c.3140A>G | p.H1047R | Substitution - Missense | 3:178952085-178952085 |
| 1124165       | 1124165 | 1037208 | c.1633G>A | p.E545K  | Substitution - Missense | 3:178936091-178936091 |
| CGA-B6-A0RP-0 | 1899864 | 1788548 | c.1035T>A | p.N345K  | Substitution - Missense | 3:178921553-178921553 |
| 1709245       | 1709245 | 1617151 | c.?       | p.H1047R | Substitution - Missense |                       |
| 1018382       | 1018382 | 935540  | c.3140A>G | p.H1047R | Substitution - Missense | 3:178952085-178952085 |
| 1124406       | 1124406 | 1037449 | c.3140A>G | p.H1047R | Substitution - Missense | 3:178952085-178952085 |
| 1692043       | 1692043 | 1600308 | c.1633G>A | p.E545K  | Substitution - Missense | 3:178936091-178936091 |
| 1972324       | 1972324 | 1858573 | c.?       | p.H1047L | Substitution - Missense |                       |



|               |         |         |           |          |                         |                       |
|---------------|---------|---------|-----------|----------|-------------------------|-----------------------|
| 1443951       | 1443951 | 1368196 | c.?       | p.H1047R | Substitution - Missense |                       |
| 1419245       | 1419245 | 1329286 | c.3140A>G | p.H1047R | Substitution - Missense | 3:178952085-178952085 |
| 1301938       | 1301938 | 1212989 | c.1633G>A | p.E545K  | Substitution - Missense | 3:178936091-178936091 |
| E39841        | 894052  | 811820  | c.263G>A  | p.R88Q   | Substitution - Missense | 3:178916876-178916876 |
| 904462        | 904462  | 822007  | c.3140A>G | p.H1047R | Substitution - Missense | 3:178952085-178952085 |
| 1018396       | 1018396 | 935554  | c.3140A>G | p.H1047R | Substitution - Missense | 3:178952085-178952085 |
| 1419250       | 1419250 | 1329291 | c.3140A>G | p.H1047R | Substitution - Missense | 3:178952085-178952085 |
| 1703835       | 1703835 | 1611944 | c.3140A>G | p.H1047R | Substitution - Missense | 3:178952085-178952085 |
| 1244828       | 1244828 | 1156534 | c.1633G>A | p.E545K  | Substitution - Missense | 3:178936091-178936091 |
| 1692230       | 1692230 | 1600495 | c.?       | p.H1047R | Substitution - Missense |                       |
| 1972185       | 1972185 | 1858434 | c.?       | p.E542K  | Substitution - Missense |                       |
| 1018389       | 1018389 | 935547  | c.3140A>G | p.H1047R | Substitution - Missense | 3:178952085-178952085 |
| BT-474        | 904351  | 821896  | c.333G>C  | p.K111N  | Substitution - Missense | 3:178916946-178916946 |
| CGA-B6-A0RO-0 | 1779545 | 1683544 | c.3140A>G | p.H1047R | Substitution - Missense | 3:178952085-178952085 |
| CGA-D8-A27L-0 | 1900096 | 1788780 | c.1633G>A | p.E545K  | Substitution - Missense | 3:178936091-178936091 |
| 2131986       | 2131986 | 2006049 | c.?       | p.E545K  | Substitution - Missense |                       |
| 1698525       | 1698525 | 1606643 | c.3139C>T | p.H1047Y | Substitution - Missense | 3:178952084-178952084 |
| 1691694       | 1691694 | 1599960 | c.?       | p.E542K  | Substitution - Missense |                       |
| 1301975       | 1301975 | 1213026 | c.3140A>G | p.H1047R | Substitution - Missense | 3:178952085-178952085 |
| 1698525       | 1698525 | 1606643 | c.1634A>C | p.E545A  | Substitution - Missense | 3:178936092-178936092 |
| 1135873       | 1135873 | 1048437 | c.1633G>A | p.E545K  | Substitution - Missense | 3:178936091-178936091 |
| SA218         | 1659988 | 1574316 | c.3140A>G | p.H1047R | Substitution - Missense | 3:178952085-178952085 |
| CGA-AR-A2LM-0 | 2187811 | 2056089 | c.1035T>A | p.N345K  | Substitution - Missense | 3:178921553-178921553 |
| PD4122a       | 1331071 | 1241545 | c.1636C>A | p.Q546K  | Substitution - Missense | 3:178936094-178936094 |
| 1703805       | 1703805 | 1611914 | c.3140A>G | p.H1047R | Substitution - Missense | 3:178952085-178952085 |
| 1530061       | 1530061 | 1452433 | c.3140A>G | p.H1047R | Substitution - Missense | 3:178952085-178952085 |
| 1321136       | 1321136 | 1232023 | c.3140A>G | p.H1047R | Substitution - Missense | 3:178952085-178952085 |
| 1703838       | 1703838 | 1611947 | c.3140A>G | p.H1047R | Substitution - Missense | 3:178952085-178952085 |
| 1329609       | 1329609 | 1240094 | c.3140A>G | p.H1047R | Substitution - Missense | 3:178952085-178952085 |
| 1018381       | 1018381 | 935539  | c.3140A>G | p.H1047R | Substitution - Missense | 3:178952085-178952085 |
| 1018381       | 1018381 | 935539  | c.1634A>C | p.E545A  | Substitution - Missense | 3:178936092-178936092 |
| 904437        | 904437  | 821982  | c.2102A>C | p.H701P  | Substitution - Missense | 3:178938860-178938860 |
| 1720256       | 1720256 | 1627536 | c.?       | p.H1047R | Substitution - Missense |                       |
| 1018393       | 1018393 | 935551  | c.3140A>G | p.H1047R | Substitution - Missense | 3:178952085-178952085 |
| 1124253       | 1124253 | 1037296 | c.3140A>G | p.H1047R | Substitution - Missense | 3:178952085-178952085 |
| 1212743       | 1212743 | 1124610 | c.1633G>A | p.E545K  | Substitution - Missense | 3:178936091-178936091 |
| 1135878       | 1135878 | 1048442 | c.1633G>A | p.E545K  | Substitution - Missense | 3:178936091-178936091 |
| 1312223       | 1312223 | 1223132 | c.?       | p.E545K  | Substitution - Missense |                       |
| 1329719       | 1329719 | 1240204 | c.1633G>A | p.E545K  | Substitution - Missense | 3:178936091-178936091 |
| 1301929       | 1301929 | 1212980 | c.1624G>A | p.E542K  | Substitution - Missense | 3:178936082-178936082 |
| 1972516       | 1972516 | 1858765 | c.?       | p.H1047R | Substitution - Missense |                       |
| 1244926       | 1244926 | 1156632 | c.3140A>G | p.H1047R | Substitution - Missense | 3:178952085-178952085 |
| 1244944       | 1244944 | 1156650 | c.3140A>G | p.H1047R | Substitution - Missense | 3:178952085-178952085 |

|               |         |         |           |          |                         |                       |
|---------------|---------|---------|-----------|----------|-------------------------|-----------------------|
| 904458        | 904458  | 822003  | c.3140A>G | p.H1047R | Substitution - Missense | 3:178952085-178952085 |
| 2067948       | 2067948 | 1947741 | c.?       | p.H1047R | Substitution - Missense |                       |
| 1193522       | 1193522 | 1105418 | c.?       | p.H1047R | Substitution - Missense |                       |
| 1193498       | 1193498 | 1105394 | c.?       | p.H1047R | Substitution - Missense |                       |
| BC87          | 1281053 | 1192344 | c.?       | p.H1047R | Substitution - Missense |                       |
| 1193536       | 1193536 | 1105432 | c.?       | p.H1047R | Substitution - Missense |                       |
| CGA-A7-A26H-0 | 1899666 | 1788350 | c.3140A>G | p.H1047R | Substitution - Missense | 3:178952085-178952085 |
| CGA-D8-A1JU-0 | 1900064 | 1788748 | c.3140A>G | p.H1047R | Substitution - Missense | 3:178952085-178952085 |
| CGA-A8-A08T-0 | 1899709 | 1788393 | c.1633G>A | p.E545K  | Substitution - Missense | 3:178936091-178936091 |
| CGA-BH-A0BM-C | 1899896 | 1788580 | c.1035T>A | p.N345K  | Substitution - Missense | 3:178921553-178921553 |
| CGA-BH-A0DT-0 | 1899918 | 1788602 | c.1633G>A | p.E545K  | Substitution - Missense | 3:178936091-178936091 |
| 1972466       | 1972466 | 1858715 | c.?       | p.H1047R | Substitution - Missense |                       |
| 1670198       | 1670198 | 1583484 | c.1636C>A | p.Q546K  | Substitution - Missense | 3:178936094-178936094 |
| 1419262       | 1419262 | 1329303 | c.1633G>A | p.E545K  | Substitution - Missense | 3:178936091-178936091 |
| 1135845       | 1135845 | 1048409 | c.3140A>G | p.H1047R | Substitution - Missense | 3:178952085-178952085 |
| 1135831       | 1135831 | 1048395 | c.3140A>G | p.H1047R | Substitution - Missense | 3:178952085-178952085 |
| 1278873       | 1278873 | 1190169 | c.?       | p.Q546R  | Substitution - Missense |                       |
| 68            | 1860505 | 1751446 | c.3140A>G | p.H1047R | Substitution - Missense | 3:178952085-178952085 |
| 1703821       | 1703821 | 1611930 | c.3140A>G | p.H1047R | Substitution - Missense | 3:178952085-178952085 |
| 1703720       | 1703720 | 1611829 | c.1634A>C | p.E545A  | Substitution - Missense | 3:178936092-178936092 |
| 1698523       | 1698523 | 1606641 | c.1634A>C | p.E545A  | Substitution - Missense | 3:178936092-178936092 |
| 1443717       | 1443717 | 1367962 | c.?       | p.H1047R | Substitution - Missense |                       |
| 1670312       | 1670312 | 1583598 | c.3140A>G | p.H1047R | Substitution - Missense | 3:178952085-178952085 |
| 1972377       | 1972377 | 1858626 | c.?       | p.H1047R | Substitution - Missense |                       |
| 1193504       | 1193504 | 1105400 | c.?       | p.H1047R | Substitution - Missense |                       |
| MCF-7         | 904373  | 821918  | c.1633G>A | p.E545K  | Substitution - Missense | 3:178936091-178936091 |
| 1301951       | 1301951 | 1213002 | c.3140A>G | p.H1047R | Substitution - Missense | 3:178952085-178952085 |
| 1135829       | 1135829 | 1048393 | c.3140A>G | p.H1047R | Substitution - Missense | 3:178952085-178952085 |
| 1972158       | 1972158 | 1858407 | c.?       | p.E542K  | Substitution - Missense |                       |
| 1709223       | 1709223 | 1617129 | c.?       | p.H1047R | Substitution - Missense |                       |
| T-47D         | 894091  | 811859  | c.3140A>G | p.H1047R | Substitution - Missense | 3:178952085-178952085 |
| 1329902       | 1329902 | 1240387 | c.3140A>G | p.H1047R | Substitution - Missense | 3:178952085-178952085 |
| 1135796       | 1135796 | 1048360 | c.3140A>G | p.H1047R | Substitution - Missense | 3:178952085-178952085 |
| 1419267       | 1419267 | 1329308 | c.1624G>A | p.E542K  | Substitution - Missense | 3:178936082-178936082 |
| BT-483        | 1136343 | 1048907 | c.1624G>A | p.E542K  | Substitution - Missense | 3:178936082-178936082 |
| E40069        | 894121  | 811889  | c.3140A>T | p.H1047L | Substitution - Missense | 3:178952085-178952085 |
| 1972403       | 1972403 | 1858652 | c.?       | p.H1047R | Substitution - Missense |                       |
| 1124426       | 1124426 | 1037469 | c.3140A>T | p.H1047L | Substitution - Missense | 3:178952085-178952085 |
| 1692048       | 1692048 | 1600313 | c.1633G>A | p.E545K  | Substitution - Missense | 3:178936091-178936091 |
| 1443709       | 1443709 | 1367954 | c.?       | p.H1047R | Substitution - Missense |                       |
| 1297132       | 1297132 | 1208186 | c.?       | p.H1047R | Substitution - Missense |                       |
| 1244898       | 1244898 | 1156604 | c.3140A>G | p.H1047R | Substitution - Missense | 3:178952085-178952085 |
| 1675733       | 1675733 | 1588613 | c.1633G>A | p.E545K  | Substitution - Missense | 3:178936091-178936091 |

|               |         |         |                  |                |                         |                       |
|---------------|---------|---------|------------------|----------------|-------------------------|-----------------------|
| CGA-JL-A3YX-0 | 2187718 | 2055996 | c.2176G>A        | p.E726K        | Substitution - Missense | 3:178938934-178938934 |
| 1773304       | 1773304 | 1677544 | c.1633G>A        | p.E545K        | Substitution - Missense | 3:178936091-178936091 |
| CGA-JL-A3YX-0 | 2187718 | 2055996 | c.1624G>A        | p.E542K        | Substitution - Missense | 3:178936082-178936082 |
| 1972419       | 1972419 | 1858668 | c.?              | p.H1047R       | Substitution - Missense |                       |
| 1017963       | 1017963 | 935121  | c.3140A>G        | p.H1047R       | Substitution - Missense | 3:178952085-178952085 |
| 1657029       | 1657029 | 1571684 | c.3140A>G        | p.H1047R       | Substitution - Missense | 3:178952085-178952085 |
| 1882709       | 1882709 | 1772829 | c.3140A>G        | p.H1047R       | Substitution - Missense | 3:178952085-178952085 |
| 1443948       | 1443948 | 1368193 | c.?              | p.E542K        | Substitution - Missense |                       |
| OCUB-F        | 1289404 | 1200679 | c.3140A>G        | p.H1047R       | Substitution - Missense | 3:178952085-178952085 |
| PD4127a       | 1331081 | 1241555 | c.1633G>A        | p.E545K        | Substitution - Missense | 3:178936091-178936091 |
| 1972253       | 1972253 | 1858502 | c.?              | p.E545K        | Substitution - Missense |                       |
| 107424        | 1520481 | 1442856 | c.3140A>G        | p.H1047R       | Substitution - Missense | 3:178952085-178952085 |
| 1703819       | 1703819 | 1611928 | c.3140A>G        | p.H1047R       | Substitution - Missense | 3:178952085-178952085 |
| 1703843       | 1703843 | 1611952 | c.3140A>G        | p.H1047R       | Substitution - Missense | 3:178952085-178952085 |
| 1738920       | 1738920 | 1644751 | c.3073A>K        | p.T1025?       | Substitution - Missense | 3:178952018-178952018 |
| 1530107       | 1530107 | 1452479 | c.3140A>T        | p.H1047L       | Substitution - Missense | 3:178952085-178952085 |
| 1122692       | 1122692 | 1035736 | c.(1624_1633)G>A | p.(542_545)E>K | Substitution - Missense |                       |
| 1972510       | 1972510 | 1858759 | c.?              | p.H1047R       | Substitution - Missense |                       |
| 1703844       | 1703844 | 1611953 | c.3140A>G        | p.H1047R       | Substitution - Missense | 3:178952085-178952085 |
| 1419254       | 1419254 | 1329295 | c.3140A>G        | p.H1047R       | Substitution - Missense | 3:178952085-178952085 |
| 1135827       | 1135827 | 1048391 | c.3140A>G        | p.H1047R       | Substitution - Missense | 3:178952085-178952085 |
| 1329586       | 1329586 | 1240071 | c.3140A>G        | p.H1047R       | Substitution - Missense | 3:178952085-178952085 |
| 1134427       | 1134427 | 1047087 | c.3140A>G        | p.H1047R       | Substitution - Missense | 3:178952085-178952085 |
| 1018922       | 1018922 | 935945  | c.3140A>T        | p.H1047L       | Substitution - Missense | 3:178952085-178952085 |
| CGA-B6-A408-0 | 2187800 | 2056078 | c.1624G>A        | p.E542K        | Substitution - Missense | 3:178936082-178936082 |
| 1135909       | 1135909 | 1048473 | c.1252G>A        | p.E418K        | Substitution - Missense | 3:178927974-178927974 |
| 1864117       | 1864117 | 1754970 | c.?              | p.K111N        | Substitution - Missense |                       |
| 1864117       | 1864117 | 1754970 | c.?              | p.H1047R       | Substitution - Missense |                       |
| 1443734       | 1443734 | 1367979 | c.?              | p.H1047R       | Substitution - Missense |                       |
| 1670207       | 1670207 | 1583493 | c.3140A>G        | p.H1047R       | Substitution - Missense | 3:178952085-178952085 |
| 1720282       | 1720282 | 1627562 | c.?              | p.E545K        | Substitution - Missense |                       |
| 1124394       | 1124394 | 1037437 | c.1633G>A        | p.E545K        | Substitution - Missense | 3:178936091-178936091 |
| 1698880       | 1698880 | 1606998 | c.3140A>G        | p.H1047R       | Substitution - Missense | 3:178952085-178952085 |
| 1017188       | 1017188 | 934358  | c.3140A>G        | p.H1047R       | Substitution - Missense | 3:178952085-178952085 |
| 1244816       | 1244816 | 1156522 | c.1633G>A        | p.E545K        | Substitution - Missense | 3:178936091-178936091 |
| 1312224       | 1312224 | 1223133 | c.?              | p.E545K        | Substitution - Missense |                       |
| 1972483       | 1972483 | 1858732 | c.?              | p.H1047R       | Substitution - Missense |                       |
| 1972503       | 1972503 | 1858752 | c.?              | p.H1047R       | Substitution - Missense |                       |
| 1435078       | 1435078 | 1344436 | c.?              | p.H1047R       | Substitution - Missense |                       |
| MCF7          | 2165024 | 2033436 | c.?              | p.E545K        | Substitution - Missense |                       |
| 1703740       | 1703740 | 1611849 | c.1624G>A        | p.E542K        | Substitution - Missense | 3:178936082-178936082 |
| CGA-BH-A1FE-0 | 1899979 | 1788663 | c.331A>G         | p.K111E        | Substitution - Missense | 3:178916944-178916944 |
| CGA-AQ-A1H2-0 | 1899806 | 1788490 | c.3140A>G        | p.H1047R       | Substitution - Missense | 3:178952085-178952085 |

|               |         |         |                 |             |                         |                       |
|---------------|---------|---------|-----------------|-------------|-------------------------|-----------------------|
| 904473        | 904473  | 822018  | c.3140A>T       | p.H1047L    | Substitution - Missense | 3:178952085-178952085 |
| 901512        | 901512  | 819124  | c.3140A>G       | p.H1047R    | Substitution - Missense | 3:178952085-178952085 |
| 904419        | 904419  | 821964  | c.1624G>A       | p.E542K     | Substitution - Missense | 3:178936082-178936082 |
| UACC-893      | 1289420 | 1200695 | c.3140A>G       | p.H1047R    | Substitution - Missense | 3:178952085-178952085 |
| CGA-BH-A0BD-0 | 1779579 | 1683578 | c.3140A>G       | p.H1047R    | Substitution - Missense | 3:178952085-178952085 |
| CGA-BH-A0HI-0 | 1899941 | 1788625 | c.1633G>A       | p.E545K     | Substitution - Missense | 3:178936091-178936091 |
| CGA-E2-A154-0 | 1900127 | 1788811 | c.3140A>T       | p.H1047L    | Substitution - Missense | 3:178952085-178952085 |
| 1244803       | 1244803 | 1156509 | c.1624G>A       | p.E542K     | Substitution - Missense | 3:178936082-178936082 |
| 1703793       | 1703793 | 1611902 | c.3140A>G       | p.H1047R    | Substitution - Missense | 3:178952085-178952085 |
| 1530108       | 1530108 | 1452480 | c.3140A>G       | p.H1047R    | Substitution - Missense | 3:178952085-178952085 |
| 1739295       | 1739295 | 1645016 | c.?             | p.H1047Y    | Substitution - Missense |                       |
| 1329729       | 1329729 | 1240214 | c.1634A>G       | p.E545G     | Substitution - Missense | 3:178936092-178936092 |
| MDA-MB-453    | 1136356 | 1048920 | c.3140A>G       | p.H1047R    | Substitution - Missense | 3:178952085-178952085 |
| 1698879       | 1698879 | 1606997 | c.3140A>G       | p.H1047R    | Substitution - Missense | 3:178952085-178952085 |
| CGA-B6-A0IC-0 | 1899855 | 1788539 | c.1633G>A       | p.E545K     | Substitution - Missense | 3:178936091-178936091 |
| 1135841       | 1135841 | 1048405 | c.3140A>G       | p.H1047R    | Substitution - Missense | 3:178952085-178952085 |
| CGA-D8-A1JS-0 | 1900062 | 1788746 | c.3140A>G       | p.H1047R    | Substitution - Missense | 3:178952085-178952085 |
| CGA-D8-A1JS-0 | 1900062 | 1788746 | c.1030G>A       | p.V344M     | Substitution - Missense | 3:178921548-178921548 |
| CGA-BH-A18F-0 | 1899948 | 1788632 | c.3140A>G       | p.H1047R    | Substitution - Missense | 3:178952085-178952085 |
| CGA-BH-A18F-0 | 1899948 | 1788632 | c.1636C>A       | p.Q546K     | Substitution - Missense | 3:178936094-178936094 |
| CGA-A8-A095-0 | 1779384 | 1683383 | c.3140A>T       | p.H1047L    | Substitution - Missense | 3:178952085-178952085 |
| CGA-A7-A0D9-0 | 1899657 | 1788341 | c.1034A>C       | p.N345T     | Substitution - Missense | 3:178921552-178921552 |
| CGA-A8-A08Z-0 | 1899711 | 1788395 | c.3140A>G       | p.H1047R    | Substitution - Missense | 3:178952085-178952085 |
| CGA-BH-A0DE-0 | 1899910 | 1788594 | c.1634A>C       | p.E545A     | Substitution - Missense | 3:178936092-178936092 |
| 1692033       | 1692033 | 1600298 | c.1624G>A       | p.E542K     | Substitution - Missense | 3:178936082-178936082 |
| 1530088       | 1530088 | 1452460 | c.3189_3190insA | p.Q1064fs*7 | Insertion - Frameshift  | 3:178952134-178952135 |
| 1657031       | 1657031 | 1571686 | c.3140A>G       | p.H1047R    | Substitution - Missense | 3:178952085-178952085 |
| 1972142       | 1972142 | 1858391 | c.?             | p.E542K     | Substitution - Missense |                       |
| 1972446       | 1972446 | 1858695 | c.?             | p.H1047R    | Substitution - Missense |                       |
| 1244772       | 1244772 | 1156478 | c.1035T>A       | p.N345K     | Substitution - Missense | 3:178921553-178921553 |
| BT-474        | 1289383 | 1200658 | c.333G>C        | p.K111N     | Substitution - Missense | 3:178916946-178916946 |
| 1244792       | 1244792 | 1156498 | c.1624G>A       | p.E542K     | Substitution - Missense | 3:178936082-178936082 |
| 1703865       | 1703865 | 1611974 | c.3145G>C       | p.G1049R    | Substitution - Missense | 3:178952090-178952090 |
| 1419247       | 1419247 | 1329288 | c.3140A>G       | p.H1047R    | Substitution - Missense | 3:178952085-178952085 |
| 1972417       | 1972417 | 1858666 | c.?             | p.H1047R    | Substitution - Missense |                       |
| 1972533       | 1972533 | 1858782 | c.?             | p.H1047R    | Substitution - Missense |                       |
| 1972268       | 1972268 | 1858517 | c.?             | p.E545K     | Substitution - Missense |                       |
| 1738902       | 1738902 | 1644733 | c.1634A>C       | p.E545A     | Substitution - Missense | 3:178936092-178936092 |
| 1278877       | 1278877 | 1190173 | c.?             | p.H1047R    | Substitution - Missense |                       |
| 1312220       | 1312220 | 1223129 | c.?             | p.H1047R    | Substitution - Missense |                       |
| 1522789       | 1522789 | 1445161 | c.1634A>G       | p.E545G     | Substitution - Missense | 3:178936092-178936092 |
| 1972230       | 1972230 | 1858479 | c.?             | p.E545K     | Substitution - Missense |                       |
| 1329605       | 1329605 | 1240090 | c.3140A>G       | p.H1047R    | Substitution - Missense | 3:178952085-178952085 |

|               |         |         |         |                    |             |                         |                       |
|---------------|---------|---------|---------|--------------------|-------------|-------------------------|-----------------------|
|               | 1329746 | 1329746 | 1240231 | c.3140A>G          | p.H1047R    | Substitution - Missense | 3:178952085-178952085 |
|               | 1312217 | 1312217 | 1223126 | c.?                | p.H1047R    | Substitution - Missense |                       |
| MDA-MB-453    | 2165012 | 2033424 |         | c.?                | p.H1047R    | Substitution - Missense |                       |
|               | 1244934 | 1244934 | 1156640 | c.3140A>G          | p.H1047R    | Substitution - Missense | 3:178952085-178952085 |
|               | 1419234 | 1419234 | 1329275 | c.3140A>G          | p.H1047R    | Substitution - Missense | 3:178952085-178952085 |
|               | 1738905 | 1738905 | 1644736 | c.3140A>G          | p.H1047R    | Substitution - Missense | 3:178952085-178952085 |
|               | 1193562 | 1193562 | 1105458 | c.?                | p.E545K     | Substitution - Missense |                       |
|               | 1193528 | 1193528 | 1105424 | c.?                | p.H1047R    | Substitution - Missense |                       |
|               | 1134429 | 1134429 | 1047089 | c.1633G>A          | p.E545K     | Substitution - Missense | 3:178936091-178936091 |
|               | 1244905 | 1244905 | 1156611 | c.3140A>G          | p.H1047R    | Substitution - Missense | 3:178952085-178952085 |
|               | 1017901 | 1017901 | 935059  | c.3140A>G          | p.H1047R    | Substitution - Missense | 3:178952085-178952085 |
|               | E40066  | 894118  | 811886  | c.3140A>G          | p.H1047R    | Substitution - Missense | 3:178952085-178952085 |
|               | 1738890 | 1738890 | 1644721 | c.328G>A           | p.E110K     | Substitution - Missense | 3:178916941-178916941 |
|               | 1443616 | 1443616 | 1367861 | c.?                | p.H1047R    | Substitution - Missense |                       |
|               | 1703834 | 1703834 | 1611943 | c.3140A>G          | p.H1047R    | Substitution - Missense | 3:178952085-178952085 |
|               | 1244776 | 1244776 | 1156482 | c.1258T>C          | p.C420R     | Substitution - Missense | 3:178927980-178927980 |
|               | 1124390 | 1124390 | 1037433 | c.1624G>A          | p.E542K     | Substitution - Missense | 3:178936082-178936082 |
|               | 1522792 | 1522792 | 1445164 | c.3059C>T          | p.A1020V    | Substitution - Missense | 3:178952004-178952004 |
|               | 1692226 | 1692226 | 1600491 | c.?                | p.H1047R    | Substitution - Missense |                       |
|               | 1134430 | 1134430 | 1047090 | c.3140A>G          | p.H1047R    | Substitution - Missense | 3:178952085-178952085 |
|               | 1124261 | 1124261 | 1037304 | c.3140A>G          | p.H1047R    | Substitution - Missense | 3:178952085-178952085 |
|               | 1176658 | 1176658 | 1088655 | c.3140A>G          | p.H1047R    | Substitution - Missense | 3:178952085-178952085 |
|               | 1675760 | 1675760 | 1588626 | c.3140A>T          | p.H1047L    | Substitution - Missense | 3:178952085-178952085 |
|               | 1670302 | 1670302 | 1583588 | c.1624G>A          | p.E542K     | Substitution - Missense | 3:178936082-178936082 |
|               | 1017893 | 1017893 | 935051  | c.3140A>G          | p.H1047R    | Substitution - Missense | 3:178952085-178952085 |
|               | 1329895 | 1329895 | 1240380 | c.1633G>A          | p.E545K     | Substitution - Missense | 3:178936091-178936091 |
|               | 1738901 | 1738901 | 1644732 | c.1634A>C          | p.E545A     | Substitution - Missense | 3:178936092-178936092 |
|               | 1530106 | 1530106 | 1452478 | c.3204_3205insTTCT | p.*1069fs*3 | Insertion - Frameshift  | 3:178952149-178952150 |
|               | 1443701 | 1443701 | 1367946 | c.?                | p.H1047L    | Substitution - Missense |                       |
|               | 2042651 | 2042651 | 1923769 | c.1633G>C          | p.E545Q     | Substitution - Missense | 3:178936091-178936091 |
|               | 2042651 | 2042651 | 1923769 | c.3140A>G          | p.H1047R    | Substitution - Missense | 3:178952085-178952085 |
|               | 1698868 | 1698868 | 1606986 | c.3140A>G          | p.H1047R    | Substitution - Missense | 3:178952085-178952085 |
|               | 1698515 | 1698515 | 1606633 | c.3140A>G          | p.H1047R    | Substitution - Missense | 3:178952085-178952085 |
|               | 1698515 | 1698515 | 1606633 | c.1634A>C          | p.E545A     | Substitution - Missense | 3:178936092-178936092 |
|               | 1244773 | 1244773 | 1156479 | c.1035T>A          | p.N345K     | Substitution - Missense | 3:178921553-178921553 |
|               | 1443739 | 1443739 | 1367984 | c.?                | p.H1047R    | Substitution - Missense |                       |
| CGA-GM-A2D9-C | 2187740 | 2056018 |         | c.3140A>G          | p.H1047R    | Substitution - Missense | 3:178952085-178952085 |
|               | 1301976 | 1301976 | 1213027 | c.3140A>G          | p.H1047R    | Substitution - Missense | 3:178952085-178952085 |
| CGA-BH-A0DL-0 | 1899914 | 1788598 |         | c.3140A>G          | p.H1047R    | Substitution - Missense | 3:178952085-178952085 |
| CGA-GM-A2D9-C | 2187740 | 2056018 |         | c.1357G>A          | p.E453K     | Substitution - Missense | 3:178928079-178928079 |
|               | 1278871 | 1278871 | 1190167 | c.?                | p.E545K     | Substitution - Missense |                       |
|               | 1972301 | 1972301 | 1858550 | c.?                | p.E545K     | Substitution - Missense |                       |
| CGA-A8-A07E-0 | 1899679 | 1788363 |         | c.1035T>A          | p.N345K     | Substitution - Missense | 3:178921553-178921553 |

|               |         |         |                    |                  |                         |                         |                       |
|---------------|---------|---------|--------------------|------------------|-------------------------|-------------------------|-----------------------|
| CGA-A2-A0EN-0 | 1779288 | 1683287 | c.3194A>T          | p.H1065L         | Substitution - Missense | 3:178952139-178952139   |                       |
|               | 1972481 | 1858730 | c.?                | p.H1047R         | Substitution - Missense |                         |                       |
|               | BC120   | 1281086 | c.?                | p.H1047R         | Substitution - Missense |                         |                       |
|               | 1329906 | 1329906 | 1240391            | c.3140A>G        | p.H1047R                | Substitution - Missense | 3:178952085-178952085 |
|               | 107079  | 1520580 | 1442955            | c.3140A>G        | p.H1047R                | Substitution - Missense | 3:178952085-178952085 |
| CGA-A2-A0EN-0 | 1779288 | 1683287 | c.3140A>G          | p.H1047R         | Substitution - Missense | 3:178952085-178952085   |                       |
|               | 1738924 | 1738924 | 1644755            | c.3073A>K        | p.T1025?                | Substitution - Missense | 3:178952018-178952018 |
|               | 904464  | 904464  | 822009             | c.3140A>G        | p.H1047R                | Substitution - Missense | 3:178952085-178952085 |
|               | 904438  | 904438  | 821983             | c.2727C>G        | p.F909L                 | Substitution - Missense | 3:178947852-178947852 |
|               | 1018919 | 1018919 | 935942             | c.1633G>A        | p.E545K                 | Substitution - Missense | 3:178936091-178936091 |
|               | 1972375 | 1972375 | 1858624            | c.?              | p.H1047R                | Substitution - Missense |                       |
| CGA-B6-A0RG-0 | 1899860 | 1788544 | c.3140A>G          | p.H1047R         | Substitution - Missense | 3:178952085-178952085   |                       |
|               | 1176656 | 1176656 | 1088653            | c.3140A>G        | p.H1047R                | Substitution - Missense | 3:178952085-178952085 |
|               | 904421  | 904421  | 821966             | c.1633G>A        | p.E545K                 | Substitution - Missense | 3:178936091-178936091 |
|               | 1135871 | 1135871 | 1048435            | c.1633G>A        | p.E545K                 | Substitution - Missense | 3:178936091-178936091 |
|               | 1135832 | 1135832 | 1048396            | c.3140A>G        | p.H1047R                | Substitution - Missense | 3:178952085-178952085 |
|               | 1244885 | 1244885 | 1156591            | c.3140A>G        | p.H1047R                | Substitution - Missense | 3:178952085-178952085 |
|               | 1972441 | 1972441 | 1858690            | c.?              | p.H1047R                | Substitution - Missense |                       |
|               | 1972295 | 1972295 | 1858544            | c.?              | p.E545K                 | Substitution - Missense |                       |
|               | 1972487 | 1972487 | 1858736            | c.?              | p.H1047R                | Substitution - Missense |                       |
| CGA-A2-A04W-0 | 1899603 | 1788287 | c.3140A>G          | p.H1047R         | Substitution - Missense | 3:178952085-178952085   |                       |
|               | 1738915 | 1738915 | 1644746            | c.3140A>G        | p.H1047R                | Substitution - Missense | 3:178952085-178952085 |
|               | 1135836 | 1135836 | 1048400            | c.3140A>G        | p.H1047R                | Substitution - Missense | 3:178952085-178952085 |
|               | 1244811 | 1244811 | 1156517            | c.1633G>A        | p.E545K                 | Substitution - Missense | 3:178936091-178936091 |
|               | Case1   | 1943617 | 1830527            | c.1633G>A        | p.E545K                 | Substitution - Missense | 3:178936091-178936091 |
|               | 1972379 | 1972379 | 1858628            | c.?              | p.H1047R                | Substitution - Missense |                       |
|               | 1134432 | 1134432 | 1047092            | c.1633G>A        | p.E545K                 | Substitution - Missense | 3:178936091-178936091 |
|               | 1972356 | 1972356 | 1858605            | c.?              | p.H1047R                | Substitution - Missense |                       |
|               | 1329716 | 1329716 | 1240201            | c.1633G>A        | p.E545K                 | Substitution - Missense | 3:178936091-178936091 |
|               | 1676215 | 1676215 | 1588987            | c.?              | p.H1047R                | Substitution - Missense |                       |
|               | 1835034 | 1835034 | 1730066            | c.?              | p.H1047R                | Substitution - Missense |                       |
|               | 1435079 | 1435079 | 1344437            | c.?              | p.H1047R                | Substitution - Missense |                       |
|               | PD3985a | 1280808 | 1192099            | c.3140A>G        | p.H1047R                | Substitution - Missense | 3:178952085-178952085 |
|               | 1738899 | 1738899 | 1644730            | c.1633G>A        | p.E545K                 | Substitution - Missense | 3:178936091-178936091 |
|               | 1675737 | 1675737 | 1588615            | c.1633G>A        | p.E545K                 | Substitution - Missense | 3:178936091-178936091 |
| CGA-E2-A15P-0 | 1900148 | 1788832 | c.1624G>A          | p.E542K          | Substitution - Missense | 3:178936082-178936082   |                       |
| CGA-E2-A10C-0 | 1900109 | 1788793 | c.1633G>A          | p.E545K          | Substitution - Missense | 3:178936091-178936091   |                       |
| CGA-AN-A046-0 | 2187824 | 2056102 | c.3062A>G          | p.Y1021C         | Substitution - Missense | 3:178952007-178952007   |                       |
| CGA-E9-A1RH-0 | 1900211 | 1788895 | c.307_312delGAACCA | p.E103_P104delEP | Deletion - In frame     | 3:178916920-178916925   |                       |
|               | 904454  | 904454  | 821999             | c.3140A>G        | p.H1047R                | Substitution - Missense | 3:178952085-178952085 |
|               | 2067946 | 2067946 | 1947739            | c.?              | p.E545K                 | Substitution - Missense |                       |
|               | 1329606 | 1329606 | 1240091            | c.3140A>G        | p.H1047R                | Substitution - Missense | 3:178952085-178952085 |
|               | 1244827 | 1244827 | 1156533            | c.1633G>A        | p.E545K                 | Substitution - Missense | 3:178936091-178936091 |

|          |         |         |           |          |                         |                       |
|----------|---------|---------|-----------|----------|-------------------------|-----------------------|
| 1676195  | 1676195 | 1588967 | c.?       | p.E542K  | Substitution - Missense |                       |
| 1972390  | 1972390 | 1858639 | c.?       | p.H1047R | Substitution - Missense |                       |
| 1972266  | 1972266 | 1858515 | c.?       | p.E545K  | Substitution - Missense |                       |
| 1698853  | 1698853 | 1606971 | c.3140A>G | p.H1047R | Substitution - Missense | 3:178952085-178952085 |
| 1522787  | 1522787 | 1445159 | c.1637A>C | p.Q546P  | Substitution - Missense | 3:178936095-178936095 |
| 1244851  | 1244851 | 1156557 | c.1637A>G | p.Q546R  | Substitution - Missense | 3:178936095-178936095 |
| 1244780  | 1244780 | 1156486 | c.1258T>C | p.C420R  | Substitution - Missense | 3:178927980-178927980 |
| 1972204  | 1972204 | 1858453 | c.?       | p.E545K  | Substitution - Missense |                       |
| 1135866  | 1135866 | 1048430 | c.3145G>C | p.G1049R | Substitution - Missense | 3:178952090-178952090 |
| 1443906  | 1443906 | 1368151 | c.?       | p.H1047R | Substitution - Missense |                       |
| 1329828  | 1329828 | 1240313 | c.3140A>G | p.H1047R | Substitution - Missense | 3:178952085-178952085 |
| 1278876  | 1278876 | 1190172 | c.?       | p.H1047R | Substitution - Missense |                       |
| 1703742  | 1703742 | 1611851 | c.1624G>A | p.E542K  | Substitution - Missense | 3:178936082-178936082 |
| 1321156  | 1321156 | 1232043 | c.3145G>C | p.G1049R | Substitution - Missense | 3:178952090-178952090 |
| 1419251  | 1419251 | 1329292 | c.3140A>G | p.H1047R | Substitution - Missense | 3:178952085-178952085 |
| 1122684  | 1122684 | 1035728 | c.3140A>G | p.H1047R | Substitution - Missense | 3:178952085-178952085 |
| 1676182  | 1676182 | 1588954 | c.?       | p.E545K  | Substitution - Missense |                       |
| 1419241  | 1419241 | 1329282 | c.3140A>G | p.H1047R | Substitution - Missense | 3:178952085-178952085 |
| 1698837  | 1698837 | 1606955 | c.?       | p.E542K  | Substitution - Missense |                       |
| 1703757  | 1703757 | 1611866 | c.1633G>A | p.E545K  | Substitution - Missense | 3:178936091-178936091 |
| 1244856  | 1244856 | 1156562 | c.3140A>T | p.H1047L | Substitution - Missense | 3:178952085-178952085 |
| 2131993  | 2131993 | 2006056 | c.?       | p.H1047R | Substitution - Missense |                       |
| 1972193  | 1972193 | 1858442 | c.?       | p.E542K  | Substitution - Missense |                       |
| 1972256  | 1972256 | 1858505 | c.?       | p.E545K  | Substitution - Missense |                       |
| 1443716  | 1443716 | 1367961 | c.?       | p.H1047R | Substitution - Missense |                       |
| 1703722  | 1703722 | 1611831 | c.1636C>A | p.Q546K  | Substitution - Missense | 3:178936094-178936094 |
| 1321127  | 1321127 | 1232014 | c.1636C>A | p.Q546K  | Substitution - Missense | 3:178936094-178936094 |
| 1193510  | 1193510 | 1105406 | c.?       | p.H1047R | Substitution - Missense |                       |
| 1703788  | 1703788 | 1611897 | c.3140A>T | p.H1047L | Substitution - Missense | 3:178952085-178952085 |
| 1193537  | 1193537 | 1105433 | c.?       | p.H1047R | Substitution - Missense |                       |
| 1972492  | 1972492 | 1858741 | c.?       | p.H1047R | Substitution - Missense |                       |
| 1691710  | 1691710 | 1599976 | c.?       | p.H1047R | Substitution - Missense |                       |
| 1972525  | 1972525 | 1858774 | c.?       | p.H1047R | Substitution - Missense |                       |
| 2107707  | 2107707 | 1985568 | c.3140A>G | p.H1047R | Substitution - Missense | 3:178952085-178952085 |
| 1297124  | 1297124 | 1208178 | c.?       | p.H1047R | Substitution - Missense |                       |
| 1135848  | 1135848 | 1048412 | c.3140A>G | p.H1047R | Substitution - Missense | 3:178952085-178952085 |
| 904474   | 904474  | 822019  | c.3140A>T | p.H1047L | Substitution - Missense | 3:178952085-178952085 |
| 1244767  | 1244767 | 1156473 | c.1035T>A | p.N345K  | Substitution - Missense | 3:178921553-178921553 |
| 1670199  | 1670199 | 1583485 | c.1636C>A | p.Q546K  | Substitution - Missense | 3:178936094-178936094 |
| 1124595  | 1124595 | 1037638 | c.3140A>G | p.H1047R | Substitution - Missense | 3:178952085-178952085 |
| UACC-893 | 894092  | 811860  | c.3140A>G | p.H1047R | Substitution - Missense | 3:178952085-178952085 |
| E40049   | 894101  | 811869  | c.1624G>A | p.E542K  | Substitution - Missense | 3:178936082-178936082 |
| 1301943  | 1301943 | 1212994 | c.?       | p.?      | Substitution - Missense |                       |

|               |         |         |           |          |                         |                       |
|---------------|---------|---------|-----------|----------|-------------------------|-----------------------|
| 1972452       | 1972452 | 1858701 | c.?       | p.H1047R | Substitution - Missense |                       |
| 1193569       | 1193569 | 1105465 | c.?       | p.E545K  | Substitution - Missense |                       |
| 1522791       | 1522791 | 1445163 | c.3059C>T | p.A1020V | Substitution - Missense | 3:178952004-178952004 |
| E40064        | 894116  | 811884  | c.3140A>G | p.H1047R | Substitution - Missense | 3:178952085-178952085 |
| 1972225       | 1972225 | 1858474 | c.?       | p.E545K  | Substitution - Missense |                       |
| 1703790       | 1703790 | 1611899 | c.3140A>T | p.H1047L | Substitution - Missense | 3:178952085-178952085 |
| SUM-190       | 904391  | 821936  | c.3140A>G | p.H1047R | Substitution - Missense | 3:178952085-178952085 |
| CGA-A8-A07G-0 | 1899681 | 1788365 | c.3140A>G | p.H1047R | Substitution - Missense | 3:178952085-178952085 |
| CGA-A7-A26E-0 | 1899663 | 1788347 | c.1633G>A | p.E545K  | Substitution - Missense | 3:178936091-178936091 |
| 1329753       | 1329753 | 1240238 | c.3145G>C | p.G1049R | Substitution - Missense | 3:178952090-178952090 |
| 1972532       | 1972532 | 1858781 | c.?       | p.H1047R | Substitution - Missense |                       |
| 1972341       | 1972341 | 1858590 | c.?       | p.H1047L | Substitution - Missense |                       |
| 1703867       | 1703867 | 1611976 | c.3085G>C | p.D1029H | Substitution - Missense | 3:178952030-178952030 |
| 1703867       | 1703867 | 1611976 | c.3140A>T | p.H1047L | Substitution - Missense | 3:178952085-178952085 |
| 1135905       | 1135905 | 1048469 | c.1035T>A | p.N345K  | Substitution - Missense | 3:178921553-178921553 |
| 1018401       | 1018401 | 935559  | c.3140A>G | p.H1047R | Substitution - Missense | 3:178952085-178952085 |
| 1864116       | 1864116 | 1754969 | c.?       | p.K111N  | Substitution - Missense |                       |
| 1864116       | 1864116 | 1754969 | c.?       | p.H1047R | Substitution - Missense |                       |
| 1972392       | 1972392 | 1858641 | c.?       | p.H1047R | Substitution - Missense |                       |
| Sample_I      | 2053348 | 1933595 | c.?       | p.H1047R | Substitution - Missense |                       |
| 1703831       | 1703831 | 1611940 | c.3140A>G | p.H1047R | Substitution - Missense | 3:178952085-178952085 |
| 901506        | 901506  | 819118  | c.3140A>G | p.H1047R | Substitution - Missense | 3:178952085-178952085 |
| 1244929       | 1244929 | 1156635 | c.3140A>G | p.H1047R | Substitution - Missense | 3:178952085-178952085 |
| 1017890       | 1017890 | 935048  | c.1633G>A | p.E545K  | Substitution - Missense | 3:178936091-178936091 |
| Sample_I      | 2053348 | 1933595 | c.?       | p.E545K  | Substitution - Missense |                       |
| 1017837       | 1017837 | 934995  | c.1624G>A | p.E542K  | Substitution - Missense | 3:178936082-178936082 |
| 1972362       | 1972362 | 1858611 | c.?       | p.H1047R | Substitution - Missense |                       |
| 1972423       | 1972423 | 1858672 | c.?       | p.H1047R | Substitution - Missense |                       |
| 1435087       | 1435087 | 1344445 | c.?       | p.E542K  | Substitution - Missense |                       |
| 1321152       | 1321152 | 1232039 | c.3140A>G | p.H1047R | Substitution - Missense | 3:178952085-178952085 |
| 1419243       | 1419243 | 1329284 | c.3140A>G | p.H1047R | Substitution - Missense | 3:178952085-178952085 |
| 1972229       | 1972229 | 1858478 | c.?       | p.E545K  | Substitution - Missense |                       |
| 1018913       | 1018913 | 935936  | c.1624G>A | p.E542K  | Substitution - Missense | 3:178936082-178936082 |
| T-47D         | 2165027 | 2033439 | c.?       | p.H1047R | Substitution - Missense |                       |
| 1124602       | 1124602 | 1037645 | c.3140A>G | p.H1047R | Substitution - Missense | 3:178952085-178952085 |
| CGA-AO-A0JF-0 | 1899782 | 1788466 | c.1633G>A | p.E545K  | Substitution - Missense | 3:178936091-178936091 |
| CGA-AO-A0JF-0 | 1899782 | 1788466 | c.1357G>A | p.E453K  | Substitution - Missense | 3:178928079-178928079 |
| KPL-1         | 2165023 | 2033435 | c.?       | p.E545K  | Substitution - Missense |                       |
| 1972396       | 1972396 | 1858645 | c.?       | p.H1047R | Substitution - Missense |                       |
| 1135872       | 1135872 | 1048436 | c.1633G>A | p.E545K  | Substitution - Missense | 3:178936091-178936091 |
| 1443964       | 1443964 | 1368209 | c.?       | p.H1047R | Substitution - Missense |                       |
| 1329908       | 1329908 | 1240393 | c.3140A>G | p.H1047R | Substitution - Missense | 3:178952085-178952085 |
| 1972353       | 1972353 | 1858602 | c.?       | p.H1047R | Substitution - Missense |                       |



|               |         |         |           |          |                         |                       |
|---------------|---------|---------|-----------|----------|-------------------------|-----------------------|
| 1972146       | 1972146 | 1858395 | c.?       | p.E542K  | Substitution - Missense |                       |
| 1244937       | 1244937 | 1156643 | c.3140A>G | p.H1047R | Substitution - Missense | 3:178952085-178952085 |
| 1321138       | 1321138 | 1232025 | c.3140A>G | p.H1047R | Substitution - Missense | 3:178952085-178952085 |
| 1972275       | 1972275 | 1858524 | c.?       | p.E545K  | Substitution - Missense |                       |
| 1212748       | 1212748 | 1124615 | c.1624G>A | p.E542K  | Substitution - Missense | 3:178936082-178936082 |
| 904459        | 904459  | 822004  | c.3140A>G | p.H1047R | Substitution - Missense | 3:178952085-178952085 |
| CGA-E9-A1N5-0 | 1900185 | 1788869 | c.1624G>A | p.E542K  | Substitution - Missense | 3:178936082-178936082 |
| CGA-A2-A3KC-0 | 2187891 | 2056169 | c.3140A>G | p.H1047R | Substitution - Missense | 3:178952085-178952085 |
| CGA-B6-A0X7-0 | 1899873 | 1788557 | c.3140A>G | p.H1047R | Substitution - Missense | 3:178952085-178952085 |
| CGA-AO-A0JE-0 | 1899781 | 1788465 | c.1624G>A | p.E542K  | Substitution - Missense | 3:178936082-178936082 |
| 901502        | 901502  | 819114  | c.1633G>A | p.E545K  | Substitution - Missense | 3:178936091-178936091 |
| 1193548       | 1193548 | 1105444 | c.?       | p.H1047Y | Substitution - Missense |                       |
| 1329718       | 1329718 | 1240203 | c.1633G>A | p.E545K  | Substitution - Missense | 3:178936091-178936091 |
| 1670306       | 1670306 | 1583592 | c.3140A>G | p.H1047R | Substitution - Missense | 3:178952085-178952085 |
| 1882688       | 1882688 | 1772808 | c.3140A>T | p.H1047L | Substitution - Missense | 3:178952085-178952085 |
| UACC-893      | 2165015 | 2033427 | c.?       | p.H1047R | Substitution - Missense |                       |
| BSY-1         | 1436029 | 1345308 | c.?       | p.H1047R | Substitution - Missense |                       |
| 1435083       | 1435083 | 1344441 | c.?       | p.E545K  | Substitution - Missense |                       |
| 1135891       | 1135891 | 1048455 | c.1633G>A | p.E545K  | Substitution - Missense | 3:178936091-178936091 |
| 1419248       | 1419248 | 1329289 | c.3140A>G | p.H1047R | Substitution - Missense | 3:178952085-178952085 |
| 1738897       | 1738897 | 1644728 | c.1633G>A | p.E545K  | Substitution - Missense | 3:178936091-178936091 |
| 1443746       | 1443746 | 1367991 | c.?       | p.H1047R | Substitution - Missense |                       |
| 2131994       | 2131994 | 2006057 | c.?       | p.H1047R | Substitution - Missense |                       |
| 1972304       | 1972304 | 1858553 | c.?       | p.E545K  | Substitution - Missense |                       |
| 1698854       | 1698854 | 1606972 | c.3140A>G | p.H1047R | Substitution - Missense | 3:178952085-178952085 |
| 1017838       | 1017838 | 934996  | c.1624G>A | p.E542K  | Substitution - Missense | 3:178936082-178936082 |
| 1193558       | 1193558 | 1105454 | c.?       | p.E545K  | Substitution - Missense |                       |
| 1972164       | 1972164 | 1858413 | c.?       | p.E542K  | Substitution - Missense |                       |
| 1703866       | 1703866 | 1611975 | c.3155C>A | p.T1052K | Substitution - Missense | 3:178952100-178952100 |
| 1972471       | 1972471 | 1858720 | c.?       | p.H1047R | Substitution - Missense |                       |
| 1703721       | 1703721 | 1611830 | c.1636C>A | p.Q546K  | Substitution - Missense | 3:178936094-178936094 |
| 1972366       | 1972366 | 1858615 | c.?       | p.H1047R | Substitution - Missense |                       |
| 1882681       | 1882681 | 1772801 | c.1633G>A | p.E545K  | Substitution - Missense | 3:178936091-178936091 |
| 1972435       | 1972435 | 1858684 | c.?       | p.H1047R | Substitution - Missense |                       |
| 1443899       | 1443899 | 1368144 | c.?       | p.H1047R | Substitution - Missense |                       |
| E39847        | 894058  | 811826  | c.3140A>G | p.H1047R | Substitution - Missense | 3:178952085-178952085 |
| 1244874       | 1244874 | 1156580 | c.3140A>G | p.H1047R | Substitution - Missense | 3:178952085-178952085 |
| 1297168       | 1297168 | 1208222 | c.?       | p.H701P  | Substitution - Missense |                       |
| 1297168       | 1297168 | 1208222 | c.?       | p.E707K  | Substitution - Missense |                       |
| 1297168       | 1297168 | 1208222 | c.?       | p.L719V  | Substitution - Missense |                       |
| 105532        | 1520447 | 1442822 | c.3140A>G | p.H1047R | Substitution - Missense | 3:178952085-178952085 |
| 1244822       | 1244822 | 1156528 | c.1633G>A | p.E545K  | Substitution - Missense | 3:178936091-178936091 |
| 1244844       | 1244844 | 1156550 | c.1633G>C | p.E545Q  | Substitution - Missense | 3:178936091-178936091 |

|               |         |         |                  |          |                              |                       |
|---------------|---------|---------|------------------|----------|------------------------------|-----------------------|
| 1329724       | 1329724 | 1240209 | c.1633G>A        | p.E545K  | Substitution - Missense      | 3:178936091-178936091 |
| BT-20         | 904350  | 821895  | c.1616C>G        | p.P539R  | Substitution - Missense      | 3:178936074-178936074 |
| 1691734       | 1691734 | 1600000 | c.?              | p.H1047R | Substitution - Missense      |                       |
| BT-20         | 904350  | 821895  | c.3140A>G        | p.H1047R | Substitution - Missense      | 3:178952085-178952085 |
| 1698514       | 1698514 | 1606632 | c.1634A>C        | p.E545A  | Substitution - Missense      | 3:178936092-178936092 |
| CGA-A8-A09Q-0 | 1899727 | 1788411 | c.2265A>G        | p.L755L  | Substitution - coding silent | 3:178941946-178941946 |
| 1244899       | 1244899 | 1156605 | c.3140A>G        | p.H1047R | Substitution - Missense      | 3:178952085-178952085 |
| CGA-BH-A0H3-0 | 1899934 | 1788618 | c.1035T>A        | p.N345K  | Substitution - Missense      | 3:178921553-178921553 |
| 1972336       | 1972336 | 1858585 | c.?              | p.H1047L | Substitution - Missense      |                       |
| 1244800       | 1244800 | 1156506 | c.1624G>A        | p.E542K  | Substitution - Missense      | 3:178936082-178936082 |
| 1193532       | 1193532 | 1105428 | c.?              | p.H1047R | Substitution - Missense      |                       |
| 1676175       | 1676175 | 1588947 | c.?              | p.H1047R | Substitution - Missense      |                       |
| 1135902       | 1135902 | 1048466 | c.1624G>A        | p.E542K  | Substitution - Missense      | 3:178936082-178936082 |
| 1972480       | 1972480 | 1858729 | c.?              | p.H1047R | Substitution - Missense      |                       |
| 1657034       | 1657034 | 1571689 | c.3140A>G        | p.H1047R | Substitution - Missense      | 3:178952085-178952085 |
| CGA-A2-A0CW-C | 1899613 | 1788297 | c.3145G>C        | p.G1049R | Substitution - Missense      | 3:178952090-178952090 |
| 1720338       | 1720338 | 1627618 | c.?              | p.E545K  | Substitution - Missense      |                       |
| 1720257       | 1720257 | 1627537 | c.?              | p.H1047R | Substitution - Missense      |                       |
| 1972189       | 1972189 | 1858438 | c.?              | p.E542K  | Substitution - Missense      |                       |
| 1972311       | 1972311 | 1858560 | c.?              | p.H1047L | Substitution - Missense      |                       |
| 1244832       | 1244832 | 1156538 | c.1633G>A        | p.E545K  | Substitution - Missense      | 3:178936091-178936091 |
| 1443698       | 1443698 | 1367943 | c.?              | p.E542K  | Substitution - Missense      |                       |
| 1443638       | 1443638 | 1367883 | c.?              | p.H1047R | Substitution - Missense      |                       |
| 904461        | 904461  | 822006  | c.3140A>G        | p.H1047R | Substitution - Missense      | 3:178952085-178952085 |
| 1302099       | 1302099 | 1213150 | c.3140A>G        | p.H1047R | Substitution - Missense      | 3:178952085-178952085 |
| CGA-GM-A3NY-C | 2187726 | 2056004 | c.1633G>A        | p.E545K  | Substitution - Missense      | 3:178936091-178936091 |
| 1691703       | 1691703 | 1599969 | c.?              | p.H1047R | Substitution - Missense      |                       |
| 1972215       | 1972215 | 1858464 | c.?              | p.E545K  | Substitution - Missense      |                       |
| 1709247       | 1709247 | 1617153 | c.?              | p.E545A  | Substitution - Missense      |                       |
| 16            | 1971265 | 1857514 | c.1624_1625GA>AG | p.E542R  | Substitution - Missense      | 3:178936082-178936083 |
| 1212754       | 1212754 | 1124621 | c.3140A>G        | p.H1047R | Substitution - Missense      | 3:178952085-178952085 |
| CGA-D8-A1XY-0 | 1900085 | 1788769 | c.1633G>A        | p.E545K  | Substitution - Missense      | 3:178936091-178936091 |
| 1124596       | 1124596 | 1037639 | c.3140A>G        | p.H1047R | Substitution - Missense      | 3:178952085-178952085 |
| 1419268       | 1419268 | 1329309 | c.1624G>A        | p.E542K  | Substitution - Missense      | 3:178936082-178936082 |
| 1443728       | 1443728 | 1367973 | c.?              | p.H1047R | Substitution - Missense      |                       |
| 1698531       | 1698531 | 1606649 | c.1624G>A        | p.E542K  | Substitution - Missense      | 3:178936082-178936082 |
| 1443740       | 1443740 | 1367985 | c.?              | p.H1047R | Substitution - Missense      |                       |
| 1193500       | 1193500 | 1105396 | c.?              | p.H1047R | Substitution - Missense      |                       |
| 1297133       | 1297133 | 1208187 | c.?              | p.H1047R | Substitution - Missense      |                       |
| 1972151       | 1972151 | 1858400 | c.?              | p.E542K  | Substitution - Missense      |                       |
| 1703829       | 1703829 | 1611938 | c.3140A>G        | p.H1047R | Substitution - Missense      | 3:178952085-178952085 |
| 1329749       | 1329749 | 1240234 | c.3140A>T        | p.H1047L | Substitution - Missense      | 3:178952085-178952085 |
| 1135900       | 1135900 | 1048464 | c.1624G>A        | p.E542K  | Substitution - Missense      | 3:178936082-178936082 |

|               |         |         |                       |               |                            |                       |
|---------------|---------|---------|-----------------------|---------------|----------------------------|-----------------------|
| CGA-A2-A25D-0 | 1899649 | 1788333 | c.325_327delGAA       | p.E109del     | Deletion - In frame        | 3:178916938-178916940 |
|               | 1212763 | 1124630 | c.3140A>G             | p.H1047R      | Substitution - Missense    | 3:178952085-178952085 |
|               | 1244867 | 1156573 | c.3140A>G             | p.H1047R      | Substitution - Missense    | 3:178952085-178952085 |
|               | PD4120a | 1241541 | c.3140A>G             | p.H1047R      | Substitution - Missense    | 3:178952085-178952085 |
|               | PD4120a | 1241541 | c.333G>C              | p.K111N       | Substitution - Missense    | 3:178916946-178916946 |
| CGA-E2-A1L6-0 | 1900171 | 1788855 | c.3140A>G             | p.H1047R      | Substitution - Missense    | 3:178952085-178952085 |
|               | 1017843 | 935001  | c.1633G>A             | p.E545K       | Substitution - Missense    | 3:178936091-178936091 |
|               | 1193545 | 1105441 | c.?                   | p.H1047R      | Substitution - Missense    |                       |
|               | 1676183 | 1588955 | c.?                   | p.H1047R      | Substitution - Missense    |                       |
|               | 1972139 | 1858388 | c.?                   | p.E542K       | Substitution - Missense    |                       |
|               | 1017841 | 934999  | c.1624G>A             | p.E542K       | Substitution - Missense    | 3:178936082-178936082 |
|               | 1124393 | 1037436 | c.1624G>A             | p.E542K       | Substitution - Missense    | 3:178936082-178936082 |
| HF-11457      | 1507766 | 1430632 | c.3140A>G             | p.H1047R      | Substitution - Missense    | 3:178952085-178952085 |
|               | 89061   | 1442879 | c.3140A>G             | p.H1047R      | Substitution - Missense    | 3:178952085-178952085 |
|               | 1244853 | 1156559 | c.3140A>T             | p.H1047L      | Substitution - Missense    | 3:178952085-178952085 |
| CGA-B6-AOWY-C | 1899870 | 1788554 | c.327_335delAGAAAAGAT | p.E109_I112>D | Complex - deletion inframe | 3:178916940-178916948 |
|               | 2067947 | 1947740 | c.?                   | p.M1043I      | Substitution - Missense    |                       |
|               | 1443715 | 1367960 | c.?                   | p.H1047R      | Substitution - Missense    |                       |
|               | 1301931 | 1212982 | c.1633G>A             | p.E545K       | Substitution - Missense    | 3:178936091-178936091 |
|               | 1301931 | 1212982 | c.3140A>G             | p.H1047R      | Substitution - Missense    | 3:178952085-178952085 |
|               | 1675758 | 1588625 | c.3140A>G             | p.H1047R      | Substitution - Missense    | 3:178952085-178952085 |
|               | 1017854 | 935012  | c.3140A>G             | p.H1047R      | Substitution - Missense    | 3:178952085-178952085 |
|               | BT-483  | 2033429 | c.?                   | p.E542K       | Substitution - Missense    |                       |
|               | 1972388 | 1858637 | c.?                   | p.H1047R      | Substitution - Missense    |                       |
|               | 1124424 | 1037467 | c.3140A>G             | p.H1047R      | Substitution - Missense    | 3:178952085-178952085 |
|               | 1321144 | 1232031 | c.3140A>G             | p.H1047R      | Substitution - Missense    | 3:178952085-178952085 |
|               | 1135864 | 1048428 | c.3139C>T             | p.H1047Y      | Substitution - Missense    | 3:178952084-178952084 |
| SUM159PT      | 1136380 | 1048944 | c.3140A>T             | p.H1047L      | Substitution - Missense    | 3:178952085-178952085 |
|               | 1443699 | 1367944 | c.?                   | p.E542K       | Substitution - Missense    |                       |
| MDA-MB-361    | 1348961 | 1259212 | c.?                   | p.E545K       | Substitution - Missense    |                       |
|               | 1193560 | 1105456 | c.?                   | p.E545K       | Substitution - Missense    |                       |
|               | 2053356 | 1933602 | c.?                   | p.E545K       | Substitution - Missense    |                       |
|               | 2053356 | 1933602 | c.?                   | p.H1047R      | Substitution - Missense    |                       |
|               | 1703734 | 1611843 | c.1624G>A             | p.E542K       | Substitution - Missense    | 3:178936082-178936082 |
|               | 1135802 | 1048366 | c.3140A>G             | p.H1047R      | Substitution - Missense    | 3:178952085-178952085 |
|               | 1972140 | 1858389 | c.?                   | p.E542K       | Substitution - Missense    |                       |
|               | 1972330 | 1858579 | c.?                   | p.H1047L      | Substitution - Missense    |                       |
|               | 1443627 | 1367872 | c.?                   | p.H1047R      | Substitution - Missense    |                       |
|               | 1244873 | 1156579 | c.3140A>G             | p.H1047R      | Substitution - Missense    | 3:178952085-178952085 |
|               | 904423  | 821968  | c.1633G>A             | p.E545K       | Substitution - Missense    | 3:178936091-178936091 |
|               | 1135821 | 1048385 | c.3140A>G             | p.H1047R      | Substitution - Missense    | 3:178952085-178952085 |
|               | 1698529 | 1606647 | c.3140A>G             | p.H1047R      | Substitution - Missense    | 3:178952085-178952085 |
|               | 1134436 | 1047096 | c.3140A>G             | p.H1047R      | Substitution - Missense    | 3:178952085-178952085 |

|               |         |         |           |          |                         |                       |
|---------------|---------|---------|-----------|----------|-------------------------|-----------------------|
| 1443949       | 1443949 | 1368194 | c.?       | p.E542K  | Substitution - Missense |                       |
| 1443631       | 1443631 | 1367876 | c.?       | p.H1047R | Substitution - Missense |                       |
| 1972331       | 1972331 | 1858580 | c.?       | p.H1047L | Substitution - Missense |                       |
| 1017892       | 1017892 | 935050  | c.3140A>G | p.H1047R | Substitution - Missense | 3:178952085-178952085 |
| 1972271       | 1972271 | 1858520 | c.?       | p.E545K  | Substitution - Missense |                       |
| BC141         | 1281107 | 1192398 | c.?       | p.H1047L | Substitution - Missense |                       |
| 1419246       | 1419246 | 1329287 | c.3140A>G | p.H1047R | Substitution - Missense | 3:178952085-178952085 |
| 1419264       | 1419264 | 1329305 | c.1633G>A | p.E545K  | Substitution - Missense | 3:178936091-178936091 |
| 1443644       | 1443644 | 1367889 | c.?       | p.H1047R | Substitution - Missense |                       |
| 1329730       | 1329730 | 1240215 | c.3140A>G | p.H1047R | Substitution - Missense | 3:178952085-178952085 |
| 1972233       | 1972233 | 1858482 | c.?       | p.E545K  | Substitution - Missense |                       |
| CGA-A2-A0EM-0 | 1899618 | 1788302 | c.3140A>T | p.H1047L | Substitution - Missense | 3:178952085-178952085 |
| CGA-BH-A0HF-0 | 2187797 | 2056075 | c.1624G>A | p.E542K  | Substitution - Missense | 3:178936082-178936082 |
| CGA-EW-A1J2-0 | 1900236 | 1788920 | c.3140A>G | p.H1047R | Substitution - Missense | 3:178952085-178952085 |
| 1135874       | 1135874 | 1048438 | c.1633G>A | p.E545K  | Substitution - Missense | 3:178936091-178936091 |
| 1124408       | 1124408 | 1037451 | c.3140A>G | p.H1047R | Substitution - Missense | 3:178952085-178952085 |
| CGA-D8-A1JF-0 | 1900052 | 1788736 | c.1193G>A | p.R398H  | Substitution - Missense | 3:178927430-178927430 |
| 1301939       | 1301939 | 1212990 | c.1633G>A | p.E545K  | Substitution - Missense | 3:178936091-178936091 |
| 1244823       | 1244823 | 1156529 | c.1633G>A | p.E545K  | Substitution - Missense | 3:178936091-178936091 |
| 1530099       | 1530099 | 1452471 | c.1633G>A | p.E545K  | Substitution - Missense | 3:178936091-178936091 |
| CGA-D8-A1JF-0 | 1900052 | 1788736 | c.1633G>A | p.E545K  | Substitution - Missense | 3:178936091-178936091 |
| 1244768       | 1244768 | 1156474 | c.1035T>A | p.N345K  | Substitution - Missense | 3:178921553-178921553 |
| 1657049       | 1657049 | 1571704 | c.1635G>C | p.E545D  | Substitution - Missense | 3:178936093-178936093 |
| 1244911       | 1244911 | 1156617 | c.3140A>G | p.H1047R | Substitution - Missense | 3:178952085-178952085 |
| 904420        | 904420  | 821965  | c.1633G>A | p.E545K  | Substitution - Missense | 3:178936091-178936091 |
| 1972490       | 1972490 | 1858739 | c.?       | p.H1047R | Substitution - Missense |                       |
| 1972448       | 1972448 | 1858697 | c.?       | p.H1047R | Substitution - Missense |                       |
| 1703833       | 1703833 | 1611942 | c.3140A>G | p.H1047R | Substitution - Missense | 3:178952085-178952085 |
| MCF-7         | 1046936 | 963167  | c.1633G>A | p.E545K  | Substitution - Missense | 3:178936091-178936091 |
| 1425159       | 1425159 | 1335187 | c.?       | p.H1047R | Substitution - Missense |                       |
| 1972334       | 1972334 | 1858583 | c.?       | p.H1047L | Substitution - Missense |                       |
| 904448        | 904448  | 821993  | c.3140A>G | p.H1047R | Substitution - Missense | 3:178952085-178952085 |
| 1212762       | 1212762 | 1124629 | c.3140A>G | p.H1047R | Substitution - Missense | 3:178952085-178952085 |
| 1435086       | 1435086 | 1344444 | c.?       | p.E545K  | Substitution - Missense |                       |
| 1972476       | 1972476 | 1858725 | c.?       | p.H1047R | Substitution - Missense |                       |
| 1134437       | 1134437 | 1047097 | c.3140A>G | p.H1047R | Substitution - Missense | 3:178952085-178952085 |
| 2107729       | 2107729 | 1985590 | c.1258T>C | p.C420R  | Substitution - Missense | 3:178927980-178927980 |
| PD4094a       | 1312952 | 1223861 | c.3145G>C | p.G1049R | Substitution - Missense | 3:178952090-178952090 |
| 1329814       | 1329814 | 1240299 | c.1624G>A | p.E542K  | Substitution - Missense | 3:178936082-178936082 |
| 1435081       | 1435081 | 1344439 | c.?       | p.H1047R | Substitution - Missense |                       |
| 1972318       | 1972318 | 1858567 | c.?       | p.H1047L | Substitution - Missense |                       |
| 1698871       | 1698871 | 1606989 | c.3140A>G | p.H1047R | Substitution - Missense | 3:178952085-178952085 |
| 1670317       | 1670317 | 1583603 | c.3140A>G | p.H1047R | Substitution - Missense | 3:178952085-178952085 |

|               |         |         |                 |            |                              |                       |
|---------------|---------|---------|-----------------|------------|------------------------------|-----------------------|
| 2107712       | 2107712 | 1985573 | c.3140A>G       | p.H1047R   | Substitution - Missense      | 3:178952085-178952085 |
| 1972549       | 1972549 | 1858798 | c.?             | p.H1047R   | Substitution - Missense      |                       |
| 1972548       | 1972548 | 1858797 | c.?             | p.H1047R   | Substitution - Missense      |                       |
| 1321145       | 1321145 | 1232032 | c.3140A>G       | p.H1047R   | Substitution - Missense      | 3:178952085-178952085 |
| 2047124       | 2047124 | 1927406 | c.?             | p.H1047R   | Substitution - Missense      |                       |
| 901503        | 901503  | 819115  | c.3140A>G       | p.H1047R   | Substitution - Missense      | 3:178952085-178952085 |
| 901503        | 901503  | 819115  | c.1633G>A       | p.E545K    | Substitution - Missense      | 3:178936091-178936091 |
| CGA-AQ-A0Y5-0 | 1899805 | 1788489 | c.1357G>A       | p.E453K    | Substitution - Missense      | 3:178928079-178928079 |
| 1972219       | 1972219 | 1858468 | c.?             | p.E545K    | Substitution - Missense      |                       |
| 1443960       | 1443960 | 1368205 | c.?             | p.H1047R   | Substitution - Missense      |                       |
| 1882736       | 1882736 | 1772856 | c.3140A>G       | p.H1047R   | Substitution - Missense      | 3:178952085-178952085 |
| 1419242       | 1419242 | 1329283 | c.3140A>G       | p.H1047R   | Substitution - Missense      | 3:178952085-178952085 |
| 904410        | 904410  | 821955  | c.1357G>A       | p.E453K    | Substitution - Missense      | 3:178928079-178928079 |
| CGA-A7-A0CJ-0 | 1899656 | 1788340 | c.1637A>G       | p.Q546R    | Substitution - Missense      | 3:178936095-178936095 |
| 1301973       | 1301973 | 1213024 | c.3140A>G       | p.H1047R   | Substitution - Missense      | 3:178952085-178952085 |
| 1670215       | 1670215 | 1583501 | c.3140A>G       | p.H1047R   | Substitution - Missense      | 3:178952085-178952085 |
| 1124395       | 1124395 | 1037438 | c.1633G>A       | p.E545K    | Substitution - Missense      | 3:178936091-178936091 |
| 1530101       | 1530101 | 1452473 | c.3140A>G       | p.H1047R   | Substitution - Missense      | 3:178952085-178952085 |
| 1657040       | 1657040 | 1571695 | c.3140A>G       | p.H1047R   | Substitution - Missense      | 3:178952085-178952085 |
| 1419253       | 1419253 | 1329294 | c.3140A>G       | p.H1047R   | Substitution - Missense      | 3:178952085-178952085 |
| 1297129       | 1297129 | 1208183 | c.?             | p.H1047R   | Substitution - Missense      |                       |
| 1244918       | 1244918 | 1156624 | c.3140A>G       | p.H1047R   | Substitution - Missense      | 3:178952085-178952085 |
| 1124402       | 1124402 | 1037445 | c.1633G>A       | p.E545K    | Substitution - Missense      | 3:178936091-178936091 |
| 1018909       | 1018909 | 935932  | c.3075C>T       | p.T1025T   | Substitution - coding silent | 3:178952020-178952020 |
| 1193508       | 1193508 | 1105404 | c.?             | p.H1047R   | Substitution - Missense      |                       |
| SUM102PT      | 1046939 | 963170  | c.3140A>G       | p.H1047R   | Substitution - Missense      | 3:178952085-178952085 |
| 1301941       | 1301941 | 1212992 | c.1633G>A       | p.E545K    | Substitution - Missense      | 3:178936091-178936091 |
| CGA-A2-A25C-0 | 1899648 | 1788332 | c.3140A>G       | p.H1047R   | Substitution - Missense      | 3:178952085-178952085 |
| CGA-AR-A24O-0 | 1899837 | 1788521 | c.3140A>T       | p.H1047L   | Substitution - Missense      | 3:178952085-178952085 |
| CGA-AO-A126-0 | 1899788 | 1788472 | c.1633G>A       | p.E545K    | Substitution - Missense      | 3:178936091-178936091 |
| CGA-A2-A0EO-0 | 1899619 | 1788303 | c.1624G>A       | p.E542K    | Substitution - Missense      | 3:178936082-178936082 |
| CGA-D8-A27K-0 | 1900095 | 1788779 | c.331_333delAAG | p.K111delK | Deletion - In frame          | 3:178916944-178916946 |
| 1675741       | 1675741 | 1588617 | c.3140A>G       | p.H1047R   | Substitution - Missense      | 3:178952085-178952085 |
| 1972217       | 1972217 | 1858466 | c.?             | p.E545K    | Substitution - Missense      |                       |
| 1244807       | 1244807 | 1156513 | c.1624G>A       | p.E542K    | Substitution - Missense      | 3:178936082-178936082 |
| 1972141       | 1972141 | 1858390 | c.?             | p.E542K    | Substitution - Missense      |                       |
| 1018004       | 1018004 | 935162  | c.3140A>G       | p.H1047R   | Substitution - Missense      | 3:178952085-178952085 |
| 1135899       | 1135899 | 1048463 | c.1624G>A       | p.E542K    | Substitution - Missense      | 3:178936082-178936082 |
| 1670308       | 1670308 | 1583594 | c.3140A>G       | p.H1047R   | Substitution - Missense      | 3:178952085-178952085 |
| 1670208       | 1670208 | 1583494 | c.3140A>G       | p.H1047R   | Substitution - Missense      | 3:178952085-178952085 |
| 1193523       | 1193523 | 1105419 | c.?             | p.H1047R   | Substitution - Missense      |                       |
| 1244790       | 1244790 | 1156496 | c.1624G>A       | p.E542K    | Substitution - Missense      | 3:178936082-178936082 |
| 107778        | 1520603 | 1442978 | c.3140A>G       | p.H1047R   | Substitution - Missense      | 3:178952085-178952085 |

|                |         |         |           |          |                         |                       |
|----------------|---------|---------|-----------|----------|-------------------------|-----------------------|
| 1329896        | 1329896 | 1240381 | c.1633G>A | p.E545K  | Substitution - Missense | 3:178936091-178936091 |
| 1972447        | 1972447 | 1858696 | c.?       | p.H1047R | Substitution - Missense |                       |
| 1443962        | 1443962 | 1368207 | c.?       | p.H1047R | Substitution - Missense |                       |
| 1301933        | 1301933 | 1212984 | c.1633G>A | p.E545K  | Substitution - Missense | 3:178936091-178936091 |
| 1134423        | 1134423 | 1047083 | c.3140A>G | p.H1047R | Substitution - Missense | 3:178952085-178952085 |
| 1738894        | 1738894 | 1644725 | c.1624G>A | p.E542K  | Substitution - Missense | 3:178936082-178936082 |
| 1443629        | 1443629 | 1367874 | c.?       | p.H1047R | Substitution - Missense |                       |
| 1703802        | 1703802 | 1611911 | c.3140A>G | p.H1047R | Substitution - Missense | 3:178952085-178952085 |
| 1676178        | 1676178 | 1588950 | c.?       | p.H1047R | Substitution - Missense |                       |
| 1703769        | 1703769 | 1611878 | c.1633G>A | p.E545K  | Substitution - Missense | 3:178936091-178936091 |
| 1972292        | 1972292 | 1858541 | c.?       | p.E545K  | Substitution - Missense |                       |
| 904413         | 904413  | 821958  | c.1624G>A | p.E542K  | Substitution - Missense | 3:178936082-178936082 |
| 1670200        | 1670200 | 1583486 | c.1633G>C | p.E545Q  | Substitution - Missense | 3:178936091-178936091 |
| 1657048        | 1657048 | 1571703 | c.1635G>C | p.E545D  | Substitution - Missense | 3:178936093-178936093 |
| 1676214        | 1676214 | 1588986 | c.?       | p.H1047R | Substitution - Missense |                       |
| 1972436        | 1972436 | 1858685 | c.?       | p.H1047R | Substitution - Missense |                       |
| 1691691        | 1691691 | 1599957 | c.?       | p.N345K  | Substitution - Missense |                       |
| 1301963        | 1301963 | 1213014 | c.3140A>G | p.H1047R | Substitution - Missense | 3:178952085-178952085 |
| 1703820        | 1703820 | 1611929 | c.3140A>G | p.H1047R | Substitution - Missense | 3:178952085-178952085 |
| 1321151        | 1321151 | 1232038 | c.3140A>G | p.H1047R | Substitution - Missense | 3:178952085-178952085 |
| 1329567        | 1329567 | 1240052 | c.1624G>A | p.E542K  | Substitution - Missense | 3:178936082-178936082 |
| 904436         | 904436  | 821981  | c.2102A>C | p.H701P  | Substitution - Missense | 3:178938860-178938860 |
| BT-474         | 1136353 | 1048917 | c.?       | p.K111N  | Substitution - Missense |                       |
| 1972338        | 1972338 | 1858587 | c.?       | p.H1047L | Substitution - Missense |                       |
| 1670309        | 1670309 | 1583595 | c.3140A>G | p.H1047R | Substitution - Missense | 3:178952085-178952085 |
| 1698867        | 1698867 | 1606985 | c.3140A>G | p.H1047R | Substitution - Missense | 3:178952085-178952085 |
| 1670212        | 1670212 | 1583498 | c.3140A>G | p.H1047R | Substitution - Missense | 3:178952085-178952085 |
| MCF-7          | 1136341 | 1048905 | c.1633G>A | p.E545K  | Substitution - Missense | 3:178936091-178936091 |
| 1972262        | 1972262 | 1858511 | c.?       | p.E545K  | Substitution - Missense |                       |
| 1301930        | 1301930 | 1212981 | c.1624G>A | p.E542K  | Substitution - Missense | 3:178936082-178936082 |
| 1703812        | 1703812 | 1611921 | c.3140A>G | p.H1047R | Substitution - Missense | 3:178952085-178952085 |
| 1972416        | 1972416 | 1858665 | c.?       | p.H1047R | Substitution - Missense |                       |
| 1703852        | 1703852 | 1611961 | c.3140A>G | p.H1047R | Substitution - Missense | 3:178952085-178952085 |
| 1124157        | 1124157 | 1037200 | c.1633G>A | p.E545K  | Substitution - Missense | 3:178936091-178936091 |
| 1972227        | 1972227 | 1858476 | c.?       | p.E545K  | Substitution - Missense |                       |
| 1176655        | 1176655 | 1088652 | c.3140A>G | p.H1047R | Substitution - Missense | 3:178952085-178952085 |
| TCGA-E9-A229-0 | 1900216 | 1788900 | c.3140A>G | p.H1047R | Substitution - Missense | 3:178952085-178952085 |
| MCF-7          | 894096  | 811864  | c.1624G>A | p.E542K  | Substitution - Missense | 3:178936082-178936082 |
| 1972467        | 1972467 | 1858716 | c.?       | p.H1047R | Substitution - Missense |                       |
| 904442         | 904442  | 821987  | c.3140A>G | p.H1047R | Substitution - Missense | 3:178952085-178952085 |
| 1018406        | 1018406 | 935564  | c.1634A>C | p.E545A  | Substitution - Missense | 3:178936092-178936092 |
| 1321141        | 1321141 | 1232028 | c.3140A>G | p.H1047R | Substitution - Missense | 3:178952085-178952085 |
| 1135906        | 1135906 | 1048470 | c.1035T>A | p.N345K  | Substitution - Missense | 3:178921553-178921553 |

|               |         |         |           |          |                         |                       |
|---------------|---------|---------|-----------|----------|-------------------------|-----------------------|
| 1972289       | 1972289 | 1858538 | c.?       | p.E545K  | Substitution - Missense |                       |
| E40072        | 894124  | 811892  | c.3140A>T | p.H1047L | Substitution - Missense | 3:178952085-178952085 |
| 1720330       | 1720330 | 1627610 | c.?       | p.H1047R | Substitution - Missense |                       |
| 904429        | 904429  | 821974  | c.1633G>A | p.E545K  | Substitution - Missense | 3:178936091-178936091 |
| 1124238       | 1124238 | 1037281 | c.1624G>A | p.E542K  | Substitution - Missense | 3:178936082-178936082 |
| 1301925       | 1301925 | 1212976 | c.1624G>A | p.E542K  | Substitution - Missense | 3:178936082-178936082 |
| 1703845       | 1703845 | 1611954 | c.3140A>G | p.H1047R | Substitution - Missense | 3:178952085-178952085 |
| CGA-D8-A1JN-0 | 1900060 | 1788744 | c.1633G>A | p.E545K  | Substitution - Missense | 3:178936091-178936091 |
| 904431        | 904431  | 821976  | c.1633G>A | p.E545K  | Substitution - Missense | 3:178936091-178936091 |
| 1301922       | 1301922 | 1212973 | c.1624G>A | p.E542K  | Substitution - Missense | 3:178936082-178936082 |
| 1972381       | 1972381 | 1858630 | c.?       | p.H1047R | Substitution - Missense |                       |
| 1135853       | 1135853 | 1048417 | c.3140A>G | p.H1047R | Substitution - Missense | 3:178952085-178952085 |
| 1435077       | 1435077 | 1344435 | c.?       | p.H1047R | Substitution - Missense |                       |
| 1675744       | 1675744 | 1588618 | c.3140A>G | p.H1047R | Substitution - Missense | 3:178952085-178952085 |
| 1972265       | 1972265 | 1858514 | c.?       | p.E545K  | Substitution - Missense |                       |
| 1443606       | 1443606 | 1367851 | c.?       | p.H1047R | Substitution - Missense |                       |
| 1297104       | 1297104 | 1208158 | c.?       | p.H1047L | Substitution - Missense |                       |
| 1703772       | 1703772 | 1611881 | c.1633G>A | p.E545K  | Substitution - Missense | 3:178936091-178936091 |
| 4             | 1971253 | 1857502 | c.1633G>A | p.E545K  | Substitution - Missense | 3:178936091-178936091 |
| 2067952       | 2067952 | 1947745 | c.?       | p.H1047R | Substitution - Missense |                       |
| 1425134       | 1425134 | 1335162 | c.?       | p.H1047R | Substitution - Missense |                       |
| 1443722       | 1443722 | 1367967 | c.?       | p.H1047R | Substitution - Missense |                       |
| 1972332       | 1972332 | 1858581 | c.?       | p.H1047L | Substitution - Missense |                       |
| 1670213       | 1670213 | 1583499 | c.3140A>G | p.H1047R | Substitution - Missense | 3:178952085-178952085 |
| CGA-BH-A0DD-C | 1899909 | 1788593 | c.3140A>G | p.H1047R | Substitution - Missense | 3:178952085-178952085 |
| CGA-EW-A1J5-0 | 1900238 | 1788922 | c.1633G>A | p.E545K  | Substitution - Missense | 3:178936091-178936091 |
| CGA-EW-A1J5-0 | 1900238 | 1788922 | c.2176G>A | p.E726K  | Substitution - Missense | 3:178938934-178938934 |
| 1703803       | 1703803 | 1611912 | c.3140A>G | p.H1047R | Substitution - Missense | 3:178952085-178952085 |
| 1419261       | 1419261 | 1329302 | c.1633G>A | p.E545K  | Substitution - Missense | 3:178936091-178936091 |
| 1972296       | 1972296 | 1858545 | c.?       | p.E545K  | Substitution - Missense |                       |
| 1124399       | 1124399 | 1037442 | c.1633G>A | p.E545K  | Substitution - Missense | 3:178936091-178936091 |
| 1321143       | 1321143 | 1232030 | c.3140A>G | p.H1047R | Substitution - Missense | 3:178952085-178952085 |
| 1321117       | 1321117 | 1232004 | c.1624G>A | p.E542K  | Substitution - Missense | 3:178936082-178936082 |
| 1972496       | 1972496 | 1858745 | c.?       | p.H1047R | Substitution - Missense |                       |
| 2067953       | 2067953 | 1947746 | c.?       | p.H1047R | Substitution - Missense |                       |
| 1676225       | 1676225 | 1588997 | c.?       | p.H1047R | Substitution - Missense |                       |
| 1244942       | 1244942 | 1156648 | c.3140A>G | p.H1047R | Substitution - Missense | 3:178952085-178952085 |
| 1972387       | 1972387 | 1858636 | c.?       | p.H1047R | Substitution - Missense |                       |
| 1193390       | 1193390 | 1105286 | c.3184A>G | p.I1062V | Substitution - Missense | 3:178952129-178952129 |
| 1698883       | 1698883 | 1607001 | c.3140A>G | p.H1047R | Substitution - Missense | 3:178952085-178952085 |
| 1972173       | 1972173 | 1858422 | c.?       | p.E542K  | Substitution - Missense |                       |
| 1329733       | 1329733 | 1240218 | c.3140A>G | p.H1047R | Substitution - Missense | 3:178952085-178952085 |
| 1419236       | 1419236 | 1329277 | c.3140A>G | p.H1047R | Substitution - Missense | 3:178952085-178952085 |

|               |         |         |           |          |                         |                       |
|---------------|---------|---------|-----------|----------|-------------------------|-----------------------|
| 1301950       | 1301950 | 1213001 | c.3140A>G | p.H1047R | Substitution - Missense | 3:178952085-178952085 |
| 1703726       | 1703726 | 1611835 | c.1624G>A | p.E542K  | Substitution - Missense | 3:178936082-178936082 |
| HF-17468-(1)  | 1507747 | 1430613 | c.1411C>G | p.P471A  | Substitution - Missense | 3:178928225-178928225 |
| HF-17468-(1)  | 1507747 | 1430613 | c.3140A>G | p.H1047R | Substitution - Missense | 3:178952085-178952085 |
| 1124401       | 1124401 | 1037444 | c.1633G>A | p.E545K  | Substitution - Missense | 3:178936091-178936091 |
| 1882754       | 1882754 | 1772874 | c.3140A>G | p.H1047R | Substitution - Missense | 3:178952085-178952085 |
| 1972350       | 1972350 | 1858599 | c.?       | p.H1047R | Substitution - Missense |                       |
| 1244852       | 1244852 | 1156558 | c.1637A>C | p.Q546P  | Substitution - Missense | 3:178936095-178936095 |
| 1124244       | 1124244 | 1037287 | c.1633G>A | p.E545K  | Substitution - Missense | 3:178936091-178936091 |
| 901505        | 901505  | 819117  | c.3140A>G | p.H1047R | Substitution - Missense | 3:178952085-178952085 |
| SK-BR-5       | 1046938 | 963169  | c.3140A>G | p.H1047R | Substitution - Missense | 3:178952085-178952085 |
| 1698834       | 1698834 | 1606952 | c.?       | p.E542K  | Substitution - Missense |                       |
| 1244933       | 1244933 | 1156639 | c.3140A>G | p.H1047R | Substitution - Missense | 3:178952085-178952085 |
| 1522788       | 1522788 | 1445160 | c.1637A>C | p.Q546P  | Substitution - Missense | 3:178936095-178936095 |
| SUM190PT      | 1046941 | 963172  | c.3140A>G | p.H1047R | Substitution - Missense | 3:178952085-178952085 |
| BC86          | 1281052 | 1192343 | c.?       | p.H1047R | Substitution - Missense |                       |
| BC84          | 1281050 | 1192341 | c.?       | p.H1047L | Substitution - Missense |                       |
| CGA-BH-A0EB-0 | 1779620 | 1683619 | c.3140A>G | p.H1047R | Substitution - Missense | 3:178952085-178952085 |
| 1329748       | 1329748 | 1240233 | c.3140A>G | p.H1047R | Substitution - Missense | 3:178952085-178952085 |
| CGA-E2-A15E-0 | 1900136 | 1788820 | c.3140A>G | p.H1047R | Substitution - Missense | 3:178952085-178952085 |
| CGA-AO-A12A-0 | 1899790 | 1788474 | c.1624G>A | p.E542K  | Substitution - Missense | 3:178936082-178936082 |
| 904468        | 904468  | 822013  | c.3140A>G | p.H1047R | Substitution - Missense | 3:178952085-178952085 |
| 1193551       | 1193551 | 1105447 | c.?       | p.E545K  | Substitution - Missense |                       |
| BT-483        | 1046935 | 963166  | c.1624G>A | p.E542K  | Substitution - Missense | 3:178936082-178936082 |
| 1321142       | 1321142 | 1232029 | c.3140A>G | p.H1047R | Substitution - Missense | 3:178952085-178952085 |
| 1124382       | 1124382 | 1037425 | c.1624G>A | p.E542K  | Substitution - Missense | 3:178936082-178936082 |
| 1670216       | 1670216 | 1583502 | c.3140A>G | p.H1047R | Substitution - Missense | 3:178952085-178952085 |
| 1301979       | 1301979 | 1213030 | c.3140A>T | p.H1047L | Substitution - Missense | 3:178952085-178952085 |
| 1443708       | 1443708 | 1367953 | c.?       | p.H1047R | Substitution - Missense |                       |
| 1278870       | 1278870 | 1190166 | c.?       | p.E542K  | Substitution - Missense |                       |
| 1670299       | 1670299 | 1583585 | c.1633G>A | p.E545K  | Substitution - Missense | 3:178936091-178936091 |
| BC105         | 1281071 | 1192362 | c.?       | p.E545K  | Substitution - Missense |                       |
| SUM-185       | 904390  | 821935  | c.3140A>G | p.H1047R | Substitution - Missense | 3:178952085-178952085 |
| CGA-BH-A1EU-0 | 1899967 | 1788651 | c.3140A>T | p.H1047L | Substitution - Missense | 3:178952085-178952085 |
| 1703738       | 1703738 | 1611847 | c.1624G>A | p.E542K  | Substitution - Missense | 3:178936082-178936082 |
| 1691693       | 1691693 | 1599959 | c.?       | p.E542K  | Substitution - Missense |                       |
| 1244907       | 1244907 | 1156613 | c.3140A>G | p.H1047R | Substitution - Missense | 3:178952085-178952085 |
| 1720342       | 1720342 | 1627622 | c.?       | p.E545K  | Substitution - Missense |                       |
| CGA-A2-A0EY-0 | 1899626 | 1788310 | c.353G>A  | p.G118D  | Substitution - Missense | 3:178917478-178917478 |
| 1329728       | 1329728 | 1240213 | c.1636C>A | p.Q546K  | Substitution - Missense | 3:178936094-178936094 |
| 1135890       | 1135890 | 1048454 | c.1633G>A | p.E545K  | Substitution - Missense | 3:178936091-178936091 |
| HCC202        | 1018461 | 935619  | c.1633G>A | p.E545K  | Substitution - Missense | 3:178936091-178936091 |
| 1321157       | 1321157 | 1232044 | c.3145G>C | p.G1049R | Substitution - Missense | 3:178952090-178952090 |



|               |         |         |           |          |                              |                       |
|---------------|---------|---------|-----------|----------|------------------------------|-----------------------|
| PD4935a       | 1456086 | 1380059 | c.1624G>A | p.E542K  | Substitution - Missense      | 3:178936082-178936082 |
| CGA-BH-A42T-0 | 2187792 | 2056070 | c.3140A>G | p.H1047R | Substitution - Missense      | 3:178952085-178952085 |
| 1703764       | 1703764 | 1611873 | c.1633G>A | p.E545K  | Substitution - Missense      | 3:178936091-178936091 |
| 1329894       | 1329894 | 1240379 | c.1633G>A | p.E545K  | Substitution - Missense      | 3:178936091-178936091 |
| 1972305       | 1972305 | 1858554 | c.?       | p.E545K  | Substitution - Missense      |                       |
| 1135843       | 1135843 | 1048407 | c.3140A>G | p.H1047R | Substitution - Missense      | 3:178952085-178952085 |
| 1135869       | 1135869 | 1048433 | c.1633G>A | p.E545K  | Substitution - Missense      | 3:178936091-178936091 |
| 1244782       | 1244782 | 1156488 | c.1258T>C | p.C420R  | Substitution - Missense      | 3:178927980-178927980 |
| CGA-BH-A0HN-C | 1779636 | 1683635 | c.1035T>A | p.N345K  | Substitution - Missense      | 3:178921553-178921553 |
| 1212744       | 1212744 | 1124611 | c.1633G>A | p.E545K  | Substitution - Missense      | 3:178936091-178936091 |
| CGA-AR-A24T-0 | 1899842 | 1788526 | c.3140A>G | p.H1047R | Substitution - Missense      | 3:178952085-178952085 |
| 1329736       | 1329736 | 1240221 | c.3140A>G | p.H1047R | Substitution - Missense      | 3:178952085-178952085 |
| BT483         | 1018466 | 935624  | c.1624G>A | p.E542K  | Substitution - Missense      | 3:178936082-178936082 |
| 1135819       | 1135819 | 1048383 | c.3140A>G | p.H1047R | Substitution - Missense      | 3:178952085-178952085 |
| 1321124       | 1321124 | 1232011 | c.1633G>A | p.E545K  | Substitution - Missense      | 3:178936091-178936091 |
| CGA-A8-A0A1-0 | 1899733 | 1788417 | c.1633G>A | p.E545K  | Substitution - Missense      | 3:178936091-178936091 |
| 1443753       | 1443753 | 1367998 | c.?       | p.H1047R | Substitution - Missense      |                       |
| CGA-E2-A1L8-0 | 1900173 | 1788857 | c.3140A>G | p.H1047R | Substitution - Missense      | 3:178952085-178952085 |
| 1135867       | 1135867 | 1048431 | c.1633G>A | p.E545K  | Substitution - Missense      | 3:178936091-178936091 |
| 1212759       | 1212759 | 1124626 | c.3140A>T | p.H1047L | Substitution - Missense      | 3:178952085-178952085 |
| 1124600       | 1124600 | 1037643 | c.3140A>G | p.H1047R | Substitution - Missense      | 3:178952085-178952085 |
| 1244948       | 1244948 | 1156654 | c.3140A>G | p.H1047R | Substitution - Missense      | 3:178952085-178952085 |
| 1530089       | 1530089 | 1452461 | c.3140A>G | p.H1047R | Substitution - Missense      | 3:178952085-178952085 |
| 1698510       | 1698510 | 1606628 | c.1634A>C | p.E545A  | Substitution - Missense      | 3:178936092-178936092 |
| 1972222       | 1972222 | 1858471 | c.?       | p.E545K  | Substitution - Missense      |                       |
| 1698510       | 1698510 | 1606628 | c.1624G>A | p.E542K  | Substitution - Missense      | 3:178936082-178936082 |
| 1691786       | 1691786 | 1600052 | c.?       | p.H1047R | Substitution - Missense      |                       |
| 1244916       | 1244916 | 1156622 | c.3140A>G | p.H1047R | Substitution - Missense      | 3:178952085-178952085 |
| 1329897       | 1329897 | 1240382 | c.1633G>A | p.E545K  | Substitution - Missense      | 3:178936091-178936091 |
| CGA-AR-A2LK-0 | 2187813 | 2056091 | c.3140A>G | p.H1047R | Substitution - Missense      | 3:178952085-178952085 |
| 1124599       | 1124599 | 1037642 | c.3140A>G | p.H1047R | Substitution - Missense      | 3:178952085-178952085 |
| 1329899       | 1329899 | 1240384 | c.3140A>G | p.H1047R | Substitution - Missense      | 3:178952085-178952085 |
| 1675743       | 1675743 | 1588618 | c.3140A>G | p.H1047R | Substitution - Missense      | 3:178952085-178952085 |
| 1703723       | 1703723 | 1611832 | c.1624G>A | p.E542K  | Substitution - Missense      | 3:178936082-178936082 |
| HF-17410-(1)  | 1507760 | 1430626 | c.1624G>A | p.E542K  | Substitution - Missense      | 3:178936082-178936082 |
| 1676197       | 1676197 | 1588969 | c.?       | p.H1047R | Substitution - Missense      |                       |
| 1193533       | 1193533 | 1105429 | c.?       | p.H1047R | Substitution - Missense      |                       |
| 1018407       | 1018407 | 935565  | c.1634A>C | p.E545A  | Substitution - Missense      | 3:178936092-178936092 |
| CGA-C8-A1HF-0 | 1900019 | 1788703 | c.3140A>G | p.H1047R | Substitution - Missense      | 3:178952085-178952085 |
| CGA-C8-A1HF-0 | 1900019 | 1788703 | c.1833T>G | p.V611V  | Substitution - coding silent | 3:178937445-178937445 |
| CGA-A2-A0YK-0 | 1779319 | 1683318 | c.3140A>T | p.H1047L | Substitution - Missense      | 3:178952085-178952085 |
| CGA-C8-A130-0 | 1900010 | 1788694 | c.3140A>G | p.H1047R | Substitution - Missense      | 3:178952085-178952085 |
| CGA-D8-A1XM-C | 1900077 | 1788761 | c.1624G>A | p.E542K  | Substitution - Missense      | 3:178936082-178936082 |

|               |         |         |                  |                      |                         |                       |
|---------------|---------|---------|------------------|----------------------|-------------------------|-----------------------|
| CGA-EW-A1P5-0 | 1900248 | 1788932 | c.1364_1365insG  | p.L456fs*13          | Insertion - Frameshift  | 3:178928086-178928087 |
| CGA-EW-A1P5-0 | 1900248 | 1788932 | c.1338_1364del27 | p447_L455delPVPHGLEI | Deletion - In frame     | 3:178928060-178928086 |
| PD3988a       | 1280814 | 1192105 | c.3140A>G        | p.H1047R             | Substitution - Missense | 3:178952085-178952085 |
| CGA-EW-A1PE-C | 1900255 | 1788939 | c.3073A>G        | p.T1025A             | Substitution - Missense | 3:178952018-178952018 |
| CGA-EW-A1PE-C | 1900255 | 1788939 | c.1636C>A        | p.Q546K              | Substitution - Missense | 3:178936094-178936094 |
| CGA-BH-A0BO-C | 1899897 | 1788581 | c.3140A>G        | p.H1047R             | Substitution - Missense | 3:178952085-178952085 |
| CGA-BH-A0BF-0 | 1899892 | 1788576 | c.1035T>A        | p.N345K              | Substitution - Missense | 3:178921553-178921553 |
| 1193496       | 1193496 | 1105392 | c.?              | p.H1047R             | Substitution - Missense |                       |
| SA223         | 1659993 | 1574321 | c.3140A>G        | p.H1047R             | Substitution - Missense | 3:178952085-178952085 |
| 1212761       | 1212761 | 1124628 | c.3140A>G        | p.H1047R             | Substitution - Missense | 3:178952085-178952085 |
| 1244879       | 1244879 | 1156585 | c.3140A>G        | p.H1047R             | Substitution - Missense | 3:178952085-178952085 |
| 1972409       | 1972409 | 1858658 | c.?              | p.H1047R             | Substitution - Missense |                       |
| 103977        | 1520471 | 1442846 | c.3140A>G        | p.H1047R             | Substitution - Missense | 3:178952085-178952085 |
| 1244891       | 1244891 | 1156597 | c.3140A>G        | p.H1047R             | Substitution - Missense | 3:178952085-178952085 |
| 1972497       | 1972497 | 1858746 | c.?              | p.H1047R             | Substitution - Missense |                       |
| 1124127       | 1124127 | 1037170 | c.1624G>A        | p.E542K              | Substitution - Missense | 3:178936082-178936082 |
| 1321119       | 1321119 | 1232006 | c.1633G>A        | p.E545K              | Substitution - Missense | 3:178936091-178936091 |
| 1972299       | 1972299 | 1858548 | c.?              | p.E545K              | Substitution - Missense |                       |
| 1665028       | 1665028 | 1578478 | c.3140A>G        | p.H1047R             | Substitution - Missense | 3:178952085-178952085 |
| 1972397       | 1972397 | 1858646 | c.?              | p.H1047R             | Substitution - Missense |                       |
| 1329821       | 1329821 | 1240306 | c.3140A>G        | p.H1047R             | Substitution - Missense | 3:178952085-178952085 |
| 1135877       | 1135877 | 1048441 | c.1633G>A        | p.E545K              | Substitution - Missense | 3:178936091-178936091 |
| 1676172       | 1676172 | 1588944 | c.?              | p.H1047R             | Substitution - Missense |                       |
| 1443696       | 1443696 | 1367941 | c.?              | p.E542K              | Substitution - Missense |                       |
| 1321149       | 1321149 | 1232036 | c.3140A>G        | p.H1047R             | Substitution - Missense | 3:178952085-178952085 |
| 2107710       | 2107710 | 1985571 | c.3140A>G        | p.H1047R             | Substitution - Missense | 3:178952085-178952085 |
| 1972393       | 1972393 | 1858642 | c.?              | p.H1047R             | Substitution - Missense |                       |
| 1675753       | 1675753 | 1588623 | c.3140A>G        | p.H1047R             | Substitution - Missense | 3:178952085-178952085 |
| 1882678       | 1882678 | 1772798 | c.3140A>T        | p.H1047L             | Substitution - Missense | 3:178952085-178952085 |
| 1301956       | 1301956 | 1213007 | c.3140A>G        | p.H1047R             | Substitution - Missense | 3:178952085-178952085 |
| 1321121       | 1321121 | 1232008 | c.1633G>A        | p.E545K              | Substitution - Missense | 3:178936091-178936091 |
| 1301935       | 1301935 | 1212986 | c.1633G>A        | p.E545K              | Substitution - Missense | 3:178936091-178936091 |
| 1703765       | 1703765 | 1611874 | c.1633G>A        | p.E545K              | Substitution - Missense | 3:178936091-178936091 |
| 1135806       | 1135806 | 1048370 | c.3140A>G        | p.H1047R             | Substitution - Missense | 3:178952085-178952085 |
| 1738929       | 1738929 | 1644760 | c.3073A>K        | p.T1025?             | Substitution - Missense | 3:178952018-178952018 |
| 1135908       | 1135908 | 1048472 | c.1252G>A        | p.E418K              | Substitution - Missense | 3:178927974-178927974 |
| 1244778       | 1244778 | 1156484 | c.1258T>C        | p.C420R              | Substitution - Missense | 3:178927980-178927980 |
| 2042648       | 2042648 | 1923766 | c.1697C>T        | p.P566L              | Substitution - Missense | 3:178937016-178937016 |
| 1212766       | 1212766 | 1124633 | c.3140A>G        | p.H1047R             | Substitution - Missense | 3:178952085-178952085 |
| 1278881       | 1278881 | 1190177 | c.?              | p.H1047R             | Substitution - Missense |                       |
| 1297130       | 1297130 | 1208184 | c.?              | p.H1047R             | Substitution - Missense |                       |
| 1329595       | 1329595 | 1240080 | c.3140A>G        | p.H1047R             | Substitution - Missense | 3:178952085-178952085 |
| 1676269       | 1676269 | 1589041 | c.?              | p.E542K              | Substitution - Missense |                       |

|                 |         |         |           |           |                         |                         |                       |
|-----------------|---------|---------|-----------|-----------|-------------------------|-------------------------|-----------------------|
| CGA-A2-A0EW-0   | 1899624 | 1788308 | c.1637A>G | p.Q546R   | Substitution - Missense | 3:178936095-178936095   |                       |
|                 | 1329580 | 1240065 | c.1573G>A | p.E525K   | Substitution - Missense | 3:178936031-178936031   |                       |
|                 | 1124111 | 1037154 | c.3140A>G | p.H1047R  | Substitution - Missense | 3:178952085-178952085   |                       |
|                 | 901518  | 819130  | c.3140A>G | p.H1047R  | Substitution - Missense | 3:178952085-178952085   |                       |
|                 | 1703733 | 1611842 | c.1624G>A | p.E542K   | Substitution - Missense | 3:178936082-178936082   |                       |
|                 | 1972363 | 1858612 | c.?       | p.H1047R  | Substitution - Missense |                         |                       |
|                 | 1698882 | 1607000 | c.3140A>G | p.H1047R  | Substitution - Missense | 3:178952085-178952085   |                       |
|                 | 1972544 | 1858793 | c.?       | p.H1047R  | Substitution - Missense |                         |                       |
| CGA-BH-A0EA-0   | 1899928 | 1788612 | c.3140A>G | p.H1047R  | Substitution - Missense | 3:178952085-178952085   |                       |
|                 | 1018921 | 935944  | c.3140A>T | p.H1047L  | Substitution - Missense | 3:178952085-178952085   |                       |
| CGA-GM-A2DH-(   | 2187734 | 2056012 | c.1637A>G | p.Q546R   | Substitution - Missense | 3:178936095-178936095   |                       |
| CGA-GM-A2DH-(   | 2187734 | 2056012 | c.3019G>C | p.G1007R  | Substitution - Missense | 3:178951964-178951964   |                       |
|                 | 1419235 | 1329276 | c.3140A>G | p.H1047R  | Substitution - Missense | 3:178952085-178952085   |                       |
|                 | 1530097 | 1452469 | c.3140A>G | p.H1047R  | Substitution - Missense | 3:178952085-178952085   |                       |
| MDA-MB-453      | 1018468 | 935626  | c.3140A>G | p.H1047R  | Substitution - Missense | 3:178952085-178952085   |                       |
|                 | E40052  | 894104  | 811872    | c.1624G>A | p.E542K                 | Substitution - Missense | 3:178936082-178936082 |
| TCGA-E2-A1IL-0' | 1900167 | 1788851 | c.3140A>G | p.H1047R  | Substitution - Missense | 3:178952085-178952085   |                       |
|                 | 20      | 1860504 | 1751445   | c.3140A>G | p.H1047R                | Substitution - Missense | 3:178952085-178952085 |
|                 | 1738917 | 1738917 | 1644748   | c.3140A>G | p.H1047R                | Substitution - Missense | 3:178952085-178952085 |
| CGA-BH-A1F8-0   | 1899976 | 1788660 | c.3140A>G | p.H1047R  | Substitution - Missense | 3:178952085-178952085   |                       |
|                 | 1329601 | 1329601 | 1240086   | c.3140A>G | p.H1047R                | Substitution - Missense | 3:178952085-178952085 |
|                 | 1017185 | 1017185 | 934355    | c.1633G>A | p.E545K                 | Substitution - Missense | 3:178936091-178936091 |
|                 | 1709222 | 1709222 | 1617128   | c.?       | p.H1047R                | Substitution - Missense |                       |
|                 | 1018924 | 1018924 | 935947    | c.3140A>G | p.H1047R                | Substitution - Missense | 3:178952085-178952085 |
| HF-11219        | 1507802 | 1430668 | c.3140A>G | p.H1047R  | Substitution - Missense | 3:178952085-178952085   |                       |
|                 | 1443748 | 1443748 | 1367993   | c.?       | p.H1047R                | Substitution - Missense |                       |
|                 | 1297128 | 1297128 | 1208182   | c.?       | p.H1047R                | Substitution - Missense |                       |
|                 | 1193386 | 1193386 | 1105282   | c.3140A>G | p.H1047R                | Substitution - Missense | 3:178952085-178952085 |
| CGA-BH-A2L8-0   | 2187793 | 2056071 | c.3145G>C | p.G1049R  | Substitution - Missense | 3:178952090-178952090   |                       |
|                 | 1972294 | 1972294 | 1858543   | c.?       | p.E545K                 | Substitution - Missense |                       |
|                 | 1193544 | 1193544 | 1105440   | c.?       | p.H1047R                | Substitution - Missense |                       |
|                 | BC101   | 1281067 | 1192358   | c.?       | p.E1012K                | Substitution - Missense |                       |
|                 | 2067933 | 2067933 | 1947726   | c.?       | p.N345K                 | Substitution - Missense |                       |
|                 | 1017896 | 1017896 | 935054    | c.3140A>G | p.H1047R                | Substitution - Missense | 3:178952085-178952085 |
|                 | 1135810 | 1135810 | 1048374   | c.3140A>G | p.H1047R                | Substitution - Missense | 3:178952085-178952085 |
|                 | 1443607 | 1443607 | 1367852   | c.?       | p.H1047R                | Substitution - Missense |                       |
|                 | 1972161 | 1972161 | 1858410   | c.?       | p.E542K                 | Substitution - Missense |                       |
|                 | 1124411 | 1124411 | 1037454   | c.3140A>G | p.H1047R                | Substitution - Missense | 3:178952085-178952085 |
|                 | 1698877 | 1698877 | 1606995   | c.3140A>G | p.H1047R                | Substitution - Missense | 3:178952085-178952085 |
|                 | 1124248 | 1124248 | 1037291   | c.3140A>T | p.H1047L                | Substitution - Missense | 3:178952085-178952085 |
|                 | 1124122 | 1124122 | 1037165   | c.3140A>T | p.H1047L                | Substitution - Missense | 3:178952085-178952085 |
|                 | 1443902 | 1443902 | 1368147   | c.?       | p.H1047R                | Substitution - Missense |                       |
|                 | 1698838 | 1698838 | 1606956   | c.?       | p.E542K                 | Substitution - Missense |                       |

|               |         |         |         |                  |                |                         |                       |
|---------------|---------|---------|---------|------------------|----------------|-------------------------|-----------------------|
|               | 1193563 | 1193563 | 1105459 | c.?              | p.E545K        | Substitution - Missense |                       |
| CGA-E2-A14Y-0 | 1900122 | 1788806 | 1788806 | c.3140A>G        | p.H1047R       | Substitution - Missense | 3:178952085-178952085 |
|               | 1329578 | 1329578 | 1240063 | c.1633G>A        | p.E545K        | Substitution - Missense | 3:178936091-178936091 |
|               | 1738892 | 1738892 | 1644723 | c.1357G>A        | p.E453K        | Substitution - Missense | 3:178928079-178928079 |
|               | 1312252 | 1312252 | 1223161 | c.?              | p.E542K        | Substitution - Missense |                       |
|               | 1124606 | 1124606 | 1037649 | c.3140A>G        | p.H1047R       | Substitution - Missense | 3:178952085-178952085 |
|               | 1135888 | 1135888 | 1048452 | c.1633G>A        | p.E545K        | Substitution - Missense | 3:178936091-178936091 |
|               | 1301946 | 1301946 | 1212997 | c.3140A>G        | p.H1047R       | Substitution - Missense | 3:178952085-178952085 |
|               | 1321123 | 1321123 | 1232010 | c.1633G>A        | p.E545K        | Substitution - Missense | 3:178936091-178936091 |
|               | 1135885 | 1135885 | 1048449 | c.1633G>A        | p.E545K        | Substitution - Missense | 3:178936091-178936091 |
|               | 1329579 | 1329579 | 1240064 | c.1568T>C        | p.L523S        | Substitution - Missense | 3:178936026-178936026 |
|               | 1301946 | 1301946 | 1212997 | c.3085G>C        | p.D1029H       | Substitution - Missense | 3:178952030-178952030 |
|               | 1703779 | 1703779 | 1611888 | c.1636C>A        | p.Q546K        | Substitution - Missense | 3:178936094-178936094 |
| CGA-GM-A3XN-C | 2187723 | 2056001 | 2056001 | c.3140A>T        | p.H1047L       | Substitution - Missense | 3:178952085-178952085 |
| CGA-AC-A23C-0 | 1899740 | 1788424 | 1788424 | c.1637A>G        | p.Q546R        | Substitution - Missense | 3:178936095-178936095 |
| PD3856a       | 1301769 | 1212822 | 1212822 | c.3140A>G        | p.H1047R       | Substitution - Missense | 3:178952085-178952085 |
|               | 1972383 | 1972383 | 1858632 | c.?              | p.H1047R       | Substitution - Missense |                       |
|               | 1244887 | 1244887 | 1156593 | c.3140A>G        | p.H1047R       | Substitution - Missense | 3:178952085-178952085 |
|               | 904407  | 904407  | 821952  | c.1258T>C        | p.C420R        | Substitution - Missense | 3:178927980-178927980 |
|               | 1972444 | 1972444 | 1858693 | c.?              | p.H1047R       | Substitution - Missense |                       |
|               | 1670321 | 1670321 | 1583607 | c.3140A>G        | p.H1047R       | Substitution - Missense | 3:178952085-178952085 |
|               | 1419231 | 1419231 | 1329272 | c.3140A>G        | p.H1047R       | Substitution - Missense | 3:178952085-178952085 |
|               | 1135816 | 1135816 | 1048380 | c.3140A>G        | p.H1047R       | Substitution - Missense | 3:178952085-178952085 |
| HCC1954       | 904369  | 821914  | 821914  | c.3140A>G        | p.H1047R       | Substitution - Missense | 3:178952085-178952085 |
|               | 1675756 | 1675756 | 1588624 | c.3140A>G        | p.H1047R       | Substitution - Missense | 3:178952085-178952085 |
|               | 1244884 | 1244884 | 1156590 | c.3140A>G        | p.H1047R       | Substitution - Missense | 3:178952085-178952085 |
|               | 1124250 | 1124250 | 1037293 | c.3140A>T        | p.H1047L       | Substitution - Missense | 3:178952085-178952085 |
|               | 2067944 | 2067944 | 1947737 | c.?              | p.E542K        | Substitution - Missense |                       |
|               | 1122690 | 1122690 | 1035734 | c.(1624_1633)G>A | p.(542_545)E>K | Substitution - Missense |                       |
|               | 1676234 | 1676234 | 1589006 | c.?              | p.E545K        | Substitution - Missense |                       |
|               | 1018392 | 1018392 | 935550  | c.3140A>G        | p.H1047R       | Substitution - Missense | 3:178952085-178952085 |
| HF-11334      | 1507782 | 1430648 | 1430648 | c.3140A>G        | p.H1047R       | Substitution - Missense | 3:178952085-178952085 |
|               | 1972429 | 1972429 | 1858678 | c.?              | p.H1047R       | Substitution - Missense |                       |
|               | 1329734 | 1329734 | 1240219 | c.3140A>G        | p.H1047R       | Substitution - Missense | 3:178952085-178952085 |
|               | 1443640 | 1443640 | 1367885 | c.?              | p.H1047R       | Substitution - Missense |                       |
|               | 1972528 | 1972528 | 1858777 | c.?              | p.H1047R       | Substitution - Missense |                       |
|               | 1244785 | 1244785 | 1156491 | c.1624G>A        | p.E542K        | Substitution - Missense | 3:178936082-178936082 |
|               | 1329581 | 1329581 | 1240066 | c.1592T>C        | p.L531P        | Substitution - Missense | 3:178936050-178936050 |
| BC5           | 1280971 | 1192262 | 1192262 | c.?              | p.H1047R       | Substitution - Missense |                       |
|               | 1329726 | 1329726 | 1240211 | c.1624G>A        | p.E542K        | Substitution - Missense | 3:178936082-178936082 |
|               | 1882660 | 1882660 | 1772780 | c.1624G>A        | p.E542K        | Substitution - Missense | 3:178936082-178936082 |
|               | 1972404 | 1972404 | 1858653 | c.?              | p.H1047R       | Substitution - Missense |                       |
|               | 1122681 | 1122681 | 1035725 | c.3140A>G        | p.H1047R       | Substitution - Missense | 3:178952085-178952085 |

|               |         |         |           |          |                         |                       |
|---------------|---------|---------|-----------|----------|-------------------------|-----------------------|
| 1124266       | 1124266 | 1037309 | c.3140A>G | p.H1047R | Substitution - Missense | 3:178952085-178952085 |
| 904418        | 904418  | 821963  | c.1624G>A | p.E542K  | Substitution - Missense | 3:178936082-178936082 |
| 1670316       | 1670316 | 1583602 | c.3140A>G | p.H1047R | Substitution - Missense | 3:178952085-178952085 |
| 1703815       | 1703815 | 1611924 | c.3140A>G | p.H1047R | Substitution - Missense | 3:178952085-178952085 |
| 1135809       | 1135809 | 1048373 | c.3140A>G | p.H1047R | Substitution - Missense | 3:178952085-178952085 |
| 1244835       | 1244835 | 1156541 | c.1633G>A | p.E545K  | Substitution - Missense | 3:178936091-178936091 |
| BC44          | 1281010 | 1192301 | c.?       | p.H1047R | Substitution - Missense |                       |
| 1301971       | 1301971 | 1213022 | c.3140A>G | p.H1047R | Substitution - Missense | 3:178952085-178952085 |
| PD4128a       | 1331083 | 1241557 | c.1633G>A | p.E545K  | Substitution - Missense | 3:178936091-178936091 |
| 1135839       | 1135839 | 1048403 | c.3140A>G | p.H1047R | Substitution - Missense | 3:178952085-178952085 |
| 1835028       | 1835028 | 1730060 | c.?       | p.H1047R | Substitution - Missense |                       |
| 1124254       | 1124254 | 1037297 | c.3140A>G | p.H1047R | Substitution - Missense | 3:178952085-178952085 |
| 2042676       | 2042676 | 1923794 | c.3140A>G | p.H1047R | Substitution - Missense | 3:178952085-178952085 |
| 1670326       | 1670326 | 1583612 | c.3140A>G | p.H1047R | Substitution - Missense | 3:178952085-178952085 |
| CGA-AC-A3TN-0 | 2187831 | 2056109 | c.3140A>G | p.H1047R | Substitution - Missense | 3:178952085-178952085 |
| 1135870       | 1135870 | 1048434 | c.1633G>A | p.E545K  | Substitution - Missense | 3:178936091-178936091 |
| 2042676       | 2042676 | 1923794 | c.3143A>G | p.H1048R | Substitution - Missense | 3:178952088-178952088 |
| 1972493       | 1972493 | 1858742 | c.?       | p.H1047R | Substitution - Missense |                       |
| 1972323       | 1972323 | 1858572 | c.?       | p.H1047L | Substitution - Missense |                       |
| 1972203       | 1972203 | 1858452 | c.?       | p.E545K  | Substitution - Missense |                       |
| 1193517       | 1193517 | 1105413 | c.?       | p.H1047R | Substitution - Missense |                       |
| 1703839       | 1703839 | 1611948 | c.3140A>G | p.H1047R | Substitution - Missense | 3:178952085-178952085 |
| 1670314       | 1670314 | 1583600 | c.3140A>G | p.H1047R | Substitution - Missense | 3:178952085-178952085 |
| 1703760       | 1703760 | 1611869 | c.1633G>A | p.E545K  | Substitution - Missense | 3:178936091-178936091 |
| CGA-E9-A226-0 | 1900213 | 1788897 | c.1035T>A | p.N345K  | Substitution - Missense | 3:178921553-178921553 |
| 1193506       | 1193506 | 1105402 | c.?       | p.H1047R | Substitution - Missense |                       |
| 1972550       | 1972550 | 1858799 | c.?       | p.H1047R | Substitution - Missense |                       |
| 1244928       | 1244928 | 1156634 | c.3140A>G | p.H1047R | Substitution - Missense | 3:178952085-178952085 |
| HCC1954       | 1430345 | 1339759 | c.3140A>G | p.H1047R | Substitution - Missense | 3:178952085-178952085 |
| 1135847       | 1135847 | 1048411 | c.3140A>G | p.H1047R | Substitution - Missense | 3:178952085-178952085 |
| CGA-EW-A11X-0 | 1900232 | 1788916 | c.3140A>G | p.H1047R | Substitution - Missense | 3:178952085-178952085 |
| 904435        | 904435  | 821980  | c.1633G>A | p.E545K  | Substitution - Missense | 3:178936091-178936091 |
| 1135882       | 1135882 | 1048446 | c.1633G>A | p.E545K  | Substitution - Missense | 3:178936091-178936091 |
| 1972297       | 1972297 | 1858546 | c.?       | p.E545K  | Substitution - Missense |                       |
| 1193525       | 1193525 | 1105421 | c.?       | p.H1047R | Substitution - Missense |                       |
| CGA-BH-A0DP-0 | 1899916 | 1788600 | c.1624G>A | p.E542K  | Substitution - Missense | 3:178936082-178936082 |
| 1972421       | 1972421 | 1858670 | c.?       | p.H1047R | Substitution - Missense |                       |
| 2053338       | 2053338 | 1933587 | c.?       | p.E545K  | Substitution - Missense |                       |
| 1657050       | 1657050 | 1571705 | c.1635G>C | p.E545D  | Substitution - Missense | 3:178936093-178936093 |
| 1972422       | 1972422 | 1858671 | c.?       | p.H1047R | Substitution - Missense |                       |
| 1244824       | 1244824 | 1156530 | c.1633G>A | p.E545K  | Substitution - Missense | 3:178936091-178936091 |
| 1244859       | 1244859 | 1156565 | c.3140A>T | p.H1047L | Substitution - Missense | 3:178952085-178952085 |
| 103850        | 1520536 | 1442911 | c.3140A>G | p.H1047R | Substitution - Missense | 3:178952085-178952085 |

|               |         |         |           |          |                         |                       |
|---------------|---------|---------|-----------|----------|-------------------------|-----------------------|
| PD3989a       | 1280816 | 1192107 | c.1633G>A | p.E545K  | Substitution - Missense | 3:178936091-178936091 |
| 1698839       | 1698839 | 1606957 | c.?       | p.E542K  | Substitution - Missense |                       |
| 1329598       | 1329598 | 1240083 | c.3140A>G | p.H1047R | Substitution - Missense | 3:178952085-178952085 |
| 1698885       | 1698885 | 1607003 | c.3140A>G | p.H1047R | Substitution - Missense | 3:178952085-178952085 |
| 1972245       | 1972245 | 1858494 | c.?       | p.E545K  | Substitution - Missense |                       |
| 1443947       | 1443947 | 1368192 | c.?       | p.E542K  | Substitution - Missense |                       |
| 1301965       | 1301965 | 1213016 | c.3140A>G | p.H1047R | Substitution - Missense | 3:178952085-178952085 |
| 1720281       | 1720281 | 1627561 | c.?       | p.E545K  | Substitution - Missense |                       |
| 1017888       | 1017888 | 935046  | c.1624G>A | p.E542K  | Substitution - Missense | 3:178936082-178936082 |
| 1321126       | 1321126 | 1232013 | c.1633G>A | p.E545K  | Substitution - Missense | 3:178936091-178936091 |
| MDA-MB-361    | 1289397 | 1200672 | c.1700A>G | p.K567R  | Substitution - Missense | 3:178937019-178937019 |
| 1244903       | 1244903 | 1156609 | c.3140A>G | p.H1047R | Substitution - Missense | 3:178952085-178952085 |
| 1244906       | 1244906 | 1156612 | c.3140A>G | p.H1047R | Substitution - Missense | 3:178952085-178952085 |
| 1244834       | 1244834 | 1156540 | c.1633G>A | p.E545K  | Substitution - Missense | 3:178936091-178936091 |
| MDA-MB-361    | 1289397 | 1200672 | c.1633G>A | p.E545K  | Substitution - Missense | 3:178936091-178936091 |
| 1193556       | 1193556 | 1105452 | c.?       | p.E545K  | Substitution - Missense |                       |
| 1703739       | 1703739 | 1611848 | c.1624G>A | p.E542K  | Substitution - Missense | 3:178936082-178936082 |
| 1972478       | 1972478 | 1858727 | c.?       | p.H1047R | Substitution - Missense |                       |
| 2131996       | 2131996 | 2006059 | c.?       | p.H1047R | Substitution - Missense |                       |
| 1738930       | 1738930 | 1644761 | c.3073A>K | p.T1025? | Substitution - Missense | 3:178952018-178952018 |
| 1244890       | 1244890 | 1156596 | c.3140A>G | p.H1047R | Substitution - Missense | 3:178952085-178952085 |
| 1698516       | 1698516 | 1606634 | c.1634A>C | p.E545A  | Substitution - Missense | 3:178936092-178936092 |
| 1017899       | 1017899 | 935057  | c.3140A>G | p.H1047R | Substitution - Missense | 3:178952085-178952085 |
| 1703774       | 1703774 | 1611883 | c.1633G>A | p.E545K  | Substitution - Missense | 3:178936091-178936091 |
| 1972220       | 1972220 | 1858469 | c.?       | p.E545K  | Substitution - Missense |                       |
| BC14          | 1280980 | 1192271 | c.?       | p.E545K  | Substitution - Missense |                       |
| 1329819       | 1329819 | 1240304 | c.1371C>G | p.N457K  | Substitution - Missense | 3:178928093-178928093 |
| 1018386       | 1018386 | 935544  | c.3140A>G | p.H1047R | Substitution - Missense | 3:178952085-178952085 |
| 1972195       | 1972195 | 1858444 | c.?       | p.E542Q  | Substitution - Missense |                       |
| 1212747       | 1212747 | 1124614 | c.1624G>A | p.E542K  | Substitution - Missense | 3:178936082-178936082 |
| CGA-BH-A0H9-0 | 1899938 | 1788622 | c.3019G>C | p.G1007R | Substitution - Missense | 3:178951964-178951964 |
| 1676266       | 1676266 | 1589038 | c.?       | p.E542K  | Substitution - Missense |                       |
| 1134422       | 1134422 | 1047082 | c.1633G>A | p.E545K  | Substitution - Missense | 3:178936091-178936091 |
| 901514        | 901514  | 819126  | c.3140A>G | p.H1047R | Substitution - Missense | 3:178952085-178952085 |
| 1244794       | 1244794 | 1156500 | c.1624G>A | p.E542K  | Substitution - Missense | 3:178936082-178936082 |
| 904412        | 904412  | 821957  | c.1624G>A | p.E542K  | Substitution - Missense | 3:178936082-178936082 |
| 1244833       | 1244833 | 1156539 | c.1633G>A | p.E545K  | Substitution - Missense | 3:178936091-178936091 |
| 1244914       | 1244914 | 1156620 | c.3140A>G | p.H1047R | Substitution - Missense | 3:178952085-178952085 |
| 1738916       | 1738916 | 1644747 | c.3140A>G | p.H1047R | Substitution - Missense | 3:178952085-178952085 |
| 1329905       | 1329905 | 1240390 | c.3140A>G | p.H1047R | Substitution - Missense | 3:178952085-178952085 |
| 1530105       | 1530105 | 1452477 | c.1634A>C | p.E545A  | Substitution - Missense | 3:178936092-178936092 |
| 1698845       | 1698845 | 1606963 | c.?       | p.E545K  | Substitution - Missense |                       |
| 1244951       | 1244951 | 1156657 | c.3140A>G | p.H1047R | Substitution - Missense | 3:178952085-178952085 |

|               |         |         |           |          |                         |                       |
|---------------|---------|---------|-----------|----------|-------------------------|-----------------------|
| 1703842       | 1703842 | 1611951 | c.3140A>G | p.H1047R | Substitution - Missense | 3:178952085-178952085 |
| 1443737       | 1443737 | 1367982 | c.?       | p.H1047R | Substitution - Missense |                       |
| 904443        | 904443  | 821988  | c.3140A>G | p.H1047R | Substitution - Missense | 3:178952085-178952085 |
| T47D          | 1289418 | 1200693 | c.3140A>G | p.H1047R | Substitution - Missense | 3:178952085-178952085 |
| 1301972       | 1301972 | 1213023 | c.3140A>G | p.H1047R | Substitution - Missense | 3:178952085-178952085 |
| 1329594       | 1329594 | 1240079 | c.3140A>G | p.H1047R | Substitution - Missense | 3:178952085-178952085 |
| 2067908       | 2067908 | 1947701 | c.?       | p.E542K  | Substitution - Missense |                       |
| 1972145       | 1972145 | 1858394 | c.?       | p.E542K  | Substitution - Missense |                       |
| 1698506       | 1698506 | 1606624 | c.3140A>G | p.H1047R | Substitution - Missense | 3:178952085-178952085 |
| 1703786       | 1703786 | 1611895 | c.3140A>T | p.H1047L | Substitution - Missense | 3:178952085-178952085 |
| 1972456       | 1972456 | 1858705 | c.?       | p.H1047R | Substitution - Missense |                       |
| 1522786       | 1522786 | 1445158 | c.1624G>A | p.E542K  | Substitution - Missense | 3:178936082-178936082 |
| 1675751       | 1675751 | 1588622 | c.3140A>G | p.H1047R | Substitution - Missense | 3:178952085-178952085 |
| 1972410       | 1972410 | 1858659 | c.?       | p.H1047R | Substitution - Missense |                       |
| 1972255       | 1972255 | 1858504 | c.?       | p.E545K  | Substitution - Missense |                       |
| 1244866       | 1244866 | 1156572 | c.3140A>G | p.H1047R | Substitution - Missense | 3:178952085-178952085 |
| 1135860       | 1135860 | 1048424 | c.3140A>G | p.H1047R | Substitution - Missense | 3:178952085-178952085 |
| 1435076       | 1435076 | 1344434 | c.?       | p.H1047R | Substitution - Missense |                       |
| 107085        | 1520540 | 1442915 | c.3140A>G | p.H1047R | Substitution - Missense | 3:178952085-178952085 |
| 1244946       | 1244946 | 1156652 | c.3140A>G | p.H1047R | Substitution - Missense | 3:178952085-178952085 |
| 1329823       | 1329823 | 1240308 | c.3140A>G | p.H1047R | Substitution - Missense | 3:178952085-178952085 |
| 1659241       | 1659241 | 1573571 | c.3120G>A | p.M1040I | Substitution - Missense | 3:178952065-178952065 |
| CGA-A2-A0D3-0 | 1899616 | 1788300 | c.3140A>G | p.H1047R | Substitution - Missense | 3:178952085-178952085 |
| 1212757       | 1212757 | 1124624 | c.3140A>G | p.H1047R | Substitution - Missense | 3:178952085-178952085 |
| 1301958       | 1301958 | 1213009 | c.3140A>G | p.H1047R | Substitution - Missense | 3:178952085-178952085 |
| 2042658       | 2042658 | 1923776 | c.1633G>A | p.E545K  | Substitution - Missense | 3:178936091-178936091 |
| 1419260       | 1419260 | 1329301 | c.1633G>A | p.E545K  | Substitution - Missense | 3:178936091-178936091 |
| 1134425       | 1134425 | 1047085 | c.1624G>A | p.E542K  | Substitution - Missense | 3:178936082-178936082 |
| 1972531       | 1972531 | 1858780 | c.?       | p.H1047R | Substitution - Missense |                       |
| 108752        | 1520594 | 1442969 | c.3140A>G | p.H1047R | Substitution - Missense | 3:178952085-178952085 |
| PD3905a       | 1230729 | 1142532 | c.1624G>A | p.E542K  | Substitution - Missense | 3:178936082-178936082 |
| 1972512       | 1972512 | 1858761 | c.?       | p.H1047R | Substitution - Missense |                       |
| 1329816       | 1329816 | 1240301 | c.1633G>A | p.E545K  | Substitution - Missense | 3:178936091-178936091 |
| 1972427       | 1972427 | 1858676 | c.?       | p.H1047R | Substitution - Missense |                       |
| BC122         | 1281088 | 1192379 | c.?       | p.H1047R | Substitution - Missense |                       |
| 1135828       | 1135828 | 1048392 | c.3140A>G | p.H1047R | Substitution - Missense | 3:178952085-178952085 |
| 904409        | 904409  | 821954  | c.1258T>C | p.C420R  | Substitution - Missense | 3:178927980-178927980 |
| 1017982       | 1017982 | 935140  | c.1637A>G | p.Q546R  | Substitution - Missense | 3:178936095-178936095 |
| CGA-BH-A0EE-0 | 1899929 | 1788613 | c.2296C>T | p.L766F  | Substitution - Missense | 3:178942489-178942489 |
| BC29          | 1280995 | 1192286 | c.?       | p.E545K  | Substitution - Missense |                       |
| 1329600       | 1329600 | 1240085 | c.3140A>G | p.H1047R | Substitution - Missense | 3:178952085-178952085 |
| CGA-C8-A274-0 | 1900033 | 1788717 | c.3140A>G | p.H1047R | Substitution - Missense | 3:178952085-178952085 |
| CGA-B6-A0WW-C | 1899869 | 1788553 | c.3140A>G | p.H1047R | Substitution - Missense | 3:178952085-178952085 |

|               |         |         |           |          |                         |                       |
|---------------|---------|---------|-----------|----------|-------------------------|-----------------------|
| 1972276       | 1972276 | 1858525 | c.?       | p.E545K  | Substitution - Missense |                       |
| 2042636       | 2042636 | 1923754 | c.1624G>A | p.E542K  | Substitution - Missense | 3:178936082-178936082 |
| 1443612       | 1443612 | 1367857 | c.?       | p.H1047R | Substitution - Missense |                       |
| 1443963       | 1443963 | 1368208 | c.?       | p.H1047R | Substitution - Missense |                       |
| 1972432       | 1972432 | 1858681 | c.?       | p.H1047R | Substitution - Missense |                       |
| 1882744       | 1882744 | 1772864 | c.3140A>G | p.H1047R | Substitution - Missense | 3:178952085-178952085 |
| 1018385       | 1018385 | 935543  | c.3140A>G | p.H1047R | Substitution - Missense | 3:178952085-178952085 |
| 1530102       | 1530102 | 1452474 | c.3140A>G | p.H1047R | Substitution - Missense | 3:178952085-178952085 |
| 1972407       | 1972407 | 1858656 | c.?       | p.H1047R | Substitution - Missense |                       |
| CGA-E2-A14V-0 | 1900119 | 1788803 | c.3130A>T | p.N1044Y | Substitution - Missense | 3:178952075-178952075 |
| 1738914       | 1738914 | 1644745 | c.3140A>G | p.H1047R | Substitution - Missense | 3:178952085-178952085 |
| 1124252       | 1124252 | 1037295 | c.3140A>G | p.H1047R | Substitution - Missense | 3:178952085-178952085 |
| 1301978       | 1301978 | 1213029 | c.3140A>G | p.H1047R | Substitution - Missense | 3:178952085-178952085 |
| 1312250       | 1312250 | 1223159 | c.?       | p.E545K  | Substitution - Missense |                       |
| 1972150       | 1972150 | 1858399 | c.?       | p.E542K  | Substitution - Missense |                       |
| 1972312       | 1972312 | 1858561 | c.?       | p.H1047L | Substitution - Missense |                       |
| 1017189       | 1017189 | 934359  | c.3140A>G | p.H1047R | Substitution - Missense | 3:178952085-178952085 |
| HCC1954       | 1308993 | 1219938 | c.?       | p.H1047R | Substitution - Missense |                       |
| CGA-BH-A0BT-0 | 1899902 | 1788586 | c.1097C>G | p.P366R  | Substitution - Missense | 3:178922328-178922328 |
| CGA-BH-A0BT-0 | 1899902 | 1788586 | c.3140A>G | p.H1047R | Substitution - Missense | 3:178952085-178952085 |
| 1017897       | 1017897 | 935055  | c.3140A>G | p.H1047R | Substitution - Missense | 3:178952085-178952085 |
| 1972502       | 1972502 | 1858751 | c.?       | p.H1047R | Substitution - Missense |                       |
| 1301952       | 1301952 | 1213003 | c.3140A>G | p.H1047R | Substitution - Missense | 3:178952085-178952085 |
| 1244940       | 1244940 | 1156646 | c.3140A>G | p.H1047R | Substitution - Missense | 3:178952085-178952085 |
| 1244897       | 1244897 | 1156603 | c.3140A>G | p.H1047R | Substitution - Missense | 3:178952085-178952085 |
| 1329909       | 1329909 | 1240394 | c.3140A>G | p.H1047R | Substitution - Missense | 3:178952085-178952085 |
| 2067950       | 2067950 | 1947743 | c.?       | p.H1047R | Substitution - Missense |                       |
| 1972439       | 1972439 | 1858688 | c.?       | p.H1047R | Substitution - Missense |                       |
| 1244950       | 1244950 | 1156656 | c.3140A>G | p.H1047R | Substitution - Missense | 3:178952085-178952085 |
| CGA-A8-A06Q-0 | 1779335 | 1683334 | c.3140A>G | p.H1047R | Substitution - Missense | 3:178952085-178952085 |
| 1329572       | 1329572 | 1240057 | c.1633G>A | p.E545K  | Substitution - Missense | 3:178936091-178936091 |
| 1443955       | 1443955 | 1368200 | c.?       | p.H1047R | Substitution - Missense |                       |
| 1972345       | 1972345 | 1858594 | c.?       | p.H1047L | Substitution - Missense |                       |
| HCC1954       | 1136367 | 1048931 | c.3140A>G | p.H1047R | Substitution - Missense | 3:178952085-178952085 |
| 1017183       | 1017183 | 934353  | c.1633G>A | p.E545K  | Substitution - Missense | 3:178936091-178936091 |
| 1675735       | 1675735 | 1588614 | c.1633G>A | p.E545K  | Substitution - Missense | 3:178936091-178936091 |
| 99797         | 1520436 | 1442811 | c.3140A>T | p.H1047L | Substitution - Missense | 3:178952085-178952085 |
| CGA-A8-A07B-0 | 1899677 | 1788361 | c.3140A>G | p.H1047R | Substitution - Missense | 3:178952085-178952085 |
| CGA-AO-A03N-0 | 1899770 | 1788454 | c.1624G>A | p.E542K  | Substitution - Missense | 3:178936082-178936082 |
| CGA-EW-A2FV-C | 2187747 | 2056025 | c.3140A>G | p.H1047R | Substitution - Missense | 3:178952085-178952085 |
| CGA-AO-A1KR-C | 1899799 | 1788483 | c.3140A>G | p.H1047R | Substitution - Missense | 3:178952085-178952085 |
| CGA-AO-A1KR-C | 1899799 | 1788483 | c.3012G>A | p.M1004I | Substitution - Missense | 3:178951957-178951957 |
| 1972249       | 1972249 | 1858498 | c.?       | p.E545K  | Substitution - Missense |                       |



|         |         |         |           |          |                              |                       |
|---------|---------|---------|-----------|----------|------------------------------|-----------------------|
| 1017184 | 1017184 | 934354  | c.1633G>A | p.E545K  | Substitution - Missense      | 3:178936091-178936091 |
| 904401  | 904401  | 821946  | c.1633G>A | p.E545K  | Substitution - Missense      | 3:178936091-178936091 |
| 904401  | 904401  | 821946  | c.3073A>T | p.T1025S | Substitution - Missense      | 3:178952018-178952018 |
| 1244802 | 1244802 | 1156508 | c.1624G>A | p.E542K  | Substitution - Missense      | 3:178936082-178936082 |
| 1972511 | 1972511 | 1858760 | c.?       | p.H1047R | Substitution - Missense      |                       |
| 1329597 | 1329597 | 1240082 | c.3140A>G | p.H1047R | Substitution - Missense      | 3:178952085-178952085 |
| 1329754 | 1329754 | 1240239 | c.3146G>C | p.G1049A | Substitution - Missense      | 3:178952091-178952091 |
| 1193527 | 1193527 | 1105423 | c.?       | p.H1047R | Substitution - Missense      |                       |
| 1018916 | 1018916 | 935939  | c.1633G>A | p.E545K  | Substitution - Missense      | 3:178936091-178936091 |
| 2067932 | 2067932 | 1947725 | c.?       | p.N345K  | Substitution - Missense      |                       |
| 2042667 | 2042667 | 1923785 | c.3140A>G | p.H1047R | Substitution - Missense      | 3:178952085-178952085 |
| 1530109 | 1530109 | 1452481 | c.1633G>A | p.E545K  | Substitution - Missense      | 3:178936091-178936091 |
| 2042654 | 2042654 | 1923772 | c.3140A>G | p.H1047R | Substitution - Missense      | 3:178952085-178952085 |
| 904422  | 904422  | 821967  | c.1633G>A | p.E545K  | Substitution - Missense      | 3:178936091-178936091 |
| 1244877 | 1244877 | 1156583 | c.3140A>G | p.H1047R | Substitution - Missense      | 3:178952085-178952085 |
| 1972148 | 1972148 | 1858397 | c.?       | p.E542K  | Substitution - Missense      |                       |
| 1244829 | 1244829 | 1156535 | c.1633G>A | p.E545K  | Substitution - Missense      | 3:178936091-178936091 |
| 1425162 | 1425162 | 1335190 | c.?       | p.H1047R | Substitution - Missense      |                       |
| 1972152 | 1972152 | 1858401 | c.?       | p.E542K  | Substitution - Missense      |                       |
| 1676272 | 1676272 | 1589044 | c.?       | p.H1047R | Substitution - Missense      |                       |
| 1443952 | 1443952 | 1368197 | c.?       | p.H1047R | Substitution - Missense      |                       |
| 1297155 | 1297155 | 1208209 | c.?       | p.H1047L | Substitution - Missense      |                       |
| 1972477 | 1972477 | 1858726 | c.?       | p.H1047R | Substitution - Missense      |                       |
| 1443738 | 1443738 | 1367983 | c.?       | p.H1047R | Substitution - Missense      |                       |
| 1698844 | 1698844 | 1606962 | c.?       | p.E545K  | Substitution - Missense      |                       |
| 1703724 | 1703724 | 1611833 | c.1624G>A | p.E542K  | Substitution - Missense      | 3:178936082-178936082 |
| 1135800 | 1135800 | 1048364 | c.3140A>G | p.H1047R | Substitution - Missense      | 3:178952085-178952085 |
| 1017176 | 1017176 | 934346  | c.1624G>A | p.E542K  | Substitution - Missense      | 3:178936082-178936082 |
| 1124233 | 1124233 | 1037276 | c.1258T>C | p.C420R  | Substitution - Missense      | 3:178927980-178927980 |
| 2131987 | 2131987 | 2006050 | c.?       | p.E545K  | Substitution - Missense      |                       |
| 1972522 | 1972522 | 1858771 | c.?       | p.H1047R | Substitution - Missense      |                       |
| 1972267 | 1972267 | 1858516 | c.?       | p.E545K  | Substitution - Missense      |                       |
| 1329815 | 1329815 | 1240300 | c.1633G>A | p.E545K  | Substitution - Missense      | 3:178936091-178936091 |
| 1018910 | 1018910 | 935933  | c.3075C>T | p.T1025T | Substitution - coding silent | 3:178952020-178952020 |
| 904446  | 904446  | 821991  | c.3140A>G | p.H1047R | Substitution - Missense      | 3:178952085-178952085 |
| 103828  | 1520502 | 1442877 | c.3140A>G | p.H1047R | Substitution - Missense      | 3:178952085-178952085 |
| HCC202  | 1136360 | 1048924 | c.1633G>A | p.E545K  | Substitution - Missense      | 3:178936091-178936091 |
| 2053350 | 2053350 | 1933596 | c.?       | p.E545K  | Substitution - Missense      |                       |
| 1972547 | 1972547 | 1858796 | c.?       | p.H1047R | Substitution - Missense      |                       |
| 1972530 | 1972530 | 1858779 | c.?       | p.H1047R | Substitution - Missense      |                       |
| 1698862 | 1698862 | 1606980 | c.3140A>G | p.H1047R | Substitution - Missense      | 3:178952085-178952085 |
| 1124181 | 1124181 | 1037224 | c.3140A>G | p.H1047R | Substitution - Missense      | 3:178952085-178952085 |
| 904430  | 904430  | 821975  | c.1633G>A | p.E545K  | Substitution - Missense      | 3:178936091-178936091 |

|               |         |         |                   |           |                             |                       |
|---------------|---------|---------|-------------------|-----------|-----------------------------|-----------------------|
| 1972513       | 1972513 | 1858762 | c.?               | p.H1047R  | Substitution - Missense     |                       |
| CGA-BH-A0BV-0 | 1899903 | 1788587 | c.1633G>A         | p.E545K   | Substitution - Missense     | 3:178936091-178936091 |
| 1972284       | 1972284 | 1858533 | c.?               | p.E545K   | Substitution - Missense     |                       |
| 1698866       | 1698866 | 1606984 | c.3140A>G         | p.H1047R  | Substitution - Missense     | 3:178952085-178952085 |
| 1329831       | 1329831 | 1240316 | c.3140A>G         | p.H1047R  | Substitution - Missense     | 3:178952085-178952085 |
| E40054        | 894106  | 811874  | c.1633G>A         | p.E545K   | Substitution - Missense     | 3:178936091-178936091 |
| CGA-BH-A0B0-0 | 1899883 | 1788567 | c.1633G>A         | p.E545K   | Substitution - Missense     | 3:178936091-178936091 |
| 1134434       | 1134434 | 1047094 | c.1637A>G         | p.Q546R   | Substitution - Missense     | 3:178936095-178936095 |
| 1691745       | 1691745 | 1600011 | c.?               | p.H1047R  | Substitution - Missense     |                       |
| 1972457       | 1972457 | 1858706 | c.?               | p.H1047R  | Substitution - Missense     |                       |
| 1321148       | 1321148 | 1232035 | c.3140A>G         | p.H1047R  | Substitution - Missense     | 3:178952085-178952085 |
| 1882750       | 1882750 | 1772870 | c.3140A>G         | p.H1047R  | Substitution - Missense     | 3:178952085-178952085 |
| CGA-D8-A1JH-0 | 1900054 | 1788738 | c.3140A>G         | p.H1047R  | Substitution - Missense     | 3:178952085-178952085 |
| 1972240       | 1972240 | 1858489 | c.?               | p.E545K   | Substitution - Missense     |                       |
| 2107721       | 2107721 | 1985582 | c.1624G>A         | p.E542K   | Substitution - Missense     | 3:178936082-178936082 |
| SUM102PT      | 1289410 | 1200685 | c.3140A>G         | p.H1047R  | Substitution - Missense     | 3:178952085-178952085 |
| 1657036       | 1657036 | 1571691 | c.3140A>G         | p.H1047R  | Substitution - Missense     | 3:178952085-178952085 |
| CGA-E2-A15E-0 | 1900137 | 1788821 | c.3140A>G         | p.H1047R  | Substitution - Missense     | 3:178952085-178952085 |
| 1124418       | 1124418 | 1037461 | c.3140A>G         | p.H1047R  | Substitution - Missense     | 3:178952085-178952085 |
| 1135811       | 1135811 | 1048375 | c.3140A>G         | p.H1047R  | Substitution - Missense     | 3:178952085-178952085 |
| 1244880       | 1244880 | 1156586 | c.3140A>G         | p.H1047R  | Substitution - Missense     | 3:178952085-178952085 |
| 1670202       | 1670202 | 1583488 | c.3140A>G         | p.H1047R  | Substitution - Missense     | 3:178952085-178952085 |
| 1972176       | 1972176 | 1858425 | c.?               | p.E542K   | Substitution - Missense     |                       |
| 1972517       | 1972517 | 1858766 | c.?               | p.H1047R  | Substitution - Missense     |                       |
| 1972469       | 1972469 | 1858718 | c.?               | p.H1047R  | Substitution - Missense     |                       |
| CGA-A2-A0EV-0 | 1899623 | 1788307 | c.3140A>G         | p.H1047R  | Substitution - Missense     | 3:178952085-178952085 |
| CGA-A2-A0EV-0 | 1899623 | 1788307 | c.1405_1406insATA | p.E469>DK | Complex - insertion inframe | 3:178928219-178928220 |
| CGA-E2-A15C-0 | 1900134 | 1788818 | c.3140A>G         | p.H1047R  | Substitution - Missense     | 3:178952085-178952085 |
| 1193507       | 1193507 | 1105403 | c.?               | p.H1047R  | Substitution - Missense     |                       |
| 1698873       | 1698873 | 1606991 | c.3140A>G         | p.H1047R  | Substitution - Missense     | 3:178952085-178952085 |
| MCF-7         | 1018463 | 935621  | c.1633G>A         | p.E545K   | Substitution - Missense     | 3:178936091-178936091 |
| 1698519       | 1698519 | 1606637 | c.1634A>C         | p.E545A   | Substitution - Missense     | 3:178936092-178936092 |
| 1972504       | 1972504 | 1858753 | c.?               | p.H1047R  | Substitution - Missense     |                       |
| 1738913       | 1738913 | 1644744 | c.3140A>G         | p.H1047R  | Substitution - Missense     | 3:178952085-178952085 |
| E40062        | 894114  | 811882  | c.1633G>A         | p.E545K   | Substitution - Missense     | 3:178936091-178936091 |
| 1972209       | 1972209 | 1858458 | c.?               | p.E545K   | Substitution - Missense     |                       |
| 1691709       | 1691709 | 1599975 | c.?               | p.H1047R  | Substitution - Missense     |                       |
| 1244912       | 1244912 | 1156618 | c.3140A>G         | p.H1047R  | Substitution - Missense     | 3:178952085-178952085 |
| SA056         | 1659940 | 1574268 | c.3140A>G         | p.H1047R  | Substitution - Missense     | 3:178952085-178952085 |
| 1972216       | 1972216 | 1858465 | c.?               | p.E545K   | Substitution - Missense     |                       |
| 904457        | 904457  | 822002  | c.3140A>G         | p.H1047R  | Substitution - Missense     | 3:178952085-178952085 |
| 1212764       | 1212764 | 1124631 | c.3140A>G         | p.H1047R  | Substitution - Missense     | 3:178952085-178952085 |
| 1135817       | 1135817 | 1048381 | c.3140A>G         | p.H1047R  | Substitution - Missense     | 3:178952085-178952085 |

|               |         |         |           |          |                         |                       |
|---------------|---------|---------|-----------|----------|-------------------------|-----------------------|
| 1419263       | 1419263 | 1329304 | c.1633G>A | p.E545K  | Substitution - Missense | 3:178936091-178936091 |
| 1972171       | 1972171 | 1858420 | c.?       | p.E542K  | Substitution - Missense |                       |
| 1244919       | 1244919 | 1156625 | c.3140A>G | p.H1047R | Substitution - Missense | 3:178952085-178952085 |
| E40046        | 894098  | 811866  | c.1258T>C | p.C420R  | Substitution - Missense | 3:178927980-178927980 |
| 1443605       | 1443605 | 1367850 | c.?       | p.H1047R | Substitution - Missense |                       |
| CGA-E9-A1NH-0 | 1900194 | 1788878 | c.3140A>G | p.H1047R | Substitution - Missense | 3:178952085-178952085 |
| 1703747       | 1703747 | 1611856 | c.1633G>A | p.E545K  | Substitution - Missense | 3:178936091-178936091 |
| 1972485       | 1972485 | 1858734 | c.?       | p.H1047R | Substitution - Missense |                       |
| 1972449       | 1972449 | 1858698 | c.?       | p.H1047R | Substitution - Missense |                       |
| 1835036       | 1835036 | 1730068 | c.?       | p.H1047R | Substitution - Missense |                       |
| CGA-A8-A07Z-0 | 1899689 | 1788373 | c.3140A>G | p.H1047R | Substitution - Missense | 3:178952085-178952085 |
| 1698507       | 1698507 | 1606625 | c.1634A>C | p.E545A  | Substitution - Missense | 3:178936092-178936092 |
| MCF-7         | 1017161 | 934331  | c.1633G>A | p.E545K  | Substitution - Missense | 3:178936091-178936091 |
| 101055        | 1520465 | 1442840 | c.3140A>T | p.H1047L | Substitution - Missense | 3:178952085-178952085 |
| 1017191       | 1017191 | 934361  | c.3140A>G | p.H1047R | Substitution - Missense | 3:178952085-178952085 |
| 1670315       | 1670315 | 1583601 | c.3140A>G | p.H1047R | Substitution - Missense | 3:178952085-178952085 |
| 1321120       | 1321120 | 1232007 | c.1633G>A | p.E545K  | Substitution - Missense | 3:178936091-178936091 |
| 1193565       | 1193565 | 1105461 | c.?       | p.E545K  | Substitution - Missense |                       |
| CGA-A2-A0CS-0 | 1899610 | 1788294 | c.3140A>G | p.H1047R | Substitution - Missense | 3:178952085-178952085 |
| CGA-AO-A0JA-0 | 1899777 | 1788461 | c.1624G>A | p.E542K  | Substitution - Missense | 3:178936082-178936082 |
| CGA-B6-A1KI-0 | 1899876 | 1788560 | c.1637A>C | p.Q546P  | Substitution - Missense | 3:178936095-178936095 |
| 1972380       | 1972380 | 1858629 | c.?       | p.H1047R | Substitution - Missense |                       |
| 1193539       | 1193539 | 1105435 | c.?       | p.H1047R | Substitution - Missense |                       |
| 1135875       | 1135875 | 1048439 | c.1633G>A | p.E545K  | Substitution - Missense | 3:178936091-178936091 |
| E40070        | 894122  | 811890  | c.3140A>T | p.H1047L | Substitution - Missense | 3:178952085-178952085 |
| 1244813       | 1244813 | 1156519 | c.1633G>A | p.E545K  | Substitution - Missense | 3:178936091-178936091 |
| 1321146       | 1321146 | 1232033 | c.3140A>G | p.H1047R | Substitution - Missense | 3:178952085-178952085 |
| 1244812       | 1244812 | 1156518 | c.1633G>A | p.E545K  | Substitution - Missense | 3:178936091-178936091 |
| 1244913       | 1244913 | 1156619 | c.3140A>G | p.H1047R | Substitution - Missense | 3:178952085-178952085 |
| 1329602       | 1329602 | 1240087 | c.3140A>G | p.H1047R | Substitution - Missense | 3:178952085-178952085 |
| 1329603       | 1329603 | 1240088 | c.3140A>G | p.H1047R | Substitution - Missense | 3:178952085-178952085 |
| 1124603       | 1124603 | 1037646 | c.3140A>G | p.H1047R | Substitution - Missense | 3:178952085-178952085 |
| 1244846       | 1244846 | 1156552 | c.1634A>G | p.E545G  | Substitution - Missense | 3:178936092-178936092 |
| 1134441       | 1134441 | 1047101 | c.1625A>T | p.E542V  | Substitution - Missense | 3:178936083-178936083 |
| 1972558       | 1972558 | 1858807 | c.?       | p.H1047R | Substitution - Missense |                       |
| 1670211       | 1670211 | 1583497 | c.3140A>G | p.H1047R | Substitution - Missense | 3:178952085-178952085 |
| 1244845       | 1244845 | 1156551 | c.1633G>C | p.E545Q  | Substitution - Missense | 3:178936091-178936091 |
| 1017177       | 1017177 | 934347  | c.1624G>A | p.E542K  | Substitution - Missense | 3:178936082-178936082 |
| 904467        | 904467  | 822012  | c.3140A>G | p.H1047R | Substitution - Missense | 3:178952085-178952085 |
| 1676210       | 1676210 | 1588982 | c.?       | p.E545K  | Substitution - Missense |                       |
| 904447        | 904447  | 821992  | c.3140A>G | p.H1047R | Substitution - Missense | 3:178952085-178952085 |
| 1135884       | 1135884 | 1048448 | c.1633G>A | p.E545K  | Substitution - Missense | 3:178936091-178936091 |
| 1124409       | 1124409 | 1037452 | c.3140A>G | p.H1047R | Substitution - Missense | 3:178952085-178952085 |

|               |         |         |           |          |                         |                       |
|---------------|---------|---------|-----------|----------|-------------------------|-----------------------|
| 1124412       | 1124412 | 1037455 | c.3140A>G | p.H1047R | Substitution - Missense | 3:178952085-178952085 |
| 1972556       | 1972556 | 1858805 | c.?       | p.H1047R | Substitution - Missense |                       |
| 1312244       | 1312244 | 1223153 | c.?       | p.H1047R | Substitution - Missense |                       |
| BT474         | 1018460 | 935618  | c.333G>C  | p.K111N  | Substitution - Missense | 3:178916946-178916946 |
| BT-474        | 1046934 | 963165  | c.333G>C  | p.K111N  | Substitution - Missense | 3:178916946-178916946 |
| 1329837       | 1329837 | 1240322 | c.3068G>T | p.R1023L | Substitution - Missense | 3:178952013-178952013 |
| 1972555       | 1972555 | 1858804 | c.?       | p.H1047R | Substitution - Missense |                       |
| 1124247       | 1124247 | 1037290 | c.1636C>G | p.Q546E  | Substitution - Missense | 3:178936094-178936094 |
| 1972376       | 1972376 | 1858625 | c.?       | p.H1047R | Substitution - Missense |                       |
| 1972382       | 1972382 | 1858631 | c.?       | p.H1047R | Substitution - Missense |                       |
| 2047123       | 2047123 | 1927405 | c.?       | p.H1047R | Substitution - Missense |                       |
| 1329829       | 1329829 | 1240314 | c.3140A>G | p.H1047R | Substitution - Missense | 3:178952085-178952085 |
| 901511        | 901511  | 819123  | c.3140A>G | p.H1047R | Substitution - Missense | 3:178952085-178952085 |
| 1738928       | 1738928 | 1644759 | c.3073A>K | p.T1025? | Substitution - Missense | 3:178952018-178952018 |
| 1675742       | 1675742 | 1588617 | c.3140A>G | p.H1047R | Substitution - Missense | 3:178952085-178952085 |
| 1703836       | 1703836 | 1611945 | c.3140A>G | p.H1047R | Substitution - Missense | 3:178952085-178952085 |
| 1665034       | 1665034 | 1578484 | c.1618C>T | p.L540F  | Substitution - Missense | 3:178936076-178936076 |
| MCF10DCIS     | 1219447 | 1131290 | c.?       | p.H1047R | Substitution - Missense |                       |
| 1670323       | 1670323 | 1583609 | c.3140A>G | p.H1047R | Substitution - Missense | 3:178952085-178952085 |
| 1419259       | 1419259 | 1329300 | c.1633G>A | p.E545K  | Substitution - Missense | 3:178936091-178936091 |
| 1709241       | 1709241 | 1617147 | c.?       | p.E545K  | Substitution - Missense |                       |
| 1972280       | 1972280 | 1858529 | c.?       | p.E545K  | Substitution - Missense |                       |
| 1193519       | 1193519 | 1105415 | c.?       | p.H1047R | Substitution - Missense |                       |
| 1703752       | 1703752 | 1611861 | c.1633G>A | p.E545K  | Substitution - Missense | 3:178936091-178936091 |
| 1193530       | 1193530 | 1105426 | c.?       | p.H1047R | Substitution - Missense |                       |
| 1698833       | 1698833 | 1606951 | c.?       | p.E542K  | Substitution - Missense |                       |
| 1297103       | 1297103 | 1208157 | c.?       | p.E545K  | Substitution - Missense |                       |
| 1443617       | 1443617 | 1367862 | c.?       | p.H1047R | Substitution - Missense |                       |
| 1864113       | 1864113 | 1754966 | c.?       | p.E542K  | Substitution - Missense |                       |
| 1329599       | 1329599 | 1240084 | c.3140A>G | p.H1047R | Substitution - Missense | 3:178952085-178952085 |
| UACC-893      | 1136362 | 1048926 | c.3140A>G | p.H1047R | Substitution - Missense | 3:178952085-178952085 |
| 1972250       | 1972250 | 1858499 | c.?       | p.E545K  | Substitution - Missense |                       |
| CGA-D8-A1XO-0 | 1900078 | 1788762 | c.1624G>A | p.E542K  | Substitution - Missense | 3:178936082-178936082 |
| 1972519       | 1972519 | 1858768 | c.?       | p.H1047R | Substitution - Missense |                       |
| 1972205       | 1972205 | 1858454 | c.?       | p.E545K  | Substitution - Missense |                       |
| BT-20         | 1046932 | 963163  | c.1616C>G | p.P539R  | Substitution - Missense | 3:178936074-178936074 |
| 1691706       | 1691706 | 1599972 | c.?       | p.H1047R | Substitution - Missense |                       |
| BT-20         | 1046932 | 963163  | c.3140A>G | p.H1047R | Substitution - Missense | 3:178952085-178952085 |
| 1244763       | 1244763 | 1156469 | c.1035T>A | p.N345K  | Substitution - Missense | 3:178921553-178921553 |
| 1972194       | 1972194 | 1858443 | c.?       | p.E542K  | Substitution - Missense |                       |
| 1709206       | 1709206 | 1617112 | c.?       | p.H1047L | Substitution - Missense |                       |
| 1135852       | 1135852 | 1048416 | c.3140A>G | p.H1047R | Substitution - Missense | 3:178952085-178952085 |
| 904427        | 904427  | 821972  | c.1633G>A | p.E545K  | Substitution - Missense | 3:178936091-178936091 |

|                |         |         |           |          |                         |                       |
|----------------|---------|---------|-----------|----------|-------------------------|-----------------------|
| 1972194        | 1972194 | 1858443 | c.?       | p.E545K  | Substitution - Missense |                       |
| 1972170        | 1972170 | 1858419 | c.?       | p.E542K  | Substitution - Missense |                       |
| 1972184        | 1972184 | 1858433 | c.?       | p.E542K  | Substitution - Missense |                       |
| 1301945        | 1301945 | 1212996 | c.3074C>T | p.T1025I | Substitution - Missense | 3:178952019-178952019 |
| 1124407        | 1124407 | 1037450 | c.3140A>G | p.H1047R | Substitution - Missense | 3:178952085-178952085 |
| 1244876        | 1244876 | 1156582 | c.3140A>G | p.H1047R | Substitution - Missense | 3:178952085-178952085 |
| 1675738        | 1675738 | 1588615 | c.1633G>A | p.E545K  | Substitution - Missense | 3:178936091-178936091 |
| 1419258        | 1419258 | 1329299 | c.1633G>A | p.E545K  | Substitution - Missense | 3:178936091-178936091 |
| 1135807        | 1135807 | 1048371 | c.3140A>G | p.H1047R | Substitution - Missense | 3:178952085-178952085 |
| 1124265        | 1124265 | 1037308 | c.3140A>G | p.H1047R | Substitution - Missense | 3:178952085-178952085 |
| 1017181        | 1017181 | 934351  | c.1633G>A | p.E545K  | Substitution - Missense | 3:178936091-178936091 |
| 1135844        | 1135844 | 1048408 | c.3140A>G | p.H1047R | Substitution - Missense | 3:178952085-178952085 |
| 901504         | 901504  | 819116  | c.3140A>G | p.H1047R | Substitution - Missense | 3:178952085-178952085 |
| 1972470        | 1972470 | 1858719 | c.?       | p.H1047R | Substitution - Missense |                       |
| 1972402        | 1972402 | 1858651 | c.?       | p.H1047R | Substitution - Missense |                       |
| 1244921        | 1244921 | 1156627 | c.3140A>G | p.H1047R | Substitution - Missense | 3:178952085-178952085 |
| 1017835        | 1017835 | 934993  | c.1624G>A | p.E542K  | Substitution - Missense | 3:178936082-178936082 |
| 1193388        | 1193388 | 1105284 | c.1598C>T | p.A533V  | Substitution - Missense | 3:178936056-178936056 |
| 1017190        | 1017190 | 934360  | c.3140A>G | p.H1047R | Substitution - Missense | 3:178952085-178952085 |
| 1124420        | 1124420 | 1037463 | c.3140A>G | p.H1047R | Substitution - Missense | 3:178952085-178952085 |
| 1703799        | 1703799 | 1611908 | c.3140A>G | p.H1047R | Substitution - Missense | 3:178952085-178952085 |
| 1691733        | 1691733 | 1599999 | c.?       | p.H1047R | Substitution - Missense |                       |
| 1972443        | 1972443 | 1858692 | c.?       | p.H1047R | Substitution - Missense |                       |
| 1244908        | 1244908 | 1156614 | c.3140A>G | p.H1047R | Substitution - Missense | 3:178952085-178952085 |
| 1703795        | 1703795 | 1611904 | c.3140A>G | p.H1047R | Substitution - Missense | 3:178952085-178952085 |
| MDA-MB-468     | 1018467 | 935625  | c.1634A>C | p.E545A  | Substitution - Missense | 3:178936092-178936092 |
| MDA-MB-361     | 1018464 | 935622  | c.1633G>A | p.E545K  | Substitution - Missense | 3:178936091-178936091 |
| TCGA-C8-A278-0 | 1900035 | 1788719 | c.3140A>T | p.H1047L | Substitution - Missense | 3:178952085-178952085 |
| TCGA-C8-A278-0 | 1900035 | 1788719 | c.3118A>G | p.M1040V | Substitution - Missense | 3:178952063-178952063 |
| 1972149        | 1972149 | 1858398 | c.?       | p.E542K  | Substitution - Missense |                       |
| 1244882        | 1244882 | 1156588 | c.3140A>G | p.H1047R | Substitution - Missense | 3:178952085-178952085 |
| CGA-EW-A1P0-0  | 1900244 | 1788928 | c.2816A>G | p.D939G  | Substitution - Missense | 3:178948044-178948044 |
| 1329835        | 1329835 | 1240320 | c.3140A>T | p.H1047L | Substitution - Missense | 3:178952085-178952085 |
| 1124398        | 1124398 | 1037441 | c.1633G>A | p.E545K  | Substitution - Missense | 3:178936091-178936091 |
| TCGA-E2-A1B4-0 | 1900155 | 1788839 | c.1624G>A | p.E542K  | Substitution - Missense | 3:178936082-178936082 |
| 1124267        | 1124267 | 1037310 | c.3139C>T | p.H1047Y | Substitution - Missense | 3:178952084-178952084 |
| 1124267        | 1124267 | 1037310 | c.?       | p.H1048L | Substitution - Missense |                       |
| 1972418        | 1972418 | 1858667 | c.?       | p.H1047R | Substitution - Missense |                       |
| 1244902        | 1244902 | 1156608 | c.3140A>G | p.H1047R | Substitution - Missense | 3:178952085-178952085 |
| CGA-AO-A03M-C  | 2187822 | 2056100 | c.3140A>G | p.H1047R | Substitution - Missense | 3:178952085-178952085 |
| TCGA-E2-A11N-0 | 1900168 | 1788852 | c.2702G>T | p.C901F  | Substitution - Missense | 3:178947827-178947827 |
| 1244861        | 1244861 | 1156567 | c.3140A>T | p.H1047L | Substitution - Missense | 3:178952085-178952085 |
| 1670196        | 1670196 | 1583482 | c.1624G>A | p.E542K  | Substitution - Missense | 3:178936082-178936082 |

|                |         |         |                 |             |                              |                       |
|----------------|---------|---------|-----------------|-------------|------------------------------|-----------------------|
| TCGA-E2-A1IN-0 | 1900168 | 1788852 | c.1624G>A       | p.E542K     | Substitution - Missense      | 3:178936082-178936082 |
| TCGA-A2-A25A-0 | 1899646 | 1788330 | c.1624G>A       | p.E542K     | Substitution - Missense      | 3:178936082-178936082 |
| TCGA-A8-A08B-0 | 1899697 | 1788381 | c.1633G>A       | p.E545K     | Substitution - Missense      | 3:178936091-178936091 |
| TCGA-D8-A1Y1-0 | 1900088 | 1788772 | c.1624G>A       | p.E542K     | Substitution - Missense      | 3:178936082-178936082 |
| TCGA-D8-A1Y1-0 | 1900088 | 1788772 | c.210C>T        | p.F70F      | Substitution - coding silent | 3:178916823-178916823 |
| TCGA-GM-A2DI-0 | 2187733 | 2056011 | c.1624G>A       | p.E542K     | Substitution - Missense      | 3:178936082-178936082 |
|                | 1193501 | 1193501 | c.?             | p.H1047R    | Substitution - Missense      |                       |
|                | 1443710 | 1443710 | c.?             | p.H1047R    | Substitution - Missense      |                       |
|                | 1972321 | 1972321 | c.?             | p.H1047L    | Substitution - Missense      |                       |
|                | 1703862 | 1703862 | c.3140A>G       | p.H1047R    | Substitution - Missense      | 3:178952085-178952085 |
|                | 1124417 | 1124417 | c.3140A>G       | p.H1047R    | Substitution - Missense      | 3:178952085-178952085 |
|                | 1670319 | 1670319 | c.3140A>G       | p.H1047R    | Substitution - Missense      | 3:178952085-178952085 |
|                | 901520  | 901520  | c.3140A>G       | p.H1047R    | Substitution - Missense      | 3:178952085-178952085 |
|                | 1018404 | 1018404 | c.1634A>C       | p.E545A     | Substitution - Missense      | 3:178936092-178936092 |
|                | 1443619 | 1443619 | c.?             | p.H1047R    | Substitution - Missense      |                       |
|                | 1329820 | 1329820 | c.3140A>G       | p.H1047R    | Substitution - Missense      | 3:178952085-178952085 |
| MDA361         | 1017160 | 934330  | c.1633G>A       | p.E545K     | Substitution - Missense      | 3:178936091-178936091 |
|                | 1443744 | 1443744 | c.?             | p.H1047R    | Substitution - Missense      |                       |
|                | 1135842 | 1135842 | c.3140A>G       | p.H1047R    | Substitution - Missense      | 3:178952085-178952085 |
|                | 1443743 | 1443743 | c.?             | p.H1047R    | Substitution - Missense      |                       |
|                | 1703783 | 1703783 | c.3203_3204insA | p.N1068fs*5 | Insertion - Frameshift       | 3:178952148-178952149 |
|                | 1244799 | 1244799 | c.1624G>A       | p.E542K     | Substitution - Missense      | 3:178936082-178936082 |
|                | 1670221 | 1670221 | c.3140A>T       | p.H1047L    | Substitution - Missense      | 3:178952085-178952085 |
|                | 1124262 | 1124262 | c.3140A>G       | p.H1047R    | Substitution - Missense      | 3:178952085-178952085 |
|                | 1691696 | 1691696 | c.?             | p.E545K     | Substitution - Missense      |                       |
| MDA-MB-361     | 1136355 | 1048919 | c.1633G>A       | p.E545K     | Substitution - Missense      | 3:178936091-178936091 |
|                | 2067945 | 2067945 | c.?             | p.E545K     | Substitution - Missense      |                       |
|                | 1018384 | 1018384 | c.3140A>G       | p.H1047R    | Substitution - Missense      | 3:178952085-178952085 |
|                | 901500  | 901500  | c.1624G>A       | p.E542K     | Substitution - Missense      | 3:178936082-178936082 |
|                | 1244896 | 1244896 | c.3140A>G       | p.H1047R    | Substitution - Missense      | 3:178952085-178952085 |
|                | 1703798 | 1703798 | c.3140A>G       | p.H1047R    | Substitution - Missense      | 3:178952085-178952085 |
|                | 1657045 | 1657045 | c.3140A>G       | p.H1047R    | Substitution - Missense      | 3:178952085-178952085 |
|                | 1665031 | 1665031 | c.3140A>G       | p.H1047R    | Substitution - Missense      | 3:178952085-178952085 |
|                | 1972315 | 1972315 | c.?             | p.H1047L    | Substitution - Missense      |                       |
|                | 1124126 | 1124126 | c.3140A>G       | p.H1047R    | Substitution - Missense      | 3:178952085-178952085 |
|                | 1443725 | 1443725 | c.?             | p.H1047R    | Substitution - Missense      |                       |
| TCGA-AO-A0J5-0 | 1779457 | 1683456 | c.3140A>G       | p.H1047R    | Substitution - Missense      | 3:178952085-178952085 |
|                | 1703859 | 1703859 | c.3140A>G       | p.H1047R    | Substitution - Missense      | 3:178952085-178952085 |
|                | 1443908 | 1443908 | c.?             | p.H1047R    | Substitution - Missense      |                       |
|                | 1443724 | 1443724 | c.?             | p.H1047R    | Substitution - Missense      |                       |
|                | E40071  | 894123  | c.3140A>T       | p.H1047L    | Substitution - Missense      | 3:178952085-178952085 |
|                | 1124384 | 1124384 | c.1624G>A       | p.E542K     | Substitution - Missense      | 3:178936082-178936082 |
|                | 1297106 | 1297106 | c.?             | p.H1047R    | Substitution - Missense      |                       |

|               |         |         |           |          |                         |                       |
|---------------|---------|---------|-----------|----------|-------------------------|-----------------------|
| 1124413       | 1124413 | 1037456 | c.3140A>G | p.H1047R | Substitution - Missense | 3:178952085-178952085 |
| 2042673       | 2042673 | 1923791 | c.?       | p.?      | Unknown                 |                       |
| 1329743       | 1329743 | 1240228 | c.3140A>G | p.H1047R | Substitution - Missense | 3:178952085-178952085 |
| 904465        | 904465  | 822010  | c.3140A>G | p.H1047R | Substitution - Missense | 3:178952085-178952085 |
| 1124241       | 1124241 | 1037284 | c.1633G>A | p.E545K  | Substitution - Missense | 3:178936091-178936091 |
| 1419265       | 1419265 | 1329306 | c.1624G>A | p.E542K  | Substitution - Missense | 3:178936082-178936082 |
| 1082374       | 1082374 | 997592  | c.93A>G   | p.I31M   | Substitution - Missense | 3:178916706-178916706 |
| CGA-OL-A5RX-0 | 2187698 | 2055976 | c.1097C>G | p.P366R  | Substitution - Missense | 3:178922328-178922328 |
| CGA-OL-A5RX-0 | 2187698 | 2055976 | c.2816A>G | p.D939G  | Substitution - Missense | 3:178948044-178948044 |
| 1972207       | 1972207 | 1858456 | c.?       | p.E545K  | Substitution - Missense |                       |
| 1017902       | 1017902 | 935060  | c.3140A>T | p.H1047L | Substitution - Missense | 3:178952085-178952085 |
| 1193547       | 1193547 | 1105443 | c.3140A>T | p.H1047L | Substitution - Missense | 3:178952085-178952085 |
| 1738896       | 1738896 | 1644727 | c.1624G>A | p.E542K  | Substitution - Missense | 3:178936082-178936082 |
| 2067911       | 2067911 | 1947704 | c.?       | p.H1047R | Substitution - Missense |                       |
| BC96          | 1281062 | 1192353 | c.?       | p.H1047R | Substitution - Missense |                       |
| 1124150       | 1124150 | 1037193 | c.1634A>G | p.E545G  | Substitution - Missense | 3:178936092-178936092 |
| E40050        | 894102  | 811870  | c.1624G>A | p.E542K  | Substitution - Missense | 3:178936082-178936082 |
| CGA-A2-A0D1-0 | 1899615 | 1788299 | c.1624G>A | p.E542K  | Substitution - Missense | 3:178936082-178936082 |
| E39860        | 894071  | 811839  | c.3137C>T | p.A1046V | Substitution - Missense | 3:178952082-178952082 |
| 1835029       | 1835029 | 1730061 | c.?       | p.H1047R | Substitution - Missense |                       |
| 1135794       | 1135794 | 1048358 | c.3140A>G | p.H1047R | Substitution - Missense | 3:178952085-178952085 |
| 1676270       | 1676270 | 1589042 | c.?       | p.E542K  | Substitution - Missense |                       |
| 1124598       | 1124598 | 1037641 | c.3140A>G | p.H1047R | Substitution - Missense | 3:178952085-178952085 |
| CGA-A2-A4RY-0 | 2187878 | 2056156 | c.1633G>A | p.E545K  | Substitution - Missense | 3:178936091-178936091 |
| 1321129       | 1321129 | 1232016 | c.1637A>G | p.Q546R  | Substitution - Missense | 3:178936095-178936095 |
| 1427928       | 1427928 | 1337446 | c.?       | p.H1047R | Substitution - Missense |                       |
| 1972154       | 1972154 | 1858403 | c.?       | p.E542K  | Substitution - Missense |                       |
| 1017832       | 1017832 | 934990  | c.1624G>A | p.E542K  | Substitution - Missense | 3:178936082-178936082 |
| T47D          | 1308999 | 1219944 | c.?       | p.H1047R | Substitution - Missense |                       |
| 1972319       | 1972319 | 1858568 | c.?       | p.H1047L | Substitution - Missense |                       |
| 1738910       | 1738910 | 1644741 | c.3140A>G | p.H1047R | Substitution - Missense | 3:178952085-178952085 |
| SA215         | 1659985 | 1574313 | c.3140A>G | p.H1047R | Substitution - Missense | 3:178952085-178952085 |
| 1972302       | 1972302 | 1858551 | c.?       | p.E545K  | Substitution - Missense |                       |
| 1135903       | 1135903 | 1048467 | c.1624G>A | p.E542K  | Substitution - Missense | 3:178936082-178936082 |
| 1703832       | 1703832 | 1611941 | c.3140A>G | p.H1047R | Substitution - Missense | 3:178952085-178952085 |
| 1124410       | 1124410 | 1037453 | c.3140A>G | p.H1047R | Substitution - Missense | 3:178952085-178952085 |
| CGA-A8-A092-0 | 1899714 | 1788398 | c.3140A>G | p.H1047R | Substitution - Missense | 3:178952085-178952085 |
| 1124176       | 1124176 | 1037219 | c.3145G>C | p.G1049R | Substitution - Missense | 3:178952090-178952090 |
| 1972482       | 1972482 | 1858731 | c.?       | p.H1047R | Substitution - Missense |                       |
| 1675734       | 1675734 | 1588613 | c.1633G>A | p.E545K  | Substitution - Missense | 3:178936091-178936091 |
| CGA-A2-A1G0-0 | 1899641 | 1788325 | c.1624G>A | p.E542K  | Substitution - Missense | 3:178936082-178936082 |
| 1670205       | 1670205 | 1583491 | c.3140A>G | p.H1047R | Substitution - Missense | 3:178952085-178952085 |
| 1135840       | 1135840 | 1048404 | c.3140A>G | p.H1047R | Substitution - Missense | 3:178952085-178952085 |

|               |         |         |           |          |                         |                       |
|---------------|---------|---------|-----------|----------|-------------------------|-----------------------|
| CGA-AN-A0AJ-0 | 1899748 | 1788432 | c.3140A>G | p.H1047R | Substitution - Missense | 3:178952085-178952085 |
| 1692036       | 1692036 | 1600301 | c.1633G>A | p.E545K  | Substitution - Missense | 3:178936091-178936091 |
| 1972300       | 1972300 | 1858549 | c.?       | p.E545K  | Substitution - Missense |                       |
| 1301966       | 1301966 | 1213017 | c.3140A>G | p.H1047R | Substitution - Missense | 3:178952085-178952085 |
| T-47D         | 904395  | 821940  | c.3140A>G | p.H1047R | Substitution - Missense | 3:178952085-178952085 |
| 1972498       | 1972498 | 1858747 | c.?       | p.H1047R | Substitution - Missense |                       |
| 1972428       | 1972428 | 1858677 | c.?       | p.H1047R | Substitution - Missense |                       |
| 1443897       | 1443897 | 1368142 | c.?       | p.H1047R | Substitution - Missense |                       |
| 1443735       | 1443735 | 1367980 | c.?       | p.H1047R | Substitution - Missense |                       |
| 1443897       | 1443897 | 1368142 | c.?       | p.E542K  | Substitution - Missense |                       |
| 1698832       | 1698832 | 1606950 | c.?       | p.E542K  | Substitution - Missense |                       |
| 1321139       | 1321139 | 1232026 | c.3140A>G | p.H1047R | Substitution - Missense | 3:178952085-178952085 |
| MCF7          | 1308991 | 1219936 | c.?       | p.E545K  | Substitution - Missense |                       |
| CGA-BH-A42V-0 | 2187790 | 2056068 | c.1633G>A | p.E545K  | Substitution - Missense | 3:178936091-178936091 |
| CGA-A8-A08O-0 | 1899705 | 1788389 | c.3140A>G | p.H1047R | Substitution - Missense | 3:178952085-178952085 |
| CGA-E9-A1RC-0 | 1900206 | 1788890 | c.3140A>G | p.H1047R | Substitution - Missense | 3:178952085-178952085 |
| CGA-A2-A0SY-0 | 1899630 | 1788314 | c.1633G>A | p.E545K  | Substitution - Missense | 3:178936091-178936091 |
| 1972389       | 1972389 | 1858638 | c.?       | p.H1047R | Substitution - Missense |                       |
| 1297120       | 1297120 | 1208174 | c.?       | p.N345K  | Substitution - Missense |                       |
| 1329588       | 1329588 | 1240073 | c.3140A>G | p.H1047R | Substitution - Missense | 3:178952085-178952085 |
| 1698527       | 1698527 | 1606645 | c.3140A>G | p.H1047R | Substitution - Missense | 3:178952085-178952085 |
| BB33T         | 1430376 | 1339790 | c.3140A>T | p.H1047L | Substitution - Missense | 3:178952085-178952085 |
| 1297152       | 1297152 | 1208206 | c.3140A>G | p.H1047R | Substitution - Missense | 3:178952085-178952085 |
| 1135896       | 1135896 | 1048460 | c.1633G>A | p.E545K  | Substitution - Missense | 3:178936091-178936091 |
| 1703729       | 1703729 | 1611838 | c.1624G>A | p.E542K  | Substitution - Missense | 3:178936082-178936082 |
| 1443621       | 1443621 | 1367866 | c.?       | p.H1047R | Substitution - Missense |                       |
| 1135837       | 1135837 | 1048401 | c.3140A>G | p.H1047R | Substitution - Missense | 3:178952085-178952085 |
| 1972539       | 1972539 | 1858788 | c.?       | p.H1047R | Substitution - Missense |                       |
| 1972246       | 1972246 | 1858495 | c.?       | p.E545K  | Substitution - Missense |                       |
| 1691695       | 1691695 | 1599961 | c.?       | p.E545K  | Substitution - Missense |                       |
| 1329893       | 1329893 | 1240378 | c.1624G>A | p.E542K  | Substitution - Missense | 3:178936082-178936082 |
| 1443614       | 1443614 | 1367859 | c.?       | p.H1047R | Substitution - Missense |                       |
| 6             | 1971255 | 1857504 | c.3132T>A | p.N1044K | Substitution - Missense | 3:178952077-178952077 |
| 1709224       | 1709224 | 1617130 | c.?       | p.H1047R | Substitution - Missense |                       |
| 1244893       | 1244893 | 1156599 | c.3140A>G | p.H1047R | Substitution - Missense | 3:178952085-178952085 |
| 1124422       | 1124422 | 1037465 | c.3140A>G | p.H1047R | Substitution - Missense | 3:178952085-178952085 |
| 1124415       | 1124415 | 1037458 | c.3140A>G | p.H1047R | Substitution - Missense | 3:178952085-178952085 |
| 103848        | 1520521 | 1442896 | c.3140A>T | p.H1047L | Substitution - Missense | 3:178952085-178952085 |
| 1698511       | 1698511 | 1606629 | c.1634A>C | p.E545A  | Substitution - Missense | 3:178936092-178936092 |
| 2067943       | 2067943 | 1947736 | c.?       | p.N345K  | Substitution - Missense |                       |
| 1312249       | 1312249 | 1223158 | c.?       | p.E545K  | Substitution - Missense |                       |
| 1675746       | 1675746 | 1588619 | c.3140A>G | p.H1047R | Substitution - Missense | 3:178952085-178952085 |
| 1017903       | 1017903 | 935061  | c.3140A>G | p.H1047R | Substitution - Missense | 3:178952085-178952085 |



|               |         |         |         |                 |             |                         |                       |
|---------------|---------|---------|---------|-----------------|-------------|-------------------------|-----------------------|
|               | 1244840 | 1244840 | 1156546 | c.1634A>C       | p.E545A     | Substitution - Missense | 3:178936092-178936092 |
|               | 1244850 | 1244850 | 1156556 | c.1637A>G       | p.Q546R     | Substitution - Missense | 3:178936095-178936095 |
|               | 1297121 | 1297121 | 1208175 | c.?             | p.E545K     | Substitution - Missense |                       |
|               | 1972288 | 1972288 | 1858537 | c.?             | p.E545K     | Substitution - Missense |                       |
|               | 1124260 | 1124260 | 1037303 | c.3140A>G       | p.H1047R    | Substitution - Missense | 3:178952085-178952085 |
|               | 1244947 | 1244947 | 1156653 | c.3140A>G       | p.H1047R    | Substitution - Missense | 3:178952085-178952085 |
|               | 1703847 | 1703847 | 1611956 | c.3140A>G       | p.H1047R    | Substitution - Missense | 3:178952085-178952085 |
|               | 1135804 | 1135804 | 1048368 | c.3140A>G       | p.H1047R    | Substitution - Missense | 3:178952085-178952085 |
|               | 1244862 | 1244862 | 1156568 | c.3140A>T       | p.H1047L    | Substitution - Missense | 3:178952085-178952085 |
|               | 1691738 | 1691738 | 1600004 | c.?             | p.H1047R    | Substitution - Missense |                       |
|               | 1329608 | 1329608 | 1240093 | c.3140A>G       | p.H1047R    | Substitution - Missense | 3:178952085-178952085 |
| CGA-AR-A24K-0 | 1899833 | 1899833 | 1788517 | c.1049A>G       | p.D350G     | Substitution - Missense | 3:178921567-178921567 |
|               | 1018403 | 1018403 | 935561  | c.1634A>C       | p.E545A     | Substitution - Missense | 3:178936092-178936092 |
|               | 1698524 | 1698524 | 1606642 | c.1634A>C       | p.E545A     | Substitution - Missense | 3:178936092-178936092 |
|               | 1124149 | 1124149 | 1037192 | c.3140A>G       | p.H1047R    | Substitution - Missense | 3:178952085-178952085 |
|               | 1017192 | 1017192 | 934362  | c.3140A>T       | p.H1047L    | Substitution - Missense | 3:178952085-178952085 |
|               | 1134442 | 1134442 | 1047102 | c.3145G>C       | p.G1049R    | Substitution - Missense | 3:178952090-178952090 |
|               | 1709215 | 1709215 | 1617121 | c.?             | p.E545K     | Substitution - Missense |                       |
|               | SA214   | 1659984 | 1574312 | c.3140A>G       | p.H1047R    | Substitution - Missense | 3:178952085-178952085 |
|               | BT474   | 1308996 | 1219941 | c.?             | p.K111N     | Substitution - Missense |                       |
|               | 1691707 | 1691707 | 1599973 | c.?             | p.H1047R    | Substitution - Missense |                       |
|               | 1425133 | 1425133 | 1335161 | c.?             | p.H1047R    | Substitution - Missense |                       |
|               | 1698860 | 1698860 | 1606978 | c.3140A>G       | p.H1047R    | Substitution - Missense | 3:178952085-178952085 |
|               | BB18T   | 1430368 | 1339782 | c.1633G>A       | p.E545K     | Substitution - Missense | 3:178936091-178936091 |
|               | 1972270 | 1972270 | 1858519 | c.?             | p.E545K     | Substitution - Missense |                       |
|               | 1312222 | 1312222 | 1223131 | c.?             | p.H1047L    | Substitution - Missense |                       |
|               | 1703751 | 1703751 | 1611860 | c.1633G>A       | p.E545K     | Substitution - Missense | 3:178936091-178936091 |
|               | 1244806 | 1244806 | 1156512 | c.1624G>A       | p.E542K     | Substitution - Missense | 3:178936082-178936082 |
|               | 1443611 | 1443611 | 1367856 | c.?             | p.H1047R    | Substitution - Missense |                       |
| MDA-MB-453    | 1046931 | 1046931 | 963162  | c.3140A>G       | p.H1047R    | Substitution - Missense | 3:178952085-178952085 |
|               | 1018914 | 1018914 | 935937  | c.1624G>A       | p.E542K     | Substitution - Missense | 3:178936082-178936082 |
|               | 1739281 | 1739281 | 1645002 | c.?             | p.H1047R    | Substitution - Missense |                       |
|               | 104066  | 1520581 | 1442956 | c.3129G>C       | p.M1043I    | Substitution - Missense | 3:178952074-178952074 |
|               | 1301944 | 1301944 | 1212995 | c.1637A>C       | p.Q546P     | Substitution - Missense | 3:178936095-178936095 |
|               | 1122685 | 1122685 | 1035729 | c.3140A>G       | p.H1047R    | Substitution - Missense | 3:178952085-178952085 |
|               | 1972384 | 1972384 | 1858633 | c.?             | p.H1047R    | Substitution - Missense |                       |
|               | 107970  | 1520605 | 1442980 | c.3140A>G       | p.H1047R    | Substitution - Missense | 3:178952085-178952085 |
| CGA-D8-A1JG-0 | 1900053 | 1900053 | 1788737 | c.1364_1365insG | p.L456fs*13 | Insertion - Frameshift  | 3:178928086-178928087 |
|               | 1244883 | 1244883 | 1156589 | c.3140A>G       | p.H1047R    | Substitution - Missense | 3:178952085-178952085 |
|               | 1134443 | 1134443 | 1047103 | c.3140A>G       | p.H1047R    | Substitution - Missense | 3:178952085-178952085 |
|               | 1670305 | 1670305 | 1583591 | c.3140A>G       | p.H1047R    | Substitution - Missense | 3:178952085-178952085 |
|               | E40055  | 894107  | 811875  | c.1633G>A       | p.E545K     | Substitution - Missense | 3:178936091-178936091 |
|               | 1972231 | 1972231 | 1858480 | c.?             | p.E545K     | Substitution - Missense |                       |

|               |         |         |           |          |                         |                       |
|---------------|---------|---------|-----------|----------|-------------------------|-----------------------|
| 1329750       | 1329750 | 1240235 | c.3140A>T | p.H1047L | Substitution - Missense | 3:178952085-178952085 |
| 1972475       | 1972475 | 1858724 | c.?       | p.H1047R | Substitution - Missense |                       |
| E40061        | 894113  | 811881  | c.1633G>A | p.E545K  | Substitution - Missense | 3:178936091-178936091 |
| 1864119       | 1864119 | 1754972 | c.?       | p.Q546R  | Substitution - Missense |                       |
| 1017848       | 1017848 | 935006  | c.1625A>T | p.E542V  | Substitution - Missense | 3:178936083-178936083 |
| 1443905       | 1443905 | 1368150 | c.?       | p.H1047R | Substitution - Missense |                       |
| 1972374       | 1972374 | 1858623 | c.?       | p.H1047R | Substitution - Missense |                       |
| 904455        | 904455  | 822000  | c.3140A>G | p.H1047R | Substitution - Missense | 3:178952085-178952085 |
| 1692035       | 1692035 | 1600300 | c.1633G>A | p.E545K  | Substitution - Missense | 3:178936091-178936091 |
| 1124391       | 1124391 | 1037434 | c.1624G>A | p.E542K  | Substitution - Missense | 3:178936082-178936082 |
| CGA-A8-A06R-0 | 1899671 | 1788355 | c.1633G>A | p.E545K  | Substitution - Missense | 3:178936091-178936091 |
| 1018912       | 1018912 | 935935  | c.1624G>A | p.E542K  | Substitution - Missense | 3:178936082-178936082 |
| CGA-AN-A03Y-0 | 1899743 | 1788427 | c.3140A>G | p.H1047R | Substitution - Missense | 3:178952085-178952085 |
| CGA-A2-A0YH-0 | 1899635 | 1788319 | c.1035T>A | p.N345K  | Substitution - Missense | 3:178921553-178921553 |
| CGA-A8-A06P-0 | 1899670 | 1788354 | c.1633G>A | p.E545K  | Substitution - Missense | 3:178936091-178936091 |
| 1709221       | 1709221 | 1617127 | c.?       | p.H1047R | Substitution - Missense |                       |
| 1698891       | 1698891 | 1607009 | c.?       | p.H1047L | Substitution - Missense |                       |
| 1972557       | 1972557 | 1858806 | c.?       | p.H1047R | Substitution - Missense |                       |
| 1972406       | 1972406 | 1858655 | c.?       | p.H1047R | Substitution - Missense |                       |
| 1691741       | 1691741 | 1600007 | c.?       | p.H1047R | Substitution - Missense |                       |
| 1244784       | 1244784 | 1156490 | c.1624G>A | p.E542K  | Substitution - Missense | 3:178936082-178936082 |
| 1720332       | 1720332 | 1627612 | c.?       | p.H1047R | Substitution - Missense |                       |
| 1972534       | 1972534 | 1858783 | c.?       | p.H1047R | Substitution - Missense |                       |
| 1703781       | 1703781 | 1611890 | c.1637A>G | p.Q546R  | Substitution - Missense | 3:178936095-178936095 |
| 1703736       | 1703736 | 1611845 | c.1624G>A | p.E542K  | Substitution - Missense | 3:178936082-178936082 |
| E40051        | 894103  | 811871  | c.1624G>A | p.E542K  | Substitution - Missense | 3:178936082-178936082 |
| 1135856       | 1135856 | 1048420 | c.3140A>G | p.H1047R | Substitution - Missense | 3:178952085-178952085 |
| BC133         | 1281099 | 1192390 | c.?       | p.H1047R | Substitution - Missense |                       |
| 1698517       | 1698517 | 1606635 | c.1634A>C | p.E545A  | Substitution - Missense | 3:178936092-178936092 |
| 1135863       | 1135863 | 1048427 | c.3140A>T | p.H1047L | Substitution - Missense | 3:178952085-178952085 |
| 1972462       | 1972462 | 1858711 | c.?       | p.H1047R | Substitution - Missense |                       |
| 1124611       | 1124611 | 1037654 | c.1633G>A | p.E545K  | Substitution - Missense | 3:178936091-178936091 |
| Sample_II     | 2053323 | 1933575 | c.3140A>G | p.H1047R | Substitution - Missense | 3:178952085-178952085 |
| 1321133       | 1321133 | 1232020 | c.3140A>G | p.H1047R | Substitution - Missense | 3:178952085-178952085 |
| 1709233       | 1709233 | 1617139 | c.3140A>G | p.H1047R | Substitution - Missense | 3:178952085-178952085 |
| 1738891       | 1738891 | 1644722 | c.328G>A  | p.E110K  | Substitution - Missense | 3:178916941-178916941 |
| 1135879       | 1135879 | 1048443 | c.1633G>A | p.E545K  | Substitution - Missense | 3:178936091-178936091 |
| 1124613       | 1124613 | 1037656 | c.1634A>G | p.E545G  | Substitution - Missense | 3:178936092-178936092 |
| 1212750       | 1212750 | 1124617 | c.3140A>G | p.H1047R | Substitution - Missense | 3:178952085-178952085 |
| 1882689       | 1882689 | 1772809 | c.3140A>G | p.H1047R | Substitution - Missense | 3:178952085-178952085 |
| 1703743       | 1703743 | 1611852 | c.1634A>G | p.E545G  | Substitution - Missense | 3:178936092-178936092 |
| 1193509       | 1193509 | 1105405 | c.?       | p.H1047R | Substitution - Missense |                       |
| 1329731       | 1329731 | 1240216 | c.3140A>G | p.H1047R | Substitution - Missense | 3:178952085-178952085 |

|                |         |         |           |          |                         |                       |
|----------------|---------|---------|-----------|----------|-------------------------|-----------------------|
| 1670301        | 1670301 | 1583587 | c.1633G>A | p.E545K  | Substitution - Missense | 3:178936091-178936091 |
| 1193505        | 1193505 | 1105401 | c.?       | p.H1047R | Substitution - Missense |                       |
| 1329901        | 1329901 | 1240386 | c.3140A>G | p.H1047R | Substitution - Missense | 3:178952085-178952085 |
| 1425163        | 1425163 | 1335191 | c.?       | p.H1047R | Substitution - Missense |                       |
| 1419239        | 1419239 | 1329280 | c.3140A>G | p.H1047R | Substitution - Missense | 3:178952085-178952085 |
| TCGA-A2-A1FZ-0 | 1899640 | 1788324 | c.3140A>G | p.H1047R | Substitution - Missense | 3:178952085-178952085 |
| MDA-MB-361     | 904379  | 821924  | c.1633G>A | p.E545K  | Substitution - Missense | 3:178936091-178936091 |
| 1124243        | 1124243 | 1037286 | c.1633G>A | p.E545K  | Substitution - Missense | 3:178936091-178936091 |
| 1193516        | 1193516 | 1105412 | c.?       | p.H1047R | Substitution - Missense |                       |
| 1301934        | 1301934 | 1212985 | c.1633G>A | p.E545K  | Substitution - Missense | 3:178936091-178936091 |
| 1135855        | 1135855 | 1048419 | c.3140A>G | p.H1047R | Substitution - Missense | 3:178952085-178952085 |
| TCGA-A2-A4S2-0 | 2187875 | 2056153 | c.1633G>A | p.E545K  | Substitution - Missense | 3:178936091-178936091 |
| 1212749        | 1212749 | 1124616 | c.1634A>G | p.E545G  | Substitution - Missense | 3:178936092-178936092 |
| TCGA-AC-A2B8-0 | 2187847 | 2056125 | c.1633G>A | p.E545K  | Substitution - Missense | 3:178936091-178936091 |
| SUM185PE       | 1136381 | 1048945 | c.3140A>G | p.H1047R | Substitution - Missense | 3:178952085-178952085 |
| TCGA-E9-A1NG-0 | 1900193 | 1788877 | c.1633G>A | p.E545K  | Substitution - Missense | 3:178936091-178936091 |
| 101            | 1860503 | 1751444 | c.1633G>A | p.E545K  | Substitution - Missense | 3:178936091-178936091 |
| 1720345        | 1720345 | 1627625 | c.?       | p.E545K  | Substitution - Missense |                       |
| 1135835        | 1135835 | 1048399 | c.3140A>G | p.H1047R | Substitution - Missense | 3:178952085-178952085 |
| 904406         | 904406  | 821951  | c.1258T>C | p.C420R  | Substitution - Missense | 3:178927980-178927980 |
| 1297127        | 1297127 | 1208181 | c.?       | p.H1047R | Substitution - Missense |                       |
| 2131992        | 2131992 | 2006055 | c.?       | p.H1047R | Substitution - Missense |                       |
| 1972437        | 1972437 | 1858686 | c.?       | p.H1047R | Substitution - Missense |                       |
| 1691743        | 1691743 | 1600009 | c.?       | p.H1047R | Substitution - Missense |                       |
| 1530129        | 1530129 | 1452501 | c.3140A>G | p.H1047R | Substitution - Missense | 3:178952085-178952085 |
| 1703868        | 1703868 | 1611977 | c.3197C>T | p.A1066V | Substitution - Missense | 3:178952142-178952142 |
| 1703868        | 1703868 | 1611977 | c.3140A>T | p.H1047L | Substitution - Missense | 3:178952085-178952085 |
| 1329563        | 1329563 | 1240048 | c.1624G>A | p.E542K  | Substitution - Missense | 3:178936082-178936082 |
| 1301942        | 1301942 | 1212993 | c.1633G>A | p.E545K  | Substitution - Missense | 3:178936091-178936091 |
| 2131990        | 2131990 | 2006053 | c.?       | p.E545K  | Substitution - Missense |                       |
| 1017839        | 1017839 | 934997  | c.1624G>A | p.E542K  | Substitution - Missense | 3:178936082-178936082 |
| 1443714        | 1443714 | 1367959 | c.?       | p.H1047R | Substitution - Missense |                       |
| 1972434        | 1972434 | 1858683 | c.?       | p.H1047R | Substitution - Missense |                       |
| 1972453        | 1972453 | 1858702 | c.?       | p.H1047R | Substitution - Missense |                       |
| 1443711        | 1443711 | 1367956 | c.?       | p.H1047R | Substitution - Missense |                       |
| 1972526        | 1972526 | 1858775 | c.?       | p.H1047R | Substitution - Missense |                       |
| 904432         | 904432  | 821977  | c.1633G>A | p.E545K  | Substitution - Missense | 3:178936091-178936091 |
| 1864112        | 1864112 | 1754965 | c.?       | p.E545K  | Substitution - Missense |                       |
| 1703791        | 1703791 | 1611900 | c.3140A>T | p.H1047L | Substitution - Missense | 3:178952085-178952085 |
| 1124097        | 1124097 | 1037140 | c.3140A>T | p.H1047L | Substitution - Missense | 3:178952085-178952085 |
| 1018923        | 1018923 | 935946  | c.3140A>G | p.H1047R | Substitution - Missense | 3:178952085-178952085 |
| 1124597        | 1124597 | 1037640 | c.3140A>G | p.H1047R | Substitution - Missense | 3:178952085-178952085 |
| 1703771        | 1703771 | 1611880 | c.1633G>A | p.E545K  | Substitution - Missense | 3:178936091-178936091 |

|               |         |         |                 |             |                         |                       |
|---------------|---------|---------|-----------------|-------------|-------------------------|-----------------------|
| 1972491       | 1972491 | 1858740 | c.?             | p.H1047R    | Substitution - Missense |                       |
| E40067        | 894119  | 811887  | c.3140A>G       | p.H1047R    | Substitution - Missense | 3:178952085-178952085 |
| 1972394       | 1972394 | 1858643 | c.?             | p.H1047R    | Substitution - Missense |                       |
| 1312216       | 1312216 | 1223125 | c.?             | p.H1047R    | Substitution - Missense |                       |
| 1329738       | 1329738 | 1240223 | c.3140A>G       | p.H1047R    | Substitution - Missense | 3:178952085-178952085 |
| 1329836       | 1329836 | 1240321 | c.3140A>T       | p.H1047L    | Substitution - Missense | 3:178952085-178952085 |
| 1301921       | 1301921 | 1212972 | c.1624G>C       | p.E542Q     | Substitution - Missense | 3:178936082-178936082 |
| 1301921       | 1301921 | 1212972 | c.3140A>G       | p.H1047R    | Substitution - Missense | 3:178952085-178952085 |
| 1882712       | 1882712 | 1772832 | c.3140A>G       | p.H1047R    | Substitution - Missense | 3:178952085-178952085 |
| 1301953       | 1301953 | 1213004 | c.3140A>G       | p.H1047R    | Substitution - Missense | 3:178952085-178952085 |
| 1703810       | 1703810 | 1611919 | c.3140A>G       | p.H1047R    | Substitution - Missense | 3:178952085-178952085 |
| 1321153       | 1321153 | 1232040 | c.3140A>G       | p.H1047R    | Substitution - Missense | 3:178952085-178952085 |
| 1017895       | 1017895 | 935053  | c.3140A>G       | p.H1047R    | Substitution - Missense | 3:178952085-178952085 |
| HF-11221      | 1507801 | 1430667 | c.3140A>G       | p.H1047R    | Substitution - Missense | 3:178952085-178952085 |
| 1703848       | 1703848 | 1611957 | c.3140A>G       | p.H1047R    | Substitution - Missense | 3:178952085-178952085 |
| 1244808       | 1244808 | 1156514 | c.1633G>A       | p.E545K     | Substitution - Missense | 3:178936091-178936091 |
| 1329573       | 1329573 | 1240058 | c.1633G>A       | p.E545K     | Substitution - Missense | 3:178936091-178936091 |
| 1972454       | 1972454 | 1858703 | c.?             | p.H1047R    | Substitution - Missense |                       |
| 1698878       | 1698878 | 1606996 | c.3140A>G       | p.H1047R    | Substitution - Missense | 3:178952085-178952085 |
| 1329824       | 1329824 | 1240309 | c.3140A>G       | p.H1047R    | Substitution - Missense | 3:178952085-178952085 |
| 1124232       | 1124232 | 1037275 | c.1035T>A       | p.N345K     | Substitution - Missense | 3:178921553-178921553 |
| 2107708       | 2107708 | 1985569 | c.3140A>G       | p.H1047R    | Substitution - Missense | 3:178952085-178952085 |
| 1972272       | 1972272 | 1858521 | c.?             | p.E545K     | Substitution - Missense |                       |
| CGA-D8-A1JK-0 | 1900057 | 1788741 | c.1633G>A       | p.E545K     | Substitution - Missense | 3:178936091-178936091 |
| 1329834       | 1329834 | 1240319 | c.3140A>T       | p.H1047L    | Substitution - Missense | 3:178952085-178952085 |
| CGA-C8-A3M7-0 | 2187788 | 2056066 | c.3140A>G       | p.H1047R    | Substitution - Missense | 3:178952085-178952085 |
| CGA-A2-A0T4-0 | 1779309 | 1683308 | c.3140A>G       | p.H1047R    | Substitution - Missense | 3:178952085-178952085 |
| CGA-E9-A1RE-0 | 1900208 | 1788892 | c.311C>T        | p.P104L     | Substitution - Missense | 3:178916924-178916924 |
| 1698857       | 1698857 | 1606975 | c.3140A>G       | p.H1047R    | Substitution - Missense | 3:178952085-178952085 |
| 1329583       | 1329583 | 1240068 | c.3140A>G       | p.H1047R    | Substitution - Missense | 3:178952085-178952085 |
| 1675749       | 1675749 | 1588621 | c.3140A>G       | p.H1047R    | Substitution - Missense | 3:178952085-178952085 |
| 1698869       | 1698869 | 1606987 | c.3140A>G       | p.H1047R    | Substitution - Missense | 3:178952085-178952085 |
| 1329565       | 1329565 | 1240050 | c.1624G>A       | p.E542K     | Substitution - Missense | 3:178936082-178936082 |
| 1703745       | 1703745 | 1611854 | c.1633G>A       | p.E545K     | Substitution - Missense | 3:178936091-178936091 |
| 1670307       | 1670307 | 1583593 | c.3140A>G       | p.H1047R    | Substitution - Missense | 3:178952085-178952085 |
| 1972514       | 1972514 | 1858763 | c.?             | p.H1047R    | Substitution - Missense |                       |
| 1972317       | 1972317 | 1858566 | c.?             | p.H1047L    | Substitution - Missense |                       |
| 1329755       | 1329755 | 1240240 | c.3204_3205insA | p.N1068fs*4 | Insertion - Frameshift  | 3:178952149-178952150 |
| 1135798       | 1135798 | 1048362 | c.3140A>G       | p.H1047R    | Substitution - Missense | 3:178952085-178952085 |
| 2067910       | 2067910 | 1947703 | c.?             | p.H1047L    | Substitution - Missense |                       |
| 1135820       | 1135820 | 1048384 | c.3140A>G       | p.H1047R    | Substitution - Missense | 3:178952085-178952085 |
| 1691705       | 1691705 | 1599971 | c.?             | p.H1047R    | Substitution - Missense |                       |
| 1676265       | 1676265 | 1589037 | c.?             | p.E542K     | Substitution - Missense |                       |

|                |         |         |           |          |                         |                       |
|----------------|---------|---------|-----------|----------|-------------------------|-----------------------|
| 1738926        | 1738926 | 1644757 | c.3073A>K | p.T1025? | Substitution - Missense | 3:178952018-178952018 |
| 1329832        | 1329832 | 1240317 | c.3140A>G | p.H1047R | Substitution - Missense | 3:178952085-178952085 |
| 1972202        | 1972202 | 1858451 | c.?       | p.E545G  | Substitution - Missense |                       |
| 1312218        | 1312218 | 1223127 | c.?       | p.H1047R | Substitution - Missense |                       |
| 1124607        | 1124607 | 1037650 | c.3140A>G | p.H1047R | Substitution - Missense | 3:178952085-178952085 |
| 1321128        | 1321128 | 1232015 | c.1636C>A | p.Q546K  | Substitution - Missense | 3:178936094-178936094 |
| 1193531        | 1193531 | 1105427 | c.?       | p.H1047R | Substitution - Missense |                       |
| E39834         | 894045  | 811813  | c.3140A>G | p.H1047R | Substitution - Missense | 3:178952085-178952085 |
| 1124249        | 1124249 | 1037292 | c.3140A>T | p.H1047L | Substitution - Missense | 3:178952085-178952085 |
| 1244945        | 1244945 | 1156651 | c.3140A>G | p.H1047R | Substitution - Missense | 3:178952085-178952085 |
| 2067949        | 2067949 | 1947742 | c.?       | p.H1047R | Substitution - Missense |                       |
| 1691740        | 1691740 | 1600006 | c.?       | p.H1047R | Substitution - Missense |                       |
| 1193515        | 1193515 | 1105411 | c.?       | p.H1047R | Substitution - Missense |                       |
| TCGA-D8-A1JJ-0 | 1900056 | 1788740 | c.3140A>G | p.H1047R | Substitution - Missense | 3:178952085-178952085 |
| 1670204        | 1670204 | 1583490 | c.3140A>G | p.H1047R | Substitution - Missense | 3:178952085-178952085 |
| 1972278        | 1972278 | 1858527 | c.?       | p.E545K  | Substitution - Missense |                       |
| 1193540        | 1193540 | 1105436 | c.?       | p.H1047R | Substitution - Missense |                       |
| 1321113        | 1321113 | 1232000 | c.1624G>A | p.E542K  | Substitution - Missense | 3:178936082-178936082 |
| 1124388        | 1124388 | 1037431 | c.1624G>A | p.E542K  | Substitution - Missense | 3:178936082-178936082 |
| 1972346        | 1972346 | 1858595 | c.?       | p.H1047L | Substitution - Missense |                       |
| 1135861        | 1135861 | 1048425 | c.3140A>G | p.H1047R | Substitution - Missense | 3:178952085-178952085 |
| 1972237        | 1972237 | 1858486 | c.?       | p.E545K  | Substitution - Missense |                       |
| 1134435        | 1134435 | 1047095 | c.?       | p.H1047T | Substitution - Missense |                       |
| 1972554        | 1972554 | 1858803 | c.?       | p.H1047R | Substitution - Missense |                       |
| TCGA-C8-A3M8-0 | 2187787 | 2056065 | c.3129G>C | p.M1043I | Substitution - Missense | 3:178952074-178952074 |
| 1419249        | 1419249 | 1329290 | c.3140A>G | p.H1047R | Substitution - Missense | 3:178952085-178952085 |
| 3              | 1860498 | 1751439 | c.1624G>A | p.E542K  | Substitution - Missense | 3:178936082-178936082 |
| BT20           | 1017159 | 934329  | c.1616C>G | p.P539R  | Substitution - Missense | 3:178936074-178936074 |
| 1972179        | 1972179 | 1858428 | c.?       | p.E542K  | Substitution - Missense |                       |
| 1972137        | 1972137 | 1858386 | c.?       | p.E542K  | Substitution - Missense |                       |
| BT20           | 1017159 | 934329  | c.3140A>G | p.H1047R | Substitution - Missense | 3:178952085-178952085 |
| 1301947        | 1301947 | 1212998 | c.?       | p.?      | Substitution - Missense |                       |
| 1703822        | 1703822 | 1611931 | c.3140A>G | p.H1047R | Substitution - Missense | 3:178952085-178952085 |
| 1738908        | 1738908 | 1644739 | c.3140A>G | p.H1047R | Substitution - Missense | 3:178952085-178952085 |
| 1670209        | 1670209 | 1583495 | c.3140A>G | p.H1047R | Substitution - Missense | 3:178952085-178952085 |
| 1135889        | 1135889 | 1048453 | c.1633G>A | p.E545K  | Substitution - Missense | 3:178936091-178936091 |
| CGA-AN-A0XO-C  | 1899765 | 1788449 | c.1357G>A | p.E453K  | Substitution - Missense | 3:178928079-178928079 |
| 1972218        | 1972218 | 1858467 | c.?       | p.E545K  | Substitution - Missense |                       |
| CGA-AN-A0XO-C  | 1899765 | 1788449 | c.1624G>A | p.E542K  | Substitution - Missense | 3:178936082-178936082 |
| 1676220        | 1676220 | 1588992 | c.?       | p.H1047R | Substitution - Missense |                       |
| 904424         | 904424  | 821969  | c.1633G>A | p.E545K  | Substitution - Missense | 3:178936091-178936091 |
| 1972247        | 1972247 | 1858496 | c.?       | p.E545K  | Substitution - Missense |                       |
| 1135910        | 1135910 | 1048474 | c.?       | p.K111N  | Substitution - Missense |                       |

|               |         |         |         |                 |             |                         |                       |
|---------------|---------|---------|---------|-----------------|-------------|-------------------------|-----------------------|
|               | 1443900 | 1443900 | 1368145 | c.?             | p.H1047R    | Substitution - Missense |                       |
|               | 1244814 | 1244814 | 1156520 | c.1633G>A       | p.E545K     | Substitution - Missense | 3:178936091-178936091 |
|               | 1972479 | 1972479 | 1858728 | c.?             | p.H1047R    | Substitution - Missense |                       |
|               | 1135813 | 1135813 | 1048377 | c.3140A>G       | p.H1047R    | Substitution - Missense | 3:178952085-178952085 |
| CGA-C8-A12L-0 | 1899997 | 1899997 | 1788681 | c.3140A>G       | p.H1047R    | Substitution - Missense | 3:178952085-178952085 |
|               | 1703767 | 1703767 | 1611876 | c.1633G>A       | p.E545K     | Substitution - Missense | 3:178936091-178936091 |
|               | 1244864 | 1244864 | 1156570 | c.3140A>T       | p.H1047L    | Substitution - Missense | 3:178952085-178952085 |
|               | 1135898 | 1135898 | 1048462 | c.1624G>A       | p.E542K     | Substitution - Missense | 3:178936082-178936082 |
| CGA-EW-A10V-C | 1900240 | 1900240 | 1788924 | c.241G>A        | p.E81K      | Substitution - Missense | 3:178916854-178916854 |
|               | 904450  | 904450  | 821995  | c.3140A>G       | p.H1047R    | Substitution - Missense | 3:178952085-178952085 |
|               | 1670190 | 1670190 | 1583476 | c.1633G>A       | p.E545K     | Substitution - Missense | 3:178936091-178936091 |
|               | 1212755 | 1212755 | 1124622 | c.3140A>G       | p.H1047R    | Substitution - Missense | 3:178952085-178952085 |
|               | 1670328 | 1670328 | 1583614 | c.3140A>T       | p.H1047L    | Substitution - Missense | 3:178952085-178952085 |
|               | 1972361 | 1972361 | 1858610 | c.?             | p.H1047R    | Substitution - Missense |                       |
| CGA-E2-A11O-0 | 1900169 | 1900169 | 1788853 | c.1624G>A       | p.E542K     | Substitution - Missense | 3:178936082-178936082 |
|               | 1972509 | 1972509 | 1858758 | c.?             | p.H1047R    | Substitution - Missense |                       |
|               | 1329723 | 1329723 | 1240208 | c.1633G>A       | p.E545K     | Substitution - Missense | 3:178936091-178936091 |
|               | 1703784 | 1703784 | 1611893 | c.3203_3204insA | p.N1068fs*5 | Insertion - Frameshift  | 3:178952148-178952149 |
|               | 1312214 | 1312214 | 1223123 | c.?             | p.H1047R    | Substitution - Missense |                       |
|               | 1972508 | 1972508 | 1858757 | c.?             | p.H1047R    | Substitution - Missense |                       |
|               | 1301955 | 1301955 | 1213006 | c.3140A>G       | p.H1047R    | Substitution - Missense | 3:178952085-178952085 |
|               | 1244826 | 1244826 | 1156532 | c.1633G>A       | p.E545K     | Substitution - Missense | 3:178936091-178936091 |
|               | 1329742 | 1329742 | 1240227 | c.3140A>G       | p.H1047R    | Substitution - Missense | 3:178952085-178952085 |
|               | 1670289 | 1670289 | 1583575 | c.3140A>G       | p.H1047R    | Substitution - Missense | 3:178952085-178952085 |
|               | 1703801 | 1703801 | 1611910 | c.3140A>G       | p.H1047R    | Substitution - Missense | 3:178952085-178952085 |
|               | 1244925 | 1244925 | 1156631 | c.3140A>G       | p.H1047R    | Substitution - Missense | 3:178952085-178952085 |
|               | 1703861 | 1703861 | 1611970 | c.3140A>G       | p.H1047R    | Substitution - Missense | 3:178952085-178952085 |
|               | 1193561 | 1193561 | 1105457 | c.?             | p.E545K     | Substitution - Missense |                       |
|               | 1443705 | 1443705 | 1367950 | c.?             | p.H1047R    | Substitution - Missense |                       |
|               | 1972358 | 1972358 | 1858607 | c.?             | p.H1047R    | Substitution - Missense |                       |
|               | 1703853 | 1703853 | 1611962 | c.3140A>G       | p.H1047R    | Substitution - Missense | 3:178952085-178952085 |
|               | 1301920 | 1301920 | 1212971 | c.1616C>G       | p.P539R     | Substitution - Missense | 3:178936074-178936074 |
|               | 1301920 | 1301920 | 1212971 | c.3140A>G       | p.H1047R    | Substitution - Missense | 3:178952085-178952085 |
|               | 1244935 | 1244935 | 1156641 | c.3140A>G       | p.H1047R    | Substitution - Missense | 3:178952085-178952085 |
|               | 1301932 | 1301932 | 1212983 | c.1633G>A       | p.E545K     | Substitution - Missense | 3:178936091-178936091 |
| SUM159PT      | 1046944 | 1046944 | 963175  | c.3140A>T       | p.H1047L    | Substitution - Missense | 3:178952085-178952085 |
| CGA-AN-A03X-0 | 1899742 | 1899742 | 1788426 | c.3140A>T       | p.H1047L    | Substitution - Missense | 3:178952085-178952085 |
| CGA-AN-A049-0 | 1899744 | 1899744 | 1788428 | c.3140A>G       | p.H1047R    | Substitution - Missense | 3:178952085-178952085 |
| CGA-AR-A1AW-C | 1899829 | 1899829 | 1788513 | c.3140A>G       | p.H1047R    | Substitution - Missense | 3:178952085-178952085 |
| CGA-AR-A1AL-0 | 1899819 | 1899819 | 1788503 | c.1633G>A       | p.E545K     | Substitution - Missense | 3:178936091-178936091 |
| CGA-BH-A18J-0 | 1899951 | 1899951 | 1788635 | c.1633G>A       | p.E545K     | Substitution - Missense | 3:178936091-178936091 |
|               | 1443703 | 1443703 | 1367948 | c.?             | p.H1047L    | Substitution - Missense |                       |
|               | 1018383 | 1018383 | 935541  | c.3140A>G       | p.H1047R    | Substitution - Missense | 3:178952085-178952085 |

|                |         |         |                      |               |                            |                       |
|----------------|---------|---------|----------------------|---------------|----------------------------|-----------------------|
| 1972211        | 1972211 | 1858460 | c.?                  | p.E545K       | Substitution - Missense    |                       |
| MDA-MB-361     | 1046933 | 963164  | c.1633G>A            | p.E545K       | Substitution - Missense    | 3:178936091-178936091 |
| MDA-MB-361     | 1046933 | 963164  | c.1700A>G            | p.K567R       | Substitution - Missense    | 3:178937019-178937019 |
| 1124605        | 1124605 | 1037648 | c.3140A>G            | p.H1047R      | Substitution - Missense    | 3:178952085-178952085 |
| 1676239        | 1676239 | 1589011 | c.3140A>G            | p.H1047R      | Substitution - Missense    | 3:178952085-178952085 |
| 1692228        | 1692228 | 1600493 | c.?                  | p.H1047R      | Substitution - Missense    |                       |
| 1244817        | 1244817 | 1156523 | c.1633G>A            | p.E545K       | Substitution - Missense    | 3:178936091-178936091 |
| 1124392        | 1124392 | 1037435 | c.1624G>A            | p.E542K       | Substitution - Missense    | 3:178936082-178936082 |
| 1703748        | 1703748 | 1611857 | c.1633G>A            | p.E545K       | Substitution - Missense    | 3:178936091-178936091 |
| 1329584        | 1329584 | 1240069 | c.3140A>G            | p.H1047R      | Substitution - Missense    | 3:178952085-178952085 |
| 1244949        | 1244949 | 1156655 | c.3140A>G            | p.H1047R      | Substitution - Missense    | 3:178952085-178952085 |
| 14             | 1971263 | 1857512 | c.1259_1265GTCCATT>A | p.C420_L422>* | Complex - deletion inframe | 3:178927981-178927987 |
| 2053358        | 2053358 | 1933604 | c.1633G>A            | p.E545K       | Substitution - Missense    | 3:178936091-178936091 |
| 2053358        | 2053358 | 1933604 | c.3140A>G            | p.H1047R      | Substitution - Missense    | 3:178952085-178952085 |
| 1670214        | 1670214 | 1583500 | c.3140A>G            | p.H1047R      | Substitution - Missense    | 3:178952085-178952085 |
| 1698876        | 1698876 | 1606994 | c.3140A>G            | p.H1047R      | Substitution - Missense    | 3:178952085-178952085 |
| 1443961        | 1443961 | 1368206 | c.?                  | p.H1047R      | Substitution - Missense    |                       |
| 2042637        | 2042637 | 1923755 | c.1633G>A            | p.E545K       | Substitution - Missense    | 3:178936091-178936091 |
| 1703849        | 1703849 | 1611958 | c.3140A>G            | p.H1047R      | Substitution - Missense    | 3:178952085-178952085 |
| 1698872        | 1698872 | 1606990 | c.3140A>G            | p.H1047R      | Substitution - Missense    | 3:178952085-178952085 |
| 1698840        | 1698840 | 1606958 | c.?                  | p.E542K       | Substitution - Missense    |                       |
| 1193499        | 1193499 | 1105395 | c.?                  | p.H1047R      | Substitution - Missense    |                       |
| 1329577        | 1329577 | 1240062 | c.1633G>A            | p.E545K       | Substitution - Missense    | 3:178936091-178936091 |
| 1698842        | 1698842 | 1606960 | c.?                  | p.E542K       | Substitution - Missense    |                       |
| 1972523        | 1972523 | 1858772 | c.?                  | p.H1047R      | Substitution - Missense    |                       |
| 1135897        | 1135897 | 1048461 | c.1633G>A            | p.E545K       | Substitution - Missense    | 3:178936091-178936091 |
| 1018394        | 1018394 | 935552  | c.3140A>G            | p.H1047R      | Substitution - Missense    | 3:178952085-178952085 |
| 1443642        | 1443642 | 1367887 | c.?                  | p.H1047R      | Substitution - Missense    |                       |
| 1244779        | 1244779 | 1156485 | c.1258T>C            | p.C420R       | Substitution - Missense    | 3:178927980-178927980 |
| 1244801        | 1244801 | 1156507 | c.1624G>A            | p.E542K       | Substitution - Missense    | 3:178936082-178936082 |
| 1972420        | 1972420 | 1858669 | c.?                  | p.H1047R      | Substitution - Missense    |                       |
| 1657044        | 1657044 | 1571699 | c.3140A>G            | p.H1047R      | Substitution - Missense    | 3:178952085-178952085 |
| 1738906        | 1738906 | 1644737 | c.3140A>G            | p.H1047R      | Substitution - Missense    | 3:178952085-178952085 |
| 1698847        | 1698847 | 1606965 | c.?                  | p.E545K       | Substitution - Missense    |                       |
| 1720333        | 1720333 | 1627613 | c.?                  | p.H1047R      | Substitution - Missense    |                       |
| 1703782        | 1703782 | 1611891 | c.1637A>G            | p.Q546R       | Substitution - Missense    | 3:178936095-178936095 |
| 1244787        | 1244787 | 1156493 | c.1624G>A            | p.E542K       | Substitution - Missense    | 3:178936082-178936082 |
| TCGA-E9-A249-0 | 1900228 | 1788912 | c.1633G>A            | p.E545K       | Substitution - Missense    | 3:178936091-178936091 |
| 2131985        | 2131985 | 2006048 | c.?                  | p.E545K       | Substitution - Missense    |                       |
| 1124234        | 1124234 | 1037277 | c.1624G>A            | p.E542K       | Substitution - Missense    | 3:178936082-178936082 |
| 1972308        | 1972308 | 1858557 | c.?                  | p.E545Q       | Substitution - Missense    |                       |
| 1972451        | 1972451 | 1858700 | c.?                  | p.H1047R      | Substitution - Missense    |                       |
| 1703750        | 1703750 | 1611859 | c.1633G>A            | p.E545K       | Substitution - Missense    | 3:178936091-178936091 |

|               |         |         |                       |               |                            |                       |
|---------------|---------|---------|-----------------------|---------------|----------------------------|-----------------------|
| 1972263       | 1972263 | 1858512 | c.?                   | p.E545K       | Substitution - Missense    |                       |
| 1443700       | 1443700 | 1367945 | c.?                   | p.H1047L      | Substitution - Missense    |                       |
| 1738912       | 1738912 | 1644743 | c.3140A>G             | p.H1047R      | Substitution - Missense    | 3:178952085-178952085 |
| 1017174       | 1017174 | 934344  | c.1616C>G             | p.P539R       | Substitution - Missense    | 3:178936074-178936074 |
| 1329747       | 1329747 | 1240232 | c.3140A>G             | p.H1047R      | Substitution - Missense    | 3:178952085-178952085 |
| 1244809       | 1244809 | 1156515 | c.1633G>A             | p.E545K       | Substitution - Missense    | 3:178936091-178936091 |
| 1972369       | 1972369 | 1858618 | c.?                   | p.H1047R      | Substitution - Missense    |                       |
| PD4085a       | 1304513 | 1215561 | c.3140A>G             | p.H1047R      | Substitution - Missense    | 3:178952085-178952085 |
| 1301967       | 1301967 | 1213018 | c.3140A>G             | p.H1047R      | Substitution - Missense    | 3:178952085-178952085 |
| 1692047       | 1692047 | 1600312 | c.1633G>A             | p.E545K       | Substitution - Missense    | 3:178936091-178936091 |
| 1703869       | 1703869 | 1611978 | c.3127A>G             | p.M1043V      | Substitution - Missense    | 3:178952072-178952072 |
| 1703869       | 1703869 | 1611978 | c.1624G>A             | p.E542K       | Substitution - Missense    | 3:178936082-178936082 |
| BC40          | 1281006 | 1192297 | c.?                   | p.H1047R      | Substitution - Missense    |                       |
| 1698886       | 1698886 | 1607004 | c.3140A>G             | p.H1047R      | Substitution - Missense    | 3:178952085-178952085 |
| 1703807       | 1703807 | 1611916 | c.3140A>G             | p.H1047R      | Substitution - Missense    | 3:178952085-178952085 |
| 1665030       | 1665030 | 1578480 | c.3140A>G             | p.H1047R      | Substitution - Missense    | 3:178952085-178952085 |
| 1972405       | 1972405 | 1858654 | c.?                   | p.H1047R      | Substitution - Missense    |                       |
| 18            | 1971267 | 1857516 | c.3140A>G             | p.H1047R      | Substitution - Missense    | 3:178952085-178952085 |
| CGA-BH-A1EY-0 | 1899971 | 1788655 | c.3140A>G             | p.H1047R      | Substitution - Missense    | 3:178952085-178952085 |
| CGA-A2-A0CR-0 | 2187896 | 2056174 | c.1624G>A             | p.E542K       | Substitution - Missense    | 3:178936082-178936082 |
| CGA-EW-A1PC-C | 2187751 | 2056029 | c.3140A>G             | p.H1047R      | Substitution - Missense    | 3:178952085-178952085 |
| 1665029       | 1665029 | 1578479 | c.3140A>G             | p.H1047R      | Substitution - Missense    | 3:178952085-178952085 |
| 1698850       | 1698850 | 1606968 | c.?                   | p.E545K       | Substitution - Missense    |                       |
| CGA-E9-A1RD-0 | 1900207 | 1788891 | c.1624G>A             | p.E542K       | Substitution - Missense    | 3:178936082-178936082 |
| E40048        | 894100  | 811868  | c.1352_1366del15      | p.G451_L456>V | Complex - deletion inframe | 3:178928074-178928088 |
| 2107711       | 2107711 | 1985572 | c.3140A>G             | p.H1047R      | Substitution - Missense    | 3:178952085-178952085 |
| CGA-E9-A1R3-0 | 1900199 | 1788883 | c.3140A>G             | p.H1047R      | Substitution - Missense    | 3:178952085-178952085 |
| 1301954       | 1301954 | 1213005 | c.3140A>G             | p.H1047R      | Substitution - Missense    | 3:178952085-178952085 |
| 1124608       | 1124608 | 1037651 | c.3140A>G             | p.H1047R      | Substitution - Missense    | 3:178952085-178952085 |
| 1670325       | 1670325 | 1583611 | c.3140A>G             | p.H1047R      | Substitution - Missense    | 3:178952085-178952085 |
| 1278880       | 1278880 | 1190176 | c.?                   | p.H1047R      | Substitution - Missense    |                       |
| 1972535       | 1972535 | 1858784 | c.?                   | p.H1047R      | Substitution - Missense    |                       |
| 1419227       | 1419227 | 1329268 | c.3140A>G             | p.H1047R      | Substitution - Missense    | 3:178952085-178952085 |
| 1692229       | 1692229 | 1600494 | c.?                   | p.M1043I      | Substitution - Missense    |                       |
| 1692225       | 1692225 | 1600490 | c.?                   | p.H1047R      | Substitution - Missense    |                       |
| T47D          | 1998484 | 1883556 | c.3140A>G             | p.H1047R      | Substitution - Missense    | 3:178952085-178952085 |
| CGA-C8-A26X-0 | 1900030 | 1788714 | c.309_317delACCAGTAGG | p.E103_G106>D | Complex - deletion inframe | 3:178916922-178916930 |
| 2107724       | 2107724 | 1985585 | c.1624G>A             | p.E542K       | Substitution - Missense    | 3:178936082-178936082 |
| 2067951       | 2067951 | 1947744 | c.?                   | p.H1047R      | Substitution - Missense    |                       |
| CGA-EW-A1J1-0 | 1900235 | 1788919 | c.3130A>T             | p.N1044Y      | Substitution - Missense    | 3:178952075-178952075 |
| 1329740       | 1329740 | 1240225 | c.3140A>G             | p.H1047R      | Substitution - Missense    | 3:178952085-178952085 |
| CGA-E9-A227-0 | 1900214 | 1788898 | c.3140A>G             | p.H1047R      | Substitution - Missense    | 3:178952085-178952085 |
| CGA-A8-A08P-0 | 1899706 | 1788390 | c.1633G>A             | p.E545K       | Substitution - Missense    | 3:178936091-178936091 |



|         |         |         |           |         |                         |                       |
|---------|---------|---------|-----------|---------|-------------------------|-----------------------|
| 1301936 | 1301936 | 1212987 | c.1633G>A | p.E545K | Substitution - Missense | 3:178936091-178936091 |
| 1193557 | 1193557 | 1105453 | c.?       | p.E545K | Substitution - Missense |                       |

**Supplementary Table S2. Predictions by computational algorithms on the consequences of *PIK3CA* missense mutations**

| Variant | Condel             | PolyPhen                 | SIFT              | MutationAssessor | CanDrA +.CTS    |
|---------|--------------------|--------------------------|-------------------|------------------|-----------------|
| I31M    | neutral(0.287)     | benign(0.011)            | tolerated(0.1)    | neutral(0.46)    | Driver(0.9635)  |
| K111N   | deleterious(0.835) | probably_damaging(0.947) | deleterious(0)    | medium(2.42)     | Driver(0.80414) |
| N345I   | deleterious(0.831) | probably_damaging(0.981) | deleterious(0.01) | medium(2.175)    | Driver(0.66667) |
| N345K   | neutral(0.430)     | probably_damaging(0.973) | tolerated(0.41)   | medium(2.175)    | Driver(0.86861) |
| C420R   | deleterious(0.841) | probably_damaging(0.953) | deleterious(0)    | medium(1.905)    | Driver(0.77494) |
| E453K   | deleterious(0.558) | possibly_damaging(0.811) | tolerated(0.13)   | medium(2.08)     | Driver(0.92092) |
| P539R   | deleterious(0.734) | possibly_damaging(0.892) | deleterious(0.02) | medium(2.49)     | Driver(0.87348) |
| E542K   | deleterious(0.736) | probably_damaging(0.922) | deleterious(0.03) | low(1.27)        | Driver(0.81509) |
| E542V   | deleterious(0.823) | probably_damaging(0.975) | deleterious(0.01) | low(1.24)        | Driver(0.71046) |
| E545K   | deleterious(0.782) | possibly_damaging(0.868) | deleterious(0)    | low(1.62)        | Driver(0.69465) |
| E545Q   | deleterious(0.577) | possibly_damaging(0.706) | tolerated(0.06)   | low(1.75)        | Driver(0.68491) |
| E545A   | deleterious(0.820) | probably_damaging(0.927) | deleterious(0)    | low(1.38)        | Driver(0.67275) |
| E545G   | deleterious(0.855) | probably_damaging(0.968) | deleterious(0)    | medium(2.005)    | Driver(0.70925) |
| Q546K   | deleterious(0.611) | possibly_damaging(0.903) | tolerated(0.13)   | medium(1.975)    | Driver(0.75547) |
| Q546E   | neutral(0.178)     | possibly_damaging(0.504) | tolerated(0.51)   | neutral(-0.1)    | Driver(0.80292) |
| Q546P   | deleterious(0.734) | probably_damaging(0.986) | tolerated(0.08)   | medium(1.975)    | Driver(0.72019) |
| Q546R   | deleterious(0.732) | probably_damaging(0.968) | tolerated(0.06)   | medium(1.975)    | Driver(0.77616) |
| H701P   | neutral(0.216)     | possibly_damaging(0.529) | tolerated(0.24)   | neutral(0.49)    | Driver(0.86131) |
| A1020V  | deleterious(0.572) | possibly_damaging(0.6)   | deleterious(0.03) | low(1.16)        | Driver(0.50973) |
| M1043V  | neutral(0.407)     | benign(0.027)            | deleterious(0.01) | neutral(-0.485)  | Driver(0.26764) |
| M1043I  | neutral(0.408)     | benign(0.039)            | deleterious(0.01) | neutral(-1.43)   | Driver(0.27859) |
| N1044K  | deleterious(0.583) | possibly_damaging(0.582) | deleterious(0.02) | neutral(0.515)   | Driver(0.46715) |
| H1047Y  | neutral(0.044)     | benign(0.002)            | tolerated(0.21)   | neutral(-1.74)   | Driver(0.70438) |
| H1047R  | neutral(0.365)     | benign(0.205)            | deleterious(0.05) | neutral(0)       | Driver(0.83942) |
| H1047L  | neutral(0.007)     | benign(0.101)            | tolerated(1)      | neutral(-1.325)  | Driver(0.63017) |
| G1049R  | neutral(0.026)     | benign(0.172)            | tolerated(0.48)   | low(1.525)       | Driver(0.73479) |

| Variant | CanDrA +.GEN    | CHASM driver score | VEST functional score | MUTATION TASTER                    |
|---------|-----------------|--------------------|-----------------------|------------------------------------|
| I31M    | No-call(N/A)    | 0.242              | 0.711                 | disease_causing(0.999956008)       |
| K111N   | Driver(0.69)    | 0.18               | 0.372                 | disease_causing(0.999999322)       |
| N345I   | Driver(0.64822) | 0.12               | 0.81                  | disease_causing(0.9999999994686)   |
| N345K   | Driver(0.81458) | 0.148              | 0.323                 | disease_causing(0.999999974518022) |

|        |                 |       |       |                                    |
|--------|-----------------|-------|-------|------------------------------------|
| C420R  | Driver(0.77208) | 0.132 | 0.982 | disease_causing(0.99999999999976)  |
| E453K  | Driver(0.79883) | 0.14  | 0.877 | disease_causing(0.999999999933198) |
| P539R  | Driver(0.80213) | 0.098 | 0.956 | disease_causing(0.99999999994159)  |
| E542K  | Driver(0.78857) | 0.082 | 0.921 | disease_causing(0.99999999976481)  |
| E542V  | Driver(0.72298) | 0.06  | 0.943 | disease_causing(0.99999999950012)  |
| E545K  | Driver(0.74606) | 0.094 | 0.961 | disease_causing(0.99999999977394)  |
| E545Q  | Driver(0.74056) | 0.208 | 0.781 | disease_causing(0.99999999907259)  |
| E545A  | Driver(0.76145) | 0.066 | 0.964 | disease_causing(0.99999999895809)  |
| E545G  | Driver(0.70905) | 0.072 | 0.94  | disease_causing(0.99999999917041)  |
| Q546K  | Driver(0.79846) | 0.14  | 0.812 | disease_causing(0.9999999998774)   |
| Q546E  | Driver(0.80872) | 0.164 | 0.676 | disease_causing(0.99999999974685)  |
| Q546P  | Driver(0.73433) | 0.112 | 0.936 | disease_causing(0.99999999993104)  |
| Q546R  | Driver(0.79113) | 0.058 | 0.901 | disease_causing(0.99999999875349)  |
| H701P  | No-call(N/A)    | 0.178 | 0.911 | disease_causing(0.9999999945507)   |
| A1020V | Driver(0.4727)  | 0.046 | 0.693 | disease_causing(0.999999994967599) |
| M1043V | Driver(0.58007) | 0.044 | 0.913 | disease_causing(0.99999999968946)  |
| M1043I | Driver(0.57017) | 0.066 | 0.957 | disease_causing(0.999999999782073) |
| N1044K | Driver(0.50678) | 0.032 | 0.362 | disease_causing(0.999999962278491) |
| H1047Y | Driver(0.75082) | 0.042 | 0.941 | disease_causing(0.99999998971543)  |
| H1047R | No-call(N/A)    | 0.024 | 0.882 | disease_causing(0.99999996652391)  |
| H1047L | Driver(0.70612) | 0.036 | 0.916 | disease_causing(0.99999999325611)  |
| G1049R | Driver(0.72151) | 0.052 | 0.921 | disease_causing(0.99999999951561)  |

Supplementary Table S3. Mutagenic primer and barcode sequences of *PIK3CA* constructs and HiTMMoB reaction efficiencies

| Amino Acid Change | Nucleotide Change | Mutagenic Primer Seq                                  | Clones Picked | Mut Clones | % Mut | BC ID | BC Sequence               |
|-------------------|-------------------|-------------------------------------------------------|---------------|------------|-------|-------|---------------------------|
| E453K             | 1357G>A           | AGTACCTCATGGATTA <b>A</b> AAGATTTGCTGAACCCTATTGGTGTTA | 2             | 1          | 50.0  | 1     | tattatgagaagttgaatagtag   |
| E542V             | 1625A>T           | CGAGATCCTCTCTCTG <b>T</b> AATCACTGAGCAGGAGAAAGATTTTC  | 2             | 2          | 100.0 | 2     | atgaaagttagagttatgataag   |
| E545Q             | 1633G>C           | TCTCTCTGAAATCACT <b>C</b> AGCAGGAGAAAGATTTTCTATGGAGTC | 2             | 1          | 50.0  | 3     | aatagataagattgattgtgttg   |
| H701P             | 2102A>C           | GGATGTATTTGAAG <b>C</b> CCTGAATAGGCAAGTCGAGGCAATGG    | 2             | 1          | 50.0  | 4     | tgtaaagtgtatgtagtaattgag  |
| I31M              | 93A>G             | ACCAAATGGAATGAT <b>G</b> GTGACTTTAGAATGCCTCCGTGAGGC   | 2             | 1          | 50.0  | 5     | atagattaaagtgagagagttat   |
| M1043I            | 3129G>C           | ATTTTCATGAAACAAAT <b>C</b> AATGATGCACATCATGGTGGCTGGAC | 2             | 1          | 50.0  | 6     | gaatgtttgaaatgtagatag     |
| N1044K            | 3132T>A           | TCATGAAACAAATGAA <b>A</b> GATGCACATCATGGTGGCTGGACAAC  | 2             | 2          | 100.0 | 7     | aaattgtgaagattgtttgtga    |
| N345I             | 1034A>T           | TGTGCAACCTACGTG <b>A</b> TTGTAATATTCGAGACATTGATAAGAT  | 2             | 1          | 50.0  | 8     | tgtaagtgaatagtgagttatt    |
| A1020V            | 3059C>T           | TCTTTTGATGACATTG <b>T</b> ATACATTCGAAAGACCCTAGCCTTAGA | 2             | 2          | 100.0 | 10    | agtgagattatgagtattgatta   |
| Q546E             | 1636C>G           | TCTGAAATCACTGAG <b>G</b> GAGGAGAAAGATTTTCTATGGAGTCAC  | 2             | 1          | 50.0  | 11    | gtgtaaagttgagatgatatt     |
| M1043V            | 3127A>G           | GTATTTTCATGAAACAA <b>G</b> TGAATGATGCACATCATGGTGGCTGG | 1             | 1          | 100.0 | 16    | gtagtagtaattggaatgtttgaa  |
| Q546P             | 1637A>C           | CTGAAATCACTGAG <b>C</b> CGGAGAAAGATTTTCTATGGAGTCACAC  | 1             | 1          | 100.0 | 17    | ttgtgaatgattaatgaatagaag  |
| T1025T            | 3075C>T           | CATACATTCGAAAG <b>A</b> CTCTAGCCTTAGATAAAACTGAGCAAGAC | 3             | 1          | 33.3  | 19    | gtgtgttattgtttgaaagat     |
| Q546K             | 1636C>A           | TCTGAAATCACTGAG <b>A</b> AGGAGAAAGATTTTCTATGGAGTCAC   | 2             | 2          | 100.0 | 20    | aaattagttgaaagtagagaaaag  |
| H1047Y            | 3139C>T           | ACAAATGAATGATGC <b>A</b> TATCATGGTGGCTGGACAACAAAAATG  | 1             | 1          | 100.0 | 23    | tagttagatatttgatagttatg   |
| K111N             | 333G>C            | GCAACCGTGAAGAAA <b>C</b> ATCCTCAATCGAGAAATTGGTTTTGC   | 2             | 2          | 100.0 | 24    | aataatgttgaaatagatgtga    |
| Q546R             | 1637A>G           | CTGAAATCACTGAG <b>C</b> GGGAGAAAGATTTTCTATGGAGTCACAC  | 2             | 2          | 100.0 | 27    | aagatgatagttaaagtgaagtta  |
| G1049R            | 3145G>C           | AAATGATGCACAT <b>C</b> ATCGTGGCTGGACAACAAAAATGGATTGG  | 5             | 2          | 40.0  | 28    | gatagattagaatgaattaagtg   |
| P539R             | 1616C>G           | ATTTCTACACGAG <b>A</b> TCTCTCTGAAATCACTGAGCAGGAGA     | 2             | 1          | 50.0  | 29    | tttaagtgagttatagaagtagta  |
| E545G             | 1634A>G           | TCTCTGAAATCACTG <b>G</b> CGAGGAGAAAGATTTTCTATGGAGTC   | 9             | 3          | 33.3  | 52    | gtaagattagaagttaatgaagaa  |
| C420R             | 1258T>C           | TGCTAAAGAGGAAC <b>A</b> CGTCCATTGGCATGGGGAAATATAAAC   | 2             | 2          | 100.0 | 32    | aagtgtttaagtgaagaaatgaa   |
| E545A             | 1634A>C           | TCTCTGAAATCACTG <b>C</b> GCAGGAGAAAGATTTTCTATGGAGTC   | 2             | 1          | 50.0  | 34    | tgatatagtagtaagaaataagt   |
| N345K             | 1035T>A           | GTGCAACCTACGTG <b>A</b> AGTAAATATTCGAGACATTGATAAGATC  | 9             | 1          | 11.1  | 35    | aataagagaattgatatgaagatg  |
| H1047L            | 3140A>T           | AAATGAATGATGC <b>A</b> CTTCATGGTGGCTGGACAACAAAAATGG   | 2             | 1          | 50.0  | 37    | tgatatgttaatgagatgttgta   |
| E542K             | 1624G>A           | ACGAGATCCTCTCT <b>T</b> AAATCACTGAGCAGGAGAAAGATTTTC   | 5             | 1          | 20.0  | 38    | agtaagtgtagatagattgaaat   |
| E545K             | 1633G>A           | TCTCTCTGAAATCACT <b>A</b> AGCAGGAGAAAGATTTTCTATGGAGTC | 2             | 2          | 100.0 | 39    | ttgtgatagtagttagatattgt   |
| H1047R            | 3140A>G           | AAATGAATGATGC <b>A</b> CTTCATGGTGGCTGGACAACAAAAATGG   | 2             | 1          | 50.0  | 40    | aatgtagagattgtagtgaatatt  |
| A1020A            | 3060A>T           | CTTTTGATGACATTG <b>T</b> TACATTCGAAAGACCCTAGCCTTAGAT  | 2             | 1          | 50.0  | 41    | atgtaattgtgaaatgtagtg     |
| Q546Q             | 1638G>A           | TGAAATCACTGAG <b>C</b> AGAGAAAGATTTTCTATGGAGTCACAG    | 5             | 1          | 20.0  | 43    | aaataagaatagagagagaaagtt  |
| N345N             | 1035T>C           | GTGCAACCTACGTG <b>A</b> CGTAAATATTCGAGACATTGATAAGATC  | 5             | 1          | 20.0  | 44    | aatgtaaagtaaagaaagtgatga  |
| G1049G            | 3147T>A           | ATGATGCACAT <b>C</b> ATGGAGGCTGGACAACAAAAATGGATTGGAT  | 2             | 2          | 100.0 | 45    | gtagtagtagatgaatattgtgta  |
| P539P             | 1617T>A           | TTTCTACACGAG <b>A</b> TCCACTCTCTGAAATCACTGAGCAGGAGAA  | 2             | 1          | 50.0  | 46    | gtgattgaatagtagattgttaa   |
| C420C             | 1260T>C           | CTAAAGAGGAAC <b>A</b> CTGCCATTGGCATGGGGAAATATAAACTT   | 2             | 2          | 100.0 | 47    | tattgtgaaatgtgttaaagaga   |
| E542E             | 1626A>G           | AGATCCTCTCTCT <b>G</b> ATCACTGAGCAGGAGAAAGATTTTCT     | 2             | 1          | 50.0  | 48    | tatgaatgttattgtgttgatt    |
| E545E             | 1635G>A           | TCTCTGAAATCACT <b>G</b> AACAGGAGAAAGATTTTCTATGGAGTCAC | 5             | 1          | 20.0  | 49    | tgtaagtttaaagtaagaaatgtg  |
| H1047H            | 3141T>C           | AAATGAATGATGC <b>A</b> CCATGGTGGCTGGACAACAAAAATGGA    | 10            | 5          | 50.0  | 50    | agagatattagaatgtaagaatag  |
| WT                | -                 |                                                       |               |            |       | 51    | gataagaaagtgaaatgtaaatgtg |
|                   |                   |                                                       |               | Average    | 62.4  |       |                           |

**Supplementary Table S4. Representative phenotyping for *PIK3CA* variants.**

|        | <b>COSMIC Frequency</b> | <b>Increased Lipid Kinase Activity</b> | <b>PI3K Pathway Activation</b>                                          | <b>Growth Factor-Independent Proliferation</b> | <b>In Vitro Transformation</b>                | <b>In Vivo Tumor Formation</b>           |
|--------|-------------------------|----------------------------------------|-------------------------------------------------------------------------|------------------------------------------------|-----------------------------------------------|------------------------------------------|
| N345I  | 0.000646831             | N/A                                    | N/A                                                                     | N/A                                            | N/A                                           | N/A                                      |
| I31M   | 0.000646831             | N/A                                    | N/A                                                                     | N/A                                            | N/A                                           | N/A                                      |
| E542V  | 0.000646831             | N/A                                    | N/A                                                                     | N/A                                            | N/A                                           | N/A                                      |
| H701P  | 0.000970246             | Yes(1)                                 | No-CEF(1)                                                               | N/A                                            | No-CEF(1)                                     | N/A                                      |
| A1020V | 0.000970246             | N/A                                    | N/A                                                                     | N/A                                            | N/A                                           | N/A                                      |
| T1025T | 0.001293661             | N/A                                    | N/A                                                                     | N/A                                            | N/A                                           | N/A                                      |
| Q546E  | 0.001293661             | N/A                                    | N/A                                                                     | N/A                                            | N/A                                           | N/A                                      |
| N1044K | 0.001617076             | N/A                                    | N/A                                                                     | N/A                                            | N/A                                           | N/A                                      |
| M1043I | 0.001940492             | Yes(2, 3)                              | No-CEF(1)                                                               | N/A                                            | Yes-CEF(1)                                    | N/A                                      |
| M1043V | 0.001940492             | N/A                                    | No-CEF(1)                                                               | N/A                                            | Yes-CEF(1)                                    | N/A                                      |
| Q546P  | 0.002587322             | N/A                                    | Yes-CEF(1)                                                              | N/A                                            | Yes-CEF(1)                                    | N/A                                      |
| E545Q  | 0.002587322             | N/A                                    | N/A                                                                     | N/A                                            | N/A                                           | N/A                                      |
| P539R  | 0.003234153             | Yes(1)                                 | Yes-CEF(1)                                                              | N/A                                            | Yes-CEF(1)                                    | N/A                                      |
| K111N  | 0.003557568             | N/A                                    | N/A                                                                     | N/A                                            | Yes-CEF(1)                                    | N/A                                      |
| H1047Y | 0.003557568             | N/A                                    | N/A                                                                     | N/A                                            | Yes-CEF(1)                                    | N/A                                      |
| E453K  | 0.003557568             | Yes(4)                                 | N/A                                                                     | N/A                                            | N/A                                           | N/A                                      |
| Q546R  | 0.005174644             | N/A                                    | N/A                                                                     | N/A                                            | N/A                                           | N/A                                      |
| G1049R | 0.005174644             | Yes(3)                                 | N/A                                                                     | N/A                                            | N/A                                           | N/A                                      |
| Q546K  | 0.00549806              | Yes(1)                                 | Yes-CEF(1)                                                              | N/A                                            | Yes-CEF(1)                                    | N/A                                      |
| E545G  | 0.005821475             | N/A                                    | Yes-CEF(1)                                                              | N/A                                            | Yes-CEF(1)                                    | N/A                                      |
| C420R  | 0.007115136             | Yes(2, 3, 4)                           | Yes-CEF(1) MEF(2)                                                       | N/A                                            | Yes-CEF(1) MEF(2)                             | N/A                                      |
| N345K  | 0.015523933             | Yes(1,4)                               | Yes-CEF(1)                                                              | N/A                                            | Yes-CEF(1)                                    | N/A                                      |
| E545A  | 0.017141009             | Yes(1)                                 | Yes-CEF(1)                                                              | N/A                                            | Yes-CEF(1)                                    | N/A                                      |
| H1047L | 0.053040103             | Yes(3)                                 | No-CEF(1)                                                               | N/A                                            | Yes-CEF(1)                                    | N/A                                      |
| E542K  | 0.108020699             | Yes(2, 5, 11)                          | Yes-CEF(1, 5)                                                           | N/A                                            | Yes-CEF(1, 5)                                 | Yes-CE(12)                               |
| E545K  | 0.184993532             | Yes(2, 3, 4, 5, 6, 11)                 | Yes-CEF(1, 5) MEF(2)<br>MCF10A(6, 7) HCCCL(9)<br>HMEC(10) GEM (Mammary) | Yes-MCF10A(6, 7)<br>HMEC(10)<br>HCCCL(9)       | Yes-CEF(1, 5)<br>MCF10A(6) MEF(2)<br>HMEC(10) | Yes-CE(12)<br>GEM(Mammary gland 8)       |
| H1047R | 0.510996119             | Yes(1, 2, 3, 4, 5, 6, 11)              | Yes-CE(12) CEF(5)<br>MCF10A(6, 7) MEF(2)<br>GEM(Mammary gland 8)        | Yes-MCF10A(6, 7)<br>HMEC(10)<br>HCCCL(9)       | Yes-CEF(1, 5)<br>MCF10A(6) MEF(2)<br>HMEC(10) | Yes-CE(12)<br>GEM(Mammary gland 8, Lung) |

Abbreviations: CE, chicken embryo; CEF, chicken embryonic fibroblasts; MEF, mouse embryonic fibroblasts; HMEC, human mammary epithelial cells; HCCCL, human colorectal cancer cell line; GEM, genetically engineered mouse

- <sup>1</sup> Gymnopoulos M, Elsliger M-A, Vogt PK. Rare cancer-specific mutations in PIK3CA show gain of function. *Proc Natl Acad Sci U S A*. 2007;104(13):5569-5574.
- <sup>2</sup> Ikenoue T, Kanai F, Hikiba Y, et al. Functional analysis of PIK3CA gene mutations in human colorectal cancer. *Cancer Res*. 2005;65(11):4562-4567.
- <sup>3</sup> Hon W-C, Berndt A, Williams RL. Regulation of lipid binding underlies the activation mechanism of class IA PI3-kinases. *Oncogene*. 2012;31(32):3655-3666.
- <sup>4</sup> Burke JE, Perisic O, Masson GR, Vadas O, Williams RL. Oncogenic mutations mimic and enhance dynamic events in the natural activation of phosphoinositide 3-kinase p110 (PIK3CA). *Proc Natl Acad Sci*. 2012;109(38):15259-15264.
- <sup>5</sup> Kang S, Bader AG, Vogt PK. Phosphatidylinositol 3-kinase mutations identified in human cancer are oncogenic. *Proc Natl Acad Sci U S A*. 2005;102(3):802-807.
- <sup>6</sup> Isakoff SJ, Engelman J a, Irie HY, et al. Breast cancer-associated PIK3CA mutations are oncogenic in mammary epithelial cells. *Cancer Res*. 2005;65(23):10992-11000.
- <sup>7</sup> Gustin JP, Karakas B, Weiss MB, et al. Knockin of mutant PIK3CA activates multiple oncogenic pathways. *Proc Natl Acad Sci U S A*. 2009;106(8):2835-2840.
- <sup>8</sup> Hanker AB, Pfeifferle AD, Balko JM, et al. Mutant PIK3CA accelerates HER2-driven transgenic mammary tumors and induces resistance to combinations of anti-HER2 therapies. *Proc Natl Acad Sci U S A*. 2013;110(35):14372-14377.
- <sup>9</sup> Samuels Y, Diaz L a, Schmidt-Kittler O, et al. Mutant PIK3CA promotes cell growth and invasion of human cancer cells. *Cancer Cell*. 2005;7(6):561-573.
- <sup>10</sup> Zhao JJ, Liu Z, Wang L, Shin E, Loda MF, Roberts TM. The oncogenic properties of mutant p110alpha and p110beta phosphatidylinositol 3-kinases in human mammary epithelial cells. *Proc Natl Acad Sci U S A*. 2005;102(51):18443-18448.
- <sup>11</sup> Carson JD, Van Aller G, Lehr R, et al. Effects of oncogenic p110alpha subunit mutations on the lipid kinase activity of phosphoinositide 3-kinase. *Biochem J*. 2008;409(2):519-524.
- <sup>12</sup> Bader AG, Kang S, Vogt PK. Cancer-specific mutations in PIK3CA are oncogenic in vivo. *Proc Natl Acad Sci U S A*. 2006;103(5):1475-1479.
- <sup>13</sup> Engelman JA, Chen L, Tan X, et al. Effective use of PI3K and MEK inhibitors to treat mutant Kras G12D and PIK3CA H1047R murine lung cancers. *Nat Med*. 2008;14(12):1351-1356.

**Supplementary Table S5. Barcode representation for *PIK3CA* variants in each sequenced tumor core**

|              |                             | <b>GFP</b>  | <b>WT</b>   | <b>A1020A</b> | <b>P539P</b> | <b>Q546Q</b> | <b>C420C</b> | <b>N345N</b> | <b>E542E</b> |
|--------------|-----------------------------|-------------|-------------|---------------|--------------|--------------|--------------|--------------|--------------|
|              |                             | <b>BC12</b> | <b>BC51</b> | <b>BC41</b>   | <b>BC46</b>  | <b>BC43</b>  | <b>BC47</b>  | <b>BC44</b>  | <b>BC48</b>  |
| <b>Input</b> | Average % of representation | 0.0198329   | 0.0315394   | 0.018088      | 0.0082366    | 0.0212483    | 0.01871      | 0.0208904    | 0.0522592    |
|              | Standard Deviation          | 0.0005353   | 0.0009695   | 0.0017575     | 3.404E-05    | 0.0022671    | 0.0018203    | 0.0008417    | 0.0009059    |
| <b>T1-1</b>  | Average % of representation | 1.844E-05   | 0           | 0             | 1.976E-05    | 0            | 0            | 0.0006164    | 0            |
|              | Standard Deviation          | 2.607E-05   | 0           | 0             | 1.868E-06    | 0            | 0            | 6.688E-05    | 0            |
| <b>T1-2</b>  | Average % of representation | 8.335E-06   | 0           | 8.335E-06     | 0            | 0            | 2.5E-05      | 0.0001944    | 0            |
|              | Standard Deviation          | 1.179E-05   | 0           | 1.179E-05     | 0            | 0            | 3.536E-05    | 5.519E-05    | 0            |
| <b>T1-3</b>  | Average % of representation | 0           | 3.049E-05   | 1.017E-05     | 2.029E-05    | 2.029E-05    | 4.061E-05    | 0.0016251    | 7.119E-05    |
|              | Standard Deviation          | 0           | 1.442E-05   | 1.438E-05     | 2.87E-05     | 2.87E-05     | 2.866E-05    | 0.0001984    | 0.0001007    |
| <b>T2-1</b>  | Average % of representation | 0           | 1.679E-05   | 2.518E-05     | 0            | 3.357E-05    | 0            | 0.0006735    | 1.679E-05    |
|              | Standard Deviation          | 0           | 2.374E-05   | 3.561E-05     | 0            | 4.748E-05    | 0            | 0.0002402    | 2.374E-05    |
| <b>T2-2</b>  | Average % of representation | 0           | 8.66E-06    | 0             | 0            | 0            | 0            | 0.0006192    | 0            |
|              | Standard Deviation          | 0           | 1.225E-05   | 0             | 0            | 0            | 0            | 0.000153     | 0            |
| <b>T2-3</b>  | Average % of representation | 0           | 9.066E-05   | 8.996E-06     | 0            | 9.136E-06    | 0            | 0.0016859    | 3.598E-05    |
|              | Standard Deviation          | 0           | 9.891E-07   | 1.272E-05     | 0            | 1.292E-05    | 0            | 5.853E-05    | 5.089E-05    |
| <b>T3-1</b>  | Average % of representation | 1.769E-05   | 0.0002379   | 0.0001759     | 7.866E-06    | 0.0001573    | 0            | 6.977E-05    | 0.0002605    |
|              | Standard Deviation          | 2.501E-05   | 8.631E-05   | 2.632E-05     | 1.112E-05    | 0.0002225    | 0            | 7.642E-05    | 5.686E-05    |
| <b>T3-2</b>  | Average % of representation | 0           | 9.227E-06   | 0             | 0            | 9.227E-06    | 0            | 0            | 0            |
|              | Standard Deviation          | 0           | 1.305E-05   | 0             | 0            | 1.305E-05    | 0            | 0            | 0            |
| <b>T3-3</b>  | Average % of representation | 0           | 2.771E-05   | 0             | 0            | 7.154E-05    | 0            | 0            | 0            |
|              | Standard Deviation          | 0           | 8.205E-06   | 0             | 0            | 5.377E-05    | 0            | 0            | 0            |
| <b>T4-1</b>  | Average % of representation | 1.235E-05   | 0           | 0             | 1.932E-05    | 3.437E-05    | 0            | 0.0014769    | 0            |
|              | Standard Deviation          | 1.747E-05   | 0           | 0             | 2.732E-05    | 2.128E-05    | 0            | 9.701E-05    | 0            |
| <b>T4-2</b>  | Average % of representation | 0           | 0           | 1.979E-05     | 9.893E-06    | 3.875E-05    | 0            | 0.0012967    | 4.947E-05    |
|              | Standard Deviation          | 0           | 0           | 2.798E-05     | 1.399E-05    | 2.682E-05    | 0            | 0.000181     | 6.996E-05    |
| <b>T4-3</b>  | Average % of representation | 5.521E-06   | 0           | 0             | 0            | 2.208E-05    | 0            | 0.0017501    | 4.604E-05    |
|              | Standard Deviation          | 7.808E-06   | 0           | 0             | 0            | 3.123E-05    | 0            | 0.0002577    | 2.647E-06    |
| <b>T5-1</b>  | Average % of representation | 0           | 0           | 0             | 5.972E-06    | 0            | 0            | 1.778E-05    | 0            |
|              | Standard Deviation          | 0           | 0           | 0             | 8.446E-06    | 0            | 0            | 8.633E-06    | 0            |
| <b>T5-2</b>  | Average % of representation | 0           | 2.387E-05   | 0             | 6.282E-05    | 3.018E-05    | 0            | 1.509E-05    | 0            |
|              | Standard Deviation          | 0           | 8.931E-06   | 0             | 3.92E-05     | 4.268E-05    | 0            | 2.134E-05    | 0            |
| <b>T5-3</b>  | Average % of representation | 0           | 1.293E-05   | 0             | 1.806E-05    | 0            | 2.586E-05    | 0            | 0            |
|              | Standard Deviation          | 0           | 1.829E-05   | 0             | 1.157E-06    | 0            | 3.657E-05    | 0            | 0            |
| <b>T6-1</b>  | Average % of representation | 0           | 9.809E-05   | 5.373E-05     | 5.454E-06    | 2.336E-05    | 0.0001044    | 7.768E-05    | 9.728E-06    |
|              | Standard Deviation          | 0           | 5.388E-05   | 6.565E-06     | 7.713E-06    | 5.525E-06    | 3.753E-05    | 1.355E-05    | 1.376E-05    |
| <b>T6-2</b>  | Average % of representation | 0           | 0.0001759   | 4.273E-06     | 1.648E-05    | 8.546E-06    | 2.748E-05    | 2.627E-05    | 0            |
|              | Standard Deviation          | 0           | 4.132E-05   | 6.043E-06     | 1.294E-05    | 1.209E-05    | 2.612E-06    | 2.507E-05    | 0            |
| <b>T6-3</b>  | Average % of representation | 0           | 0.0055394   | 2.066E-05     | 3.978E-05    | 2.582E-05    | 4.202E-05    | 0.0007082    | 0            |
|              | Standard Deviation          | 0           | 0.0007197   | 2.922E-05     | 1.244E-05    | 3.652E-05    | 1.362E-05    | 5.196E-05    | 0            |

|      |                             |   |           |           |   |   |           |           |           |
|------|-----------------------------|---|-----------|-----------|---|---|-----------|-----------|-----------|
| T7-1 | Average % of representation | 0 | 0         | 0         | 0 | 0 | 2.014E-05 | 8.324E-05 | 0         |
|      | Standard Deviation          | 0 | 0         | 0         | 0 | 0 | 8.552E-06 | 1.807E-05 | 0         |
| T7-2 | Average % of representation | 0 | 0         | 0         | 0 | 0 | 3.844E-05 | 0         | 5.594E-06 |
|      | Standard Deviation          | 0 | 0         | 0         | 0 | 0 | 8.933E-06 | 0         | 7.911E-06 |
| T7-3 | Average % of representation | 0 | 5.591E-06 | 1.118E-05 | 0 | 0 | 7.314E-05 | 0.0001045 | 1.7E-05   |
|      | Standard Deviation          | 0 | 7.906E-06 | 1.581E-05 | 0 | 0 | 7.255E-06 | 6.867E-05 | 2.404E-05 |



| E545E<br>BC49 | H1047H<br>BC50 | N345I<br>BC8 | I31M<br>BC5 | E542V<br>BC2 | H701P<br>BC4 | A1020V<br>BC10 | T1025T<br>BC19 | Q546E<br>BC11 | N1044K<br>BC7 | M1043I<br>BC6 | M1043V<br>BC16 |
|---------------|----------------|--------------|-------------|--------------|--------------|----------------|----------------|---------------|---------------|---------------|----------------|
| 0.0307505     | 0.0241482      | 0.037649     | 0.035422    | 0.0538093    | 0.0437313    | 0.0271738      | 0.0131954      | 0.021989      | 0.035675      | 0.0111195     | 0.03047        |
| 0.0012357     | 0.0023787      | 0.0010168    | 0.0015571   | 0.0008157    | 0.0019215    | 0.0007389      | 1.086E-05      | 0.001133      | 0.0001319     | 0.000396      | 0.0018592      |
| 9.218E-06     | 0              | 0.3645009    | 0.0001989   | 0.0993379    | 0.0058979    | 5.005E-05      | 1.054E-05      | 0.0023523     | 0.0003148     | 9.218E-06     | 0.0001264      |
| 1.304E-05     | 0              | 0.0096989    | 0.000162    | 0.0023851    | 0.0001544    | 1.864E-05      | 1.49E-05       | 4.166E-05     | 1.954E-06     | 1.304E-05     | 2.977E-05      |
| 0.0006452     | 0              | 0.0025817    | 9.708E-06   | 0.0018572    | 0.0020486    | 9.708E-06      | 8.335E-06      | 0.0026079     | 9.159E-05     | 0             | 0.0004288      |
| 0.0003231     | 0              | 2.657E-05    | 1.373E-05   | 0.0001553    | 6.828E-05    | 1.373E-05      | 1.179E-05      | 0.0002934     | 3.523E-05     | 0             | 0.0001349      |
| 2.034E-05     | 1.015E-05      | 0.0263092    | 0.0001117   | 0.044501     | 0.0095377    | 4.061E-05      | 6.092E-05      | 0.0062572     | 0.0002338     | 0             | 8.121E-05      |
| 2.876E-05     | 1.435E-05      | 0.0008192    | 4.291E-05   | 0.0001707    | 0.0005732    | 2.866E-05      | 2.863E-05      | 1.839E-05     | 0.0002446     | 0             | 5.733E-05      |
| 2.008E-05     | 8.394E-06      | 0.0015589    | 6.04E-05    | 0.0004024    | 0.000196     | 7.703E-05      | 5.859E-05      | 0.8172896     | 1.679E-05     | 0             | 7.373E-05      |
| 2.84E-05      | 1.187E-05      | 0.0002169    | 5.702E-05   | 0.0001431    | 6.355E-05    | 6.145E-05      | 5.912E-05      | 0.0079324     | 2.374E-05     | 0             | 9.312E-06      |
| 2.222E-05     | 0              | 0.0162684    | 0.0001903   | 0.0150126    | 0.0002657    | 4.33E-05       | 0.0002065      | 0.6714735     | 3.464E-05     | 4.199E-05     | 0.0002546      |
| 3.142E-05     | 0              | 0.0007273    | 4.922E-05   | 0.0003968    | 3.28E-05     | 6.123E-05      | 0.0001978      | 0.0102759     | 4.899E-05     | 3.489E-05     | 1.709E-05      |
| 1.799E-05     | 0              | 0.0030193    | 0.0001909   | 0.0435663    | 0.0003979    | 4.526E-05      | 0.0001899      | 0.7357384     | 9.136E-06     | 1.827E-05     | 0.0001362      |
| 2.544E-05     | 0              | 9.704E-05    | 9.183E-05   | 0.0037298    | 0.0001751    | 1.233E-05      | 8.767E-05      | 0.0075912     | 1.292E-05     | 2.584E-05     | 3.995E-05      |
| 0.0382291     | 0.0001809      | 0.0009829    | 0.000232    | 0.0227109    | 0.0001838    | 1.573E-05      | 7.866E-06      | 0.0191318     | 0.0002939     | 0             | 0.0957238      |
| 0.0014889     | 5.57E-05       | 1.062E-05    | 2.792E-05   | 7.683E-05    | 1.52E-05     | 2.225E-05      | 1.112E-05      | 0.0005575     | 5.963E-05     | 0             | 0.004708       |
| 9.079E-05     | 1.747E-05      | 0.0008869    | 9.128E-05   | 0.048844     | 0.0004917    | 2.768E-05      | 0              | 0.0141549     | 0.000232      | 1.747E-05     | 0.01127        |
| 5.429E-05     | 2.47E-05       | 7.982E-05    | 7.969E-05   | 0.001336     | 9.515E-05    | 3.915E-05      | 0              | 0.0001556     | 6.715E-05     | 2.47E-05      | 0.000399       |
| 5.285E-05     | 0              | 0.0006613    | 6.703E-05   | 0.0099545    | 0.0001959    | 6.638E-05      | 0              | 0.0202763     | 0.0003455     | 0             | 0.0075253      |
| 4.375E-05     | 0              | 3.65E-05     | 9.48E-05    | 0.000735     | 6.379E-05    | 9.153E-07      | 0              | 0.0003306     | 3.826E-05     | 0             | 0.000757       |
| 0.0082008     | 4.941E-05      | 0.0306073    | 5.907E-05   | 0.0203262    | 0.0001379    | 0.0008639      | 0.0002958      | 0.0740244     | 0.0156537     | 3.437E-05     | 0.0025169      |
| 0.0001775     | 6.988E-05      | 0.0003914    | 5.622E-05   | 0.0006051    | 0.0001601    | 0.0002109      | 3.587E-05      | 0.0092966     | 0.0015223     | 2.128E-05     | 0.0001443      |
| 0.0008267     | 0              | 0.0016062    | 8.018E-05   | 0.0134594    | 0.000534     | 0.0001296      | 0              | 0.0201851     | 0.0010203     | 9.893E-06     | 0.0014696      |
| 6.108E-06     | 0              | 0.0004148    | 2.944E-05   | 0.0006093    | 2.826E-07    | 4.051E-05      | 0              | 0.0005915     | 9.617E-05     | 1.399E-05     | 0.0001603      |
| 0.0013345     | 1.351E-05      | 0.0008814    | 0.0001221   | 0.1334538    | 0.0002068    | 4.052E-05      | 4.298E-05      | 0.076964      | 0.0031356     | 1.597E-05     | 0.0010661      |
| 0.0001228     | 3.485E-06      | 4.953E-05    | 1.464E-05   | 0.0047998    | 6.665E-05    | 1.045E-05      | 2.955E-05      | 0.000333      | 0.0004213     | 2.259E-05     | 0.0002881      |
| 0             | 1.792E-05      | 0.000772     | 0.0001715   | 0.0253521    | 0.0001002    | 5.972E-06      | 0              | 0.0003841     | 8.255E-05     | 2.933E-05     | 0.0305834      |
| 0             | 2.534E-05      | 0.0001965    | 2.777E-05   | 0.0001263    | 2.347E-05    | 8.446E-06      | 0              | 3.114E-05     | 1.539E-05     | 2.459E-05     | 0.0007854      |
| 0             | 0              | 0.0045066    | 0.0003064   | 0.0550817    | 0.0062556    | 1.509E-05      | 0.0001509      | 0.000954      | 3.264E-05     | 3.018E-05     | 0.0033596      |
| 0             | 0              | 0.0002426    | 3.619E-05   | 0.0011515    | 0.0001594    | 2.134E-05      | 0.0002134      | 0.0002394     | 3.479E-06     | 4.268E-05     | 0.000755       |
| 0             | 4.555E-05      | 0.0012857    | 3.017E-05   | 0.0005383    | 0.0003901    | 9.133E-05      | 8.62E-06       | 0.0010619     | 4.124E-05     | 0.0001787     | 0.0157451      |
| 0             | 1.566E-05      | 0.0005102    | 4.267E-05   | 6.633E-05    | 0.0002225    | 0.0001025      | 1.219E-05      | 9.988E-05     | 2.176E-05     | 9.428E-05     | 0.0009575      |
| 0.0001361     | 0              | 0.0533578    | 4.031E-05   | 0.0415483    | 3.427E-05    | 0              | 5.1E-05        | 0.0648165     | 0.0044304     | 0.0003074     | 0.0047117      |
| 6.9E-05       | 0              | 0.00235      | 4.326E-05   | 0.001319     | 2.095E-05    | 0              | 1.042E-05      | 0.0017378     | 0.0006272     | 3.576E-05     | 0.0004173      |
| 0.000168      | 8.546E-06      | 0.305736     | 7.333E-06   | 0.1681115    | 6.533E-05    | 8.546E-06      | 7.021E-05      | 0.0767885     | 0.0101188     | 1.833E-05     | 0.0022293      |
| 3.208E-05     | 1.209E-05      | 0.0085174    | 1.037E-05   | 0.0032921    | 4.054E-05    | 1.209E-05      | 5.781E-05      | 0.002632      | 0.0009439     | 2.592E-05     | 0.0003005      |
| 4.565E-05     | 3.392E-05      | 0.1075391    | 3.685E-05   | 0.0045731    | 1.033E-05    | 1.326E-05      | 2.247E-05      | 0.0307309     | 0.0019081     | 0.0001002     | 0.0313695      |
| 4.995E-05     | 2.507E-05      | 0.0010846    | 6.315E-06   | 2.511E-05    | 1.461E-05    | 4.146E-06      | 2.568E-06      | 0.0019872     | 0.0001794     | 4.338E-06     | 0.0002024      |

|           |   |           |   |           |           |           |           |           |           |           |           |
|-----------|---|-----------|---|-----------|-----------|-----------|-----------|-----------|-----------|-----------|-----------|
| 7.046E-06 | 0 | 0.001634  | 0 | 0.0052545 | 4.365E-06 | 4.296E-05 | 0         | 0.0053613 | 0.00043   | 0.0001131 | 0.0265986 |
| 9.965E-06 | 0 | 0.0004174 | 0 | 0.0001365 | 6.172E-06 | 9.67E-07  | 0         | 0.0004669 | 0.0001696 | 5.211E-07 | 0.0012479 |
| 0         | 0 | 0.0108487 | 0 | 0.0031488 | 5.594E-06 | 2.238E-05 | 0         | 0.0227934 | 0.0005996 | 0.0001352 | 0.0516683 |
| 0         | 0 | 0.0003744 | 0 | 0.0003392 | 7.911E-06 | 3.164E-05 | 0         | 7.442E-05 | 0.0002121 | 7.771E-05 | 0.0006988 |
| 0         | 0 | 0.0037341 | 0 | 0.0072772 | 1.118E-05 | 5.928E-05 | 2.818E-05 | 0.0606525 | 0.0006567 | 0.000155  | 0.1443183 |
| 0         | 0 | 0.0001113 | 0 | 0.0001448 | 1.581E-05 | 3.639E-05 | 8.232E-06 | 0.0001347 | 0.0002014 | 4.527E-05 | 0.0014034 |

| Q546P<br>BC17 | E545Q<br>BC3 | P539R<br>BC29 | K111N<br>BC24 | H1047Y<br>BC23 | E453K<br>BC1 | Q546R<br>BC27 | G1049R<br>BC28 | Q546K<br>BC20 | E545G<br>BC52 |
|---------------|--------------|---------------|---------------|----------------|--------------|---------------|----------------|---------------|---------------|
| 0.0682495     | 0.0378376    | 0.0340888     | 0.0528484     | 0.0493556      | 0.0452767    | 0.0374583     | 0.0623014      | 0.0465517     | 0.0098689     |
| 0.0007777     | 0.0008214    | 0.0002045     | 0.0006422     | 0.0008024      | 0.0031286    | 0.0010855     | 0.0029198      | 0.0014728     | 0.0004064     |
| 0.0928192     | 0.0051143    | 0.0002147     | 0.000652      | 0.0184325      | 0.0380449    | 0.0029647     | 0.2774385      | 0.0900953     | 0.0007613     |
| 0.0011241     | 0.0010539    | 0.0001733     | 6.166E-05     | 0.0002829      | 5.972E-05    | 9.958E-05     | 0.0001727      | 0.0069905     | 8.59E-05      |
| 0.9381514     | 0.0139844    | 0.0003138     | 5.138E-05     | 0.0004707      | 0.0032757    | 0.0006427     | 0.0248607      | 0.007272      | 0.0004524     |
| 0.0013853     | 0.0004737    | 0.0001692     | 4.521E-05     | 0.0002538      | 3.544E-05    | 5.767E-05     | 0.0005335      | 0.0005365     | 7.406E-05     |
| 0.0195148     | 0.001544     | 0.0002946     | 0.0002031     | 0.0029559      | 0.002905     | 0.0012186     | 0.8558488      | 0.0246442     | 0.0018891     |
| 0.0020865     | 3.128E-05    | 4.358E-05     | 5.713E-05     | 1.925E-05      | 0.0001963    | 0.0004289     | 0.0030681      | 0.0018507     | 0.0002842     |
| 0.0138829     | 0.0093497    | 0.0013679     | 8.542E-05     | 0.0002163      | 8.887E-05    | 0.0347919     | 0.0054454      | 0.114217      | 2.683E-05     |
| 0.0005225     | 0.0006636    | 0.0002022     | 4.958E-05     | 5.027E-05      | 4.05E-05     | 0.0027178     | 6.226E-05      | 0.0049193     | 9.542E-06     |
| 0.0125069     | 0.0253401    | 0.1980253     | 0.0005897     | 0              | 0.000157     | 0.0005375     | 0.0284869      | 0.0299063     | 8.66E-06      |
| 0.0006643     | 0.0003898    | 0.0088279     | 0.0002683     | 0              | 9.636E-05    | 2.54E-05      | 0.0021989      | 0.0020396     | 1.225E-05     |
| 0.0237497     | 0.0205403    | 0.010917      | 0.0006078     | 0.0001262      | 0.0004891    | 0.0021013     | 0.1159973      | 0.0402836     | 2.741E-05     |
| 0.0019845     | 0.0003656    | 0.0004012     | 7.073E-05     | 0.0001268      | 7.159E-05    | 0.000336      | 0.0024139      | 0.0010677     | 3.876E-05     |
| 0.0093054     | 0.0108369    | 0.0004777     | 0.0001583     | 0.1304703      | 0.0015483    | 0.0005043     | 0.6597481      | 0.008223      | 0.0001081     |
| 0.0005221     | 0.0001071    | 7.482E-05     | 1.31E-06      | 0.0030714      | 0.0006138    | 8.783E-05     | 0.0050486      | 0.0009272     | 2.835E-06     |
| 0.0014338     | 0.0020334    | 0.0003306     | 2.768E-05     | 0.0041427      | 0.0017285    | 0.0008195     | 0.9081557      | 0.004969      | 0.0002165     |
| 0.0005663     | 0.0001876    | 7.602E-05     | 3.915E-05     | 0.0001693      | 0.0006437    | 0.000146      | 0.000732       | 0.0003323     | 5.916E-05     |
| 0.0020612     | 0.0069182    | 0.0013528     | 4.963E-05     | 0.0042435      | 0.0112706    | 0.0011137     | 0.9291391      | 0.0044162     | 0.0001908     |
| 0.0004978     | 0.0005491    | 5.385E-05     | 2.278E-05     | 0.0001133      | 0.0007951    | 0.0002735     | 0.0010787      | 0.0006984     | 9.104E-06     |
| 0.2842414     | 0.246131     | 0.0098718     | 0.0010135     | 0.018803       | 0.0080267    | 0.0673233     | 0.1405629      | 0.069171      | 0.0005427     |
| 0.0089664     | 0.0076903    | 0.0008194     | 0.0003152     | 0.0019206      | 0.0002052    | 0.0055501     | 0.0007638      | 0.0044944     | 0.0002434     |
| 0.3957948     | 0.0097704    | 0.0129454     | 9.543E-05     | 0.0593727      | 0.0007049    | 0.0116021     | 0.3734684      | 0.0895364     | 0.0059736     |
| 0.0125663     | 0.0018808    | 0.0005666     | 3.294E-05     | 0.0023886      | 0.0002623    | 0.0009413     | 0.001239       | 0.0045029     | 0.0008983     |
| 0.0239284     | 0.001548     | 0.0066168     | 0.0272151     | 0.0028079      | 0.000299     | 0.5040372     | 0.1167888      | 0.0975299     | 0.0001277     |
| 0.0001733     | 0.0002468    | 0.0005268     | 0.0006127     | 0.0004106      | 0.0001418    | 0.0020711     | 0.0073845      | 0.0004511     | 2.245E-05     |
| 0.0360855     | 6.477E-05    | 0.0005013     | 0.0004434     | 5.295E-05      | 8.215E-05    | 4.167E-05     | 0.612873       | 0.2923326     | 0             |
| 0.0013319     | 2.403E-05    | 8.392E-05     | 6.549E-05     | 2.421E-05      | 6.551E-05    | 4.242E-05     | 0.0015887      | 0.0035923     | 0             |
| 0.8563177     | 0.0002222    | 0.0014962     | 0.0023968     | 0.0005665      | 5.019E-05    | 0             | 0.0298264      | 0.038282      | 1.755E-05     |
| 0.0064184     | 5.811E-05    | 0.0007011     | 0.0010068     | 0.0001806      | 2.83E-05     | 0             | 0.001996       | 0.0001537     | 2.482E-05     |
| 0.1828765     | 2.237E-05    | 0.0009875     | 0.0018799     | 2.319E-05      | 4.986E-05    | 1.375E-05     | 0.7640468      | 0.0306265     | 0             |
| 0.0028897     | 4.939E-06    | 0.0001152     | 3.758E-05     | 2.06E-05       | 9.565E-06    | 7.252E-06     | 0.0031791      | 0.001001      | 0             |
| 0.0191037     | 0.0028782    | 0.0141017     | 0.0002466     | 0.1949102      | 0.0037416    | 0.0193108     | 0.4345285      | 0.1406969     | 0.0006755     |
| 0.000519      | 0.0004108    | 1.992E-05     | 0.0001328     | 0.0090445      | 0.0004625    | 0.0001103     | 0.0020294      | 0.0101442     | 4.734E-05     |
| 0.0094949     | 0.0006443    | 0.0009698     | 0.0034321     | 0.030474       | 0.0009111    | 0.0072132     | 0.3560035      | 0.027114      | 0.0001496     |
| 7.37E-05      | 9.193E-05    | 0.0001271     | 0.0004154     | 0.0002909      | 0.0002101    | 0.0002044     | 0.0012995      | 0.000905      | 6.639E-05     |
| 0.0109711     | 0.0005563    | 0.0014889     | 0.0019154     | 0.6102788      | 0.0197796    | 0.0589567     | 0.0840359      | 0.0287082     | 0.0005497     |
| 0.0010649     | 0.0001293    | 0.0001043     | 0.0003714     | 0.0098829      | 0.0014439    | 0.0038645     | 0.0019931      | 0.0013324     | 4.701E-05     |

|           |           |           |           |           |           |           |           |           |           |
|-----------|-----------|-----------|-----------|-----------|-----------|-----------|-----------|-----------|-----------|
| 0.0053377 | 0.0037807 | 7.283E-05 | 3.86E-05  | 0.0011956 | 8.224E-05 | 0.017908  | 0.8918551 | 0.0398665 | 0.0003135 |
| 0.0001546 | 0.0003443 | 1.658E-05 | 5.206E-06 | 0.0001362 | 5.652E-05 | 0.0007716 | 0.0048779 | 0.0033452 | 0.0001245 |
| 0.0084787 | 0.0158377 | 0.000687  | 1.678E-05 | 0.0011533 | 0.0001073 | 0.0065555 | 0.8513621 | 0.0264154 | 0.0001202 |
| 0.0006145 | 0.0012909 | 0.0001993 | 2.373E-05 | 0.0001094 | 3.815E-05 | 0.0002542 | 8.55E-05  | 0.0021987 | 1.174E-05 |
| 0.0218556 | 0.0101526 | 0.0005523 | 6.755E-05 | 0.0829387 | 0.0003207 | 0.0490463 | 0.5539504 | 0.0630728 | 0.0009392 |
| 0.0004693 | 0.0014391 | 0.0001327 | 6.509E-07 | 0.0023132 | 2.079E-05 | 0.0042616 | 0.0073985 | 0.0047908 | 0.000174  |
